# Supplementary material for: Stereoselective [4 + 3] annulation of azadienes and ethyl 4-bromo-3-oxobutanoate: construction of benzindeno-fused azepine derivatives
Source: Royal Society of Chemistry journal article supplement (doi:10.1039/d1ob01749g), 2021-01-01

## **Stereoselective [4+3] annulation of azadienes and ethyl 4-bromo-3-oxobutanoate: construction of benzindeno-fused azepine derivatives**

Jinhui Shen, Aimin Yu, and Xiangtai Meng \*

Tianjin Key Laboratory of Organic Solar Cells and Photochemical Conversion, School of Chemistry & Chemical Engineering Tianjin University of Technology, Tianjin 300384, P.R. China E-mail: aiminyu@tjut.edu.cn, mengxiangtai23@mail.nankai.edu.cn

### **Contents**

|                                                                       |     |
|-----------------------------------------------------------------------|-----|
| 1) General information.....                                           | S2  |
| 2) The structure of azadienes <b>1</b> .....                          | S2  |
| 3) General procedure for the synthesis of <b>3</b> and <b>4</b> ..... | S3  |
| 4) Synthetic procedure for <b>5</b> and <b>6</b> .....                | S3  |
| 5) Synthetic procedure for <b>7</b> .....                             | S3  |
| 6) Characterization of all new compounds.....                         | S4  |
| 7) NMR spectra of all new compounds.....                              | S16 |
| 8) NOESY spectra of <b>7</b> .....                                    | S47 |
| 9) References.....                                                    | S47 |
| 10) X-ray crystal structures.....                                     | S47 |

## 1. General information and materials

All reactions were performed under Ar atmospheres in oven-dried glassware with magnetic stirring. Unless otherwise stated, all reagents were purchased from commercial suppliers (Aldrich, TCI or Alfa Aesar) and used without further purification. All solvents were purified and dried according to standard methods prior to use. TLC monitored all reactions with silica gel-coated plates. Flash column chromatography was performed using 200-300 mesh silica gel.  $^1\text{H}$ - and  $^{13}\text{C}$  NMR spectra were recorded at ambient temperature on Bruker 400 instruments. All spectra were referenced to  $\text{CDCl}_3$  ( $^1\text{H}$   $\delta$  7.26 ppm and  $^{13}\text{C}$  NMR  $\delta$  77.00 ppm) and  $\text{DMSO}-d_6$  ( $^1\text{H}$  NMR,  $\delta$  2.50 ppm and  $^{13}\text{C}$  NMR,  $\delta$  39.52 ppm)..  $^{19}\text{F}$  NMR spectrum was recorded on Bruker 400 (376 MHz) spectrometers with  $\text{CFCl}_3$  as external standard. HRMS were obtained on Waters Xevo Q-TOF MS with ESI resource. Melting points were measured on a RY-I apparatus and are reported uncorrected. IR were measured on a Perkin-Elmer 983G apparatus. Compound **1** was synthesized according to the reported method<sup>1-2</sup>.

## 2. The structure of azadienes **1**

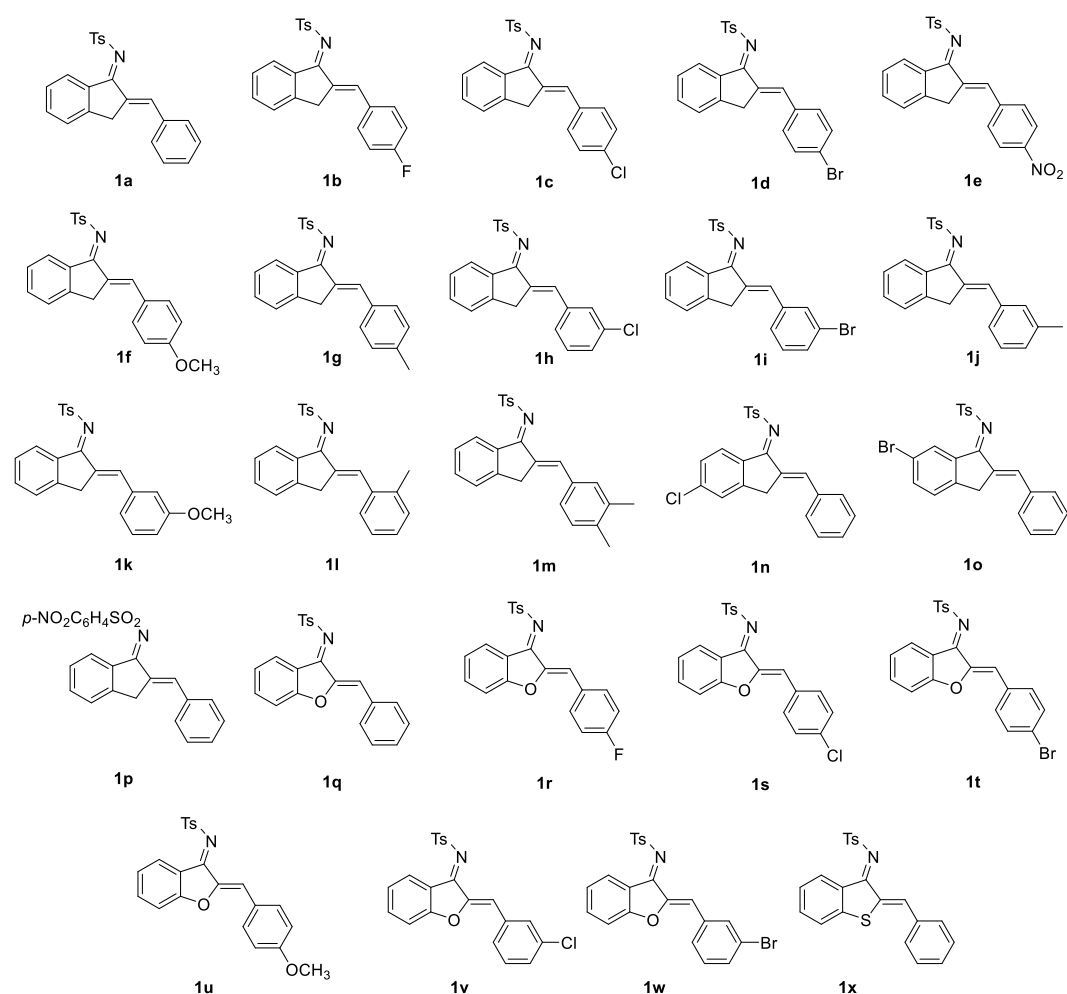

### General procedure for the synthesis of **1**

**1i** as an example

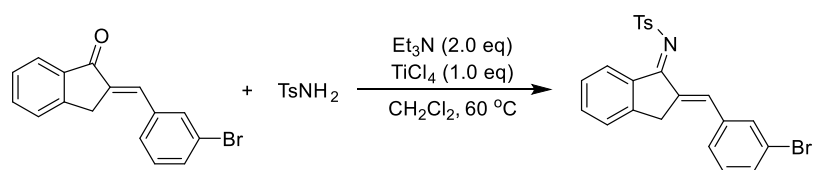

To a stirred solution of *p*-toluenesulfonamide (856.07 mg, 5.00 mmol) and enone (1.50 g, 5.00 mmol) in CH<sub>2</sub>Cl<sub>2</sub> (20 mL) were successively added Et<sub>3</sub>N (1.01 g, 10.00 mmol) and TiCl<sub>4</sub> (0.94 g, 5.00 mmol) at 0 °C with continuous stirring. The resulting mixture was refluxed at 60 °C. After the reaction was complete (monitored by TLC), then cooled to room temperature, quenched with water and the layers were separated. The aqueous layer was extracted with CH<sub>2</sub>Cl<sub>2</sub> (3 × 10 mL). The combined organic layers were washed with water (3 × 10 mL), dried over MgSO<sub>4</sub>, and concentrated in vacuo. The residue was purified by silica gel column chromatography (ethyl acetate/petroleum ether = 1:5) to afford **1i**.

### 3. General procedure for the synthesis of **3** and **4**

**3a** as an example

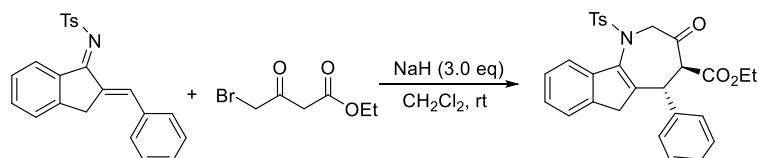

Under Ar atmosphere, **1a** (74.69 mg, 0.20 mmol, 1.0 eq) and **2a** (107.52 mg, 0.50 mmol, 2.5 eq) were dissolved in CH<sub>2</sub>Cl<sub>2</sub> 4 mL. To the above reaction mixture, NaH (14.40 mg, 0.60 mmol, 3.0 eq) was added. The reaction mixture was stirred at room temperature for 5–14 h. After the reaction was complete (monitored by TLC), the mixture was extracted with CH<sub>2</sub>Cl<sub>2</sub> (10 mL × 3). The combined organic layer was dried over anhydrous MgSO<sub>4</sub> and the solvent was removed under reduced pressure. The residue was purified by column chromatography (ethyl acetate/petroleum ether = 1:5) to give **3a** (93 mg, 93%) as a white solid.

### 4. Synthetic procedure for **5** and **6**

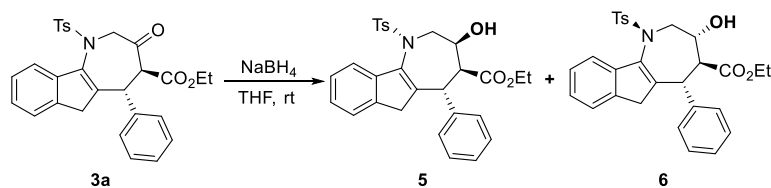

Under an Ar atmosphere, to a THF (4.0 mL) solution of **3a** (100.32 mg, 0.20 mmol, 1.0 eq) were added NaBH<sub>4</sub> (7.57 mg, 0.20 mmol, 1.0 eq). The reaction mixture was stirred at room temperature for 10 min. After the reaction was complete (monitored by TLC), the solvent was removed in vacuum. The residue was purified by column chromatography (ethyl acetate/petroleum ether = 1:3) to give **5** (55 mg, 55%) and **6** (25 mg, 25%).

### 5. Synthetic procedure for **7**

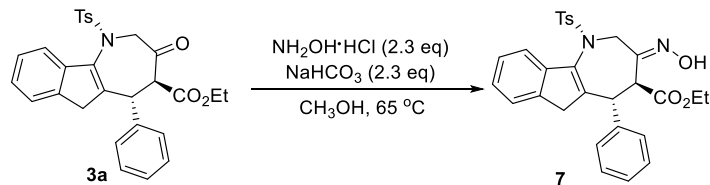

To a solution of **3a** (75.24 mg, 0.15 mmol, 1.0 eq) in 2.0 mL MeOH was added NaHCO<sub>3</sub> (28.98 mg, 0.35 mmol, 2.3 eq) and NH<sub>2</sub>OH·HCl (23.97 mg, 0.35 mmol, 2.3 eq), the mixture was stirred at 65 °C for 10 h. Then the reaction mixture was allowed to cool to room temperature, the solvent was evaporated and the residue was purified by column chromatography to give **7** (40 mg, 52%) as a white solid.

## 6. Characterization of all new compounds

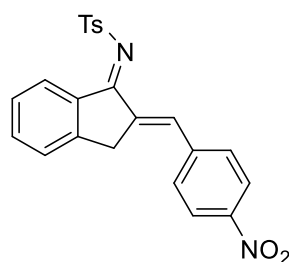

### 4-methyl-N-((Z)-2-((E)-4-nitrobenzylidene)-2,3-dihydro-1H-inden-1-ylidene)benzenesulfonamide (1e)

Yellow solid: 810 mg (yield 39%); mp 162-164 °C; IR (KBr) 3081, 1532, 1313, 1146, 1088, 840, 711, 565  $\text{cm}^{-1}$ ;  $^1\text{H}$  NMR (400 MHz,  $\text{CDCl}_3$ )  $\delta$  8.92 (s, 1H), 8.27 (d,  $J = 8.8$  Hz, 2H), 8.01 (d,  $J = 8.4$  Hz, 2H), 7.79 (s, 1H), 7.73 (d,  $J = 8.8$  Hz, 2H), 7.67 (t,  $J = 7.4$  Hz, 1H), 7.57 – 7.50 (m, 2H), 7.39 (d,  $J = 8.0$  Hz, 2H), 4.08 (s, 2H), 2.48 (s, 3H) ppm.  $^{13}\text{C}\{^1\text{H}\}$  NMR (100 MHz,  $\text{CDCl}_3$ )  $\delta$  174.7, 149.9, 147.6, 143.3, 141.5, 140.4, 139.5, 135.6, 131.0, 130.8, 129.5, 128.3, 126.9, 125.7, 124.0, 34.1, 21.7 ppm. HRMS (ESI-TOF)  $m/z$   $[\text{M} + \text{H}]^+$  calcd for  $\text{C}_{23}\text{H}_{19}\text{N}_2\text{O}_4\text{S}^+$  419.1060, found 419.1057.

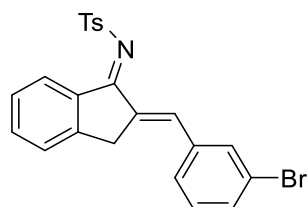

### N-((Z)-2-((E)-3-bromobenzylidene)-2,3-dihydro-1H-inden-1-ylidene)-4-methylbenzenesulfonamide (1i)

Yellow solid: 650 mg (yield 29%); mp 176-178 °C; IR (KBr) 3056, 1546, 1296, 1145, 1085, 846, 732, 670  $\text{cm}^{-1}$ ;  $^1\text{H}$  NMR (400 MHz,  $\text{CDCl}_3$ )  $\delta$  8.90 (d,  $J = 6.4$  Hz, 1H), 8.01 (d,  $J = 8.0$  Hz, 2H), 7.75 – 7.67 (m, 1H), 7.64 (t,  $J = 7.4$  Hz, 1H), 7.57 – 7.47 (m, 5H), 7.38 (d,  $J = 8.0$  Hz, 2H), 7.30 (t,  $J = 7.8$  Hz, 1H), 4.03 (s, 2H), 2.48 (s, 3H) ppm.  $^{13}\text{C}\{^1\text{H}\}$  NMR (100 MHz,  $\text{CDCl}_3$ )  $\delta$  175.2, 150.2, 143.1, 139.8, 137.8, 137.4, 135.3, 133.2, 132.5, 130.6, 130.4, 129.4, 129.1, 128.1, 126.8, 125.7, 123.0, 34.1, 21.7 ppm. HRMS (ESI-TOF)  $m/z$   $[\text{M} + \text{H}]^+$  calcd for  $\text{C}_{23}\text{H}_{19}\text{BrNO}_2\text{S}^+$  452.0314, found 452.0325.

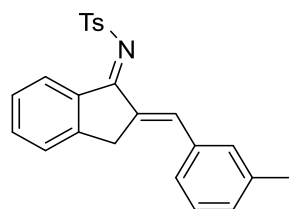

### 4-methyl-N-((Z)-2-((E)-3-methylbenzylidene)-2,3-dihydro-1H-inden-1-ylidene)benzenesulfonamide (1j)

Yellow solid: 435 mg (yield 22%); mp 176-178 °C; IR (KBr) 2915, 1541, 1289, 1139, 1082, 863, 717, 556  $\text{cm}^{-1}$ ;  $^1\text{H}$  NMR (400 MHz,  $\text{CDCl}_3$ )  $\delta$  8.90 (d,  $J = 7.2$  Hz, 1H), 8.03 (d,  $J = 8.0$  Hz, 2H), 7.80 (s, 1H), 7.63 (t,  $J = 7.6$  Hz, 1H), 7.54 (d,  $J = 7.6$  Hz, 1H), 7.50 (t,  $J = 7.6$  Hz, 1H), 7.43 (d,  $J = 8.0$  Hz, 1H), 7.41 – 7.36 (m, 3H), 7.33 (t,  $J = 7.6$  Hz, 1H), 7.20 (d,  $J = 7.6$  Hz, 1H), 4.05 (s, 2H), 2.47 (s, 3H), 2.40 (s,

3H) ppm.  $^{13}\text{C}\{^1\text{H}\}$  NMR (100 MHz,  $\text{CDCl}_3$ )  $\delta$  175.8, 150.4, 142.9, 140.1, 138.6, 136.1, 135.7, 135.3, 135.0, 134.4, 131.7, 130.7, 130.4, 129.4, 128.8, 127.9, 127.8, 126.8, 125.6, 34.3, 21.6, 21.5 ppm. HRMS (ESI-TOF)  $m/z$   $[\text{M} + \text{H}]^+$  calcd for  $\text{C}_{24}\text{H}_{22}\text{NO}_2\text{S}^+$  388.1366, found 388.1372.

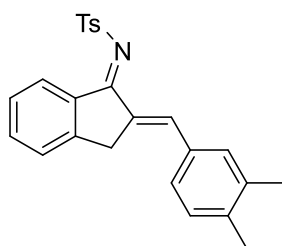

***N*-((*Z*)-2-((*E*)-3,4-dimethylbenzylidene)-2,3-dihydro-1*H*-inden-1-ylidene)-4-methylbenzenesulfonamide (1m)**

Yellow solid: 448 mg (yield 22%); mp 182-184 °C; IR (KBr) 3244, 3124, 1532, 1299, 1147, 1085, 853, 723, 557  $\text{cm}^{-1}$ ;  $^1\text{H}$  NMR (400 MHz,  $\text{CDCl}_3$ )  $\delta$  8.89 (d,  $J = 7.2$  Hz, 1H), 8.03 (d,  $J = 8.0$  Hz, 2H), 7.80 (s, 1H), 7.61 (t,  $J = 7.4$  Hz, 1H), 7.53 (d,  $J = 7.6$  Hz, 1H), 7.48 (t,  $J = 7.6$  Hz, 1H), 7.37 (d,  $J = 8.0$  Hz, 4H), 7.19 (d,  $J = 8.0$  Hz, 1H), 4.03 (s, 2H), 2.47 (s, 3H), 2.30 (s, 6H) ppm.  $^{13}\text{C}\{^1\text{H}\}$  NMR (100 MHz,  $\text{CDCl}_3$ )  $\delta$  175.9, 150.4, 142.8, 140.2, 139.3, 137.2, 135.9, 135.1, 134.9, 134.6, 133.0, 132.4, 130.35, 130.26, 129.4, 128.4, 127.9, 126.8, 125.6, 34.4, 21.6, 19.90, 19.88 ppm. HRMS (ESI-TOF)  $m/z$   $[\text{M} + \text{H}]^+$  calcd for  $\text{C}_{25}\text{H}_{24}\text{NO}_2\text{S}^+$  402.1522, found 402.1522.

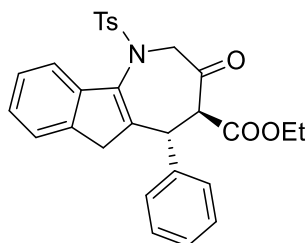

**Ethyl 3-oxo-5-phenyl-1-tosyl-1,2,3,4,5,6-hexahydroindeno[1,2-*b*]azepine-4-carboxylate (3a)**

White solid: 94 mg (yield 94%); mp 182-184 °C; 2965, 1748, 1716, 1370, 1340, 1165, 1090, 849, 769, 703  $\text{cm}^{-1}$ ;  $^1\text{H}$  NMR (400 MHz,  $\text{CDCl}_3$ )  $\delta$  7.92 (d,  $J = 8.4$  Hz, 2H), 7.42 (d,  $J = 8.4$  Hz, 2H), 7.35 (d,  $J = 7.2$  Hz, 2H), 7.34 – 7.25 (m, 2H), 7.26 – 7.21 (m, 2H), 7.20 – 7.12 (m, 2H), 7.06 – 7.00 (m, 1H), 4.90 (d,  $J = 18.4$  Hz, 1H), 4.85 (d,  $J = 11.6$  Hz, 1H), 4.29 (d,  $J = 12.0$  Hz, 1H), 4.15 (d,  $J = 18.4$  Hz, 1H), 4.07 – 3.94 (m, 2H), 3.11 (s, 2H), 2.50 (s, 3H), 1.06 (t,  $J = 7.0$  Hz, 3H) ppm.  $^{13}\text{C}\{^1\text{H}\}$  NMR (100 MHz,  $\text{CDCl}_3$ )  $\delta$  202.2, 167.9, 144.8, 143.3, 141.5, 140.8, 140.6, 137.1, 136.7, 130.3, 128.8, 128.7, 127.6, 127.6, 126.4, 125.8, 123.7, 120.1, 61.7, 61.7, 59.8, 46.8, 39.7, 21.7, 13.9 ppm. HRMS (ESI-TOF)  $m/z$   $[\text{M} + \text{H}]^+$  calcd for  $\text{C}_{29}\text{H}_{28}\text{NO}_5\text{S}^+$  502.1683, found 502.1664.

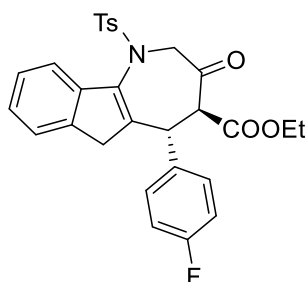

**Ethyl 5-(4-fluorophenyl)-3-oxo-1-tosyl-1,2,3,4,5,6-hexahydroindeno[1,2-*b*]azepine-4-carboxylate (3b)**

White solid: 95 mg (yield 91%); mp 154-156 °C; IR (KBr) 2981, 1746, 1722, 1408, 1336, 1238, 1160, 846, 815, 671  $\text{cm}^{-1}$ ;  $^1\text{H}$  NMR (400 MHz,  $\text{CDCl}_3$ )  $\delta$  7.91 (d,  $J = 8.4$  Hz, 2H), 7.46 – 7.36 (m, 4H), 7.26 – 7.21 (m, 1H), 7.18 – 7.12 (m, 2H), 6.99 (t,  $J = 8.6$  Hz, 2H), 6.94 – 6.87 (m, 1H), 4.93 (d,  $J = 5.6$  Hz, 1H), 4.89 (s, 1H), 4.31 (d,  $J = 12.0$  Hz, 1H), 4.12 (d,  $J = 18.4$  Hz, 1H), 4.09 – 3.95 (m, 2H), 3.11 (s, 2H), 2.50 (s, 3H), 1.09 (t,  $J = 7.0$  Hz, 3H) ppm.  $^{13}\text{C}\{^1\text{H}\}$  NMR (100 MHz,  $\text{CDCl}_3$ )  $\delta$  202.05, 168.0, 162.1 (d,  $J = 245.1$  Hz), 144.8, 143.3, 141.3, 140.7, 137.0 (d,  $J = 40.8$  Hz), 136.44, 136.41, 130.5 (d,  $J = 81.0$  Hz), 130.3, 127.6, 126.4, 125.9, 123.8, 120.0, 115.7 (d,  $J = 21.3$  Hz), 61.7, 61.3, 59.4, 46.0, 39.5, 21.7, 14.0 ppm.  $^{19}\text{F}$  NMR (376 MHz,  $\text{CDCl}_3$ )  $\delta$  -114.55 ppm. HRMS (ESI-TOF)  $m/z$   $[\text{M} + \text{H}]^+$  calcd for  $\text{C}_{29}\text{H}_{27}\text{FNO}_5\text{S}^+$  520.1588, found 520.1583.

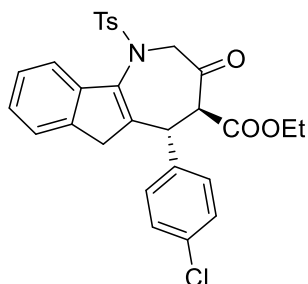

**Ethyl 5-(4-chlorophenyl)-3-oxo-1-tosyl-1,2,3,4,5,6-hexahydroindeno[1,2-*b*]azepine-4-carboxylate (3c)**

White solid: 88 mg (yield 82%); mp 153-155 °C; IR (KBr) 2973, 1747, 1718, 1367, 1341, 1161, 1129, 849, 769, 670  $\text{cm}^{-1}$ ;  $^1\text{H}$  NMR (400 MHz,  $\text{CDCl}_3$ )  $\delta$  7.91 (d,  $J = 8.0$  Hz, 2H), 7.43 (d,  $J = 8.0$  Hz, 2H), 7.35 (d,  $J = 8.4$  Hz, 2H), 7.27 (d,  $J = 8.4$  Hz, 2H), 7.25 – 7.21 (m, 1H), 7.19 – 7.10 (m, 2H), 6.97 – 6.86 (m, 1H), 4.92 (d,  $J = 11.6$  Hz, 1H), 4.88 (d,  $J = 5.2$  Hz, 1H), 4.29 (d,  $J = 12.0$  Hz, 1H), 4.13 (d,  $J = 18.4$  Hz, 1H), 4.09 – 3.96 (m, 2H), 3.11 (s, 2H), 2.51 (s, 3H), 1.11 (t,  $J = 7.0$  Hz, 3H) ppm.  $^{13}\text{C}\{^1\text{H}\}$  NMR (100 MHz,  $\text{CDCl}_3$ )  $\delta$  202.0, 168.0, 144.9, 142.9, 141.3, 140.7, 139.1, 137.2, 137.0, 133.5, 130.3, 130.2, 129.0, 127.6, 126.4, 126.0, 123.8, 120.0, 61.7, 61.4, 59.2, 46.0, 39.5, 21.7, 14.0 ppm. HRMS (ESI-TOF)  $m/z$   $[\text{M} + \text{H}]^+$  calcd for  $\text{C}_{29}\text{H}_{27}\text{ClNO}_5\text{S}^+$  536.1293, found 536.1287.

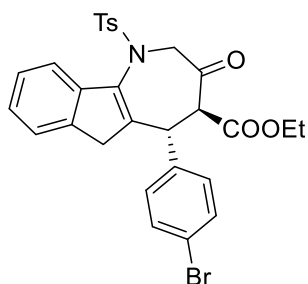

**Ethyl 5-(4-bromophenyl)-3-oxo-1-tosyl-1,2,3,4,5,6-hexahydroindeno[1,2-*b*]azepine-4-carboxylate (3d)**

White solid: 96 mg (yield 83%); mp 159-161 °C; IR (KBr) 2983, 1755, 1730, 1711, 1362, 1261, 1163, 1089, 849, 768, 669  $\text{cm}^{-1}$ ;  $^1\text{H}$  NMR (400 MHz,  $\text{CDCl}_3$ )  $\delta$  7.91 (d,  $J = 8.4$  Hz, 2H), 7.47 – 7.39 (m, 4H), 7.29 (d,  $J = 8.4$  Hz, 2H), 7.25 – 7.21 (m, 1H), 7.19 – 7.12 (m, 2H), 6.96 – 6.89 (m, 1H), 4.92 (d,  $J = 12.8$  Hz, 1H), 4.88 (d,  $J = 6.4$  Hz, 1H), 4.28 (d,  $J = 12.4$  Hz, 1H), 4.13 (d,  $J = 18.4$  Hz, 1H), 4.10 – 3.95 (m, 2H), 3.11 (s, 2H), 2.51 (s, 3H), 1.11 (t,  $J = 7.0$  Hz, 3H) ppm.  $^{13}\text{C}\{^1\text{H}\}$  NMR (100 MHz,  $\text{CDCl}_3$ )  $\delta$  202.0, 167.9, 144.9, 142.8, 141.3, 140.7, 139.7, 137.2, 137.1, 132.0, 130.6, 130.3, 127.6, 126.4, 126.0, 123.8, 121.7, 120.0, 61.7, 61.4, 59.1, 46.1, 39.5, 21.7, 14.0 ppm. HRMS (ESI-TOF)  $m/z$   $[\text{M} + \text{H}]^+$  calcd for  $\text{C}_{29}\text{H}_{27}\text{BrNO}_5\text{S}^+$  580.0788, found 580.0784.

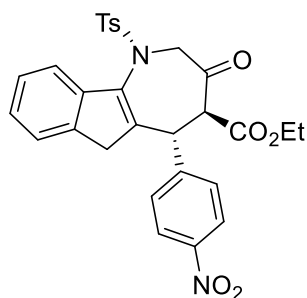

**Ethyl 5-(4-nitrophenyl)-3-oxo-1-tosyl-1,2,3,4,5,6-hexahydroindeno[1,2-*b*]azepine-4-carboxylate**

**(3e)**

White solid: 77 mg (yield 70%); mp 169-171 °C; IR (KBr) 2961, 1742, 1519, 1345, 1158, 834, 694, 561  $\text{cm}^{-1}$ ;  $^1\text{H}$  NMR (400 MHz,  $\text{CDCl}_3$ )  $\delta$  8.18 (d,  $J = 8.8$  Hz, 2H), 7.91 (d,  $J = 8.0$  Hz, 2H), 7.69 (d,  $J = 8.8$  Hz, 2H), 7.44 (d,  $J = 8.0$  Hz, 2H), 7.25 (d,  $J = 6.8$  Hz, 1H), 7.19 – 7.10 (m, 2H), 6.79 (d,  $J = 6.8$  Hz, 1H), 5.09 (d,  $J = 11.6$  Hz, 1H), 4.97 (d,  $J = 18.4$  Hz, 1H), 4.46 (d,  $J = 12.0$  Hz, 1H), 4.17 – 3.97 (m, 3H), 3.20 – 3.02 (m, 2H), 2.52 (s, 3H), 1.12 (t,  $J = 7.0$  Hz, 3H) ppm.  $^{13}\text{C}\{^1\text{H}\}$  NMR (100 MHz,  $\text{CDCl}_3$ )  $\delta$  201.6, 167.9, 147.9, 147.4, 145.0, 141.8, 140.9, 140.6, 137.8, 137.3, 130.3, 130.0, 127.6, 126.6, 126.3, 124.1, 123.9, 119.9, 61.8, 61.7, 58.6, 46.2, 39.4, 21.8, 14.0 ppm. HRMS (ESI-TOF)  $m/z$   $[\text{M} + \text{Na}]^+$  calcd for  $\text{C}_{29}\text{H}_{27}\text{N}_2\text{O}_7\text{S}^+$  547.1533, found 547.1548.

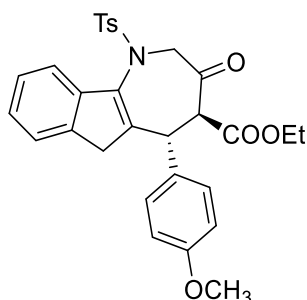

**Ethyl (4-methoxyphenyl)-3-oxo-1-tosyl-1,2,3,4,5,6-hexahydroindeno[1,2-*b*]azepine-4-carboxylate**

**(3f)**

White solid: 64 mg (yield 60%); mp 145-147 °C; IR (KBr) 2930, 1748, 1718, 1511, 1258, 1178, 1161, 816, 671, 548  $\text{cm}^{-1}$ ;  $^1\text{H}$  NMR (400 MHz,  $\text{CDCl}_3$ )  $\delta$  7.92 (d,  $J = 8.0$  Hz, 2H), 7.42 (d,  $J = 8.0$  Hz, 2H), 7.28 (d,  $J = 8.4$  Hz, 2H), 7.25 – 7.21 (m, 1H), 7.20 – 7.10 (m, 2H), 7.03 – 6.97 (m, 1H), 6.86 – 6.79 (m, 2H), 4.89 (d,  $J = 18.4$  Hz, 1H), 4.81 (d,  $J = 12.0$  Hz, 1H), 4.25 (d,  $J = 11.6$  Hz, 1H), 4.13 (d,  $J = 18.4$  Hz, 1H), 4.07 – 3.95 (m, 2H), 3.78 (s, 3H), 3.12 (d,  $J = 2.2$  Hz, 2H), 2.50 (s, 3H), 1.09 (t,  $J = 7.2$  Hz, 3H) ppm.  $^{13}\text{C}\{^1\text{H}\}$  NMR (100 MHz,  $\text{CDCl}_3$ )  $\delta$  202.0, 168.0, 144.9, 142.9, 141.3, 140.7, 139.1, 137.2, 137.0, 133.5, 130.3, 130.2, 129.0, 127.6, 126.4, 126.02, 125.99, 123.8, 120.0, 61.7, 61.4, 59.2, 46.0, 39.5, 21.7, 14.0 ppm. HRMS (ESI-TOF)  $m/z$   $[\text{M} + \text{H}]^+$  calcd for  $\text{C}_{30}\text{H}_{30}\text{NO}_6\text{S}^+$  532.1788, found 532.1797.

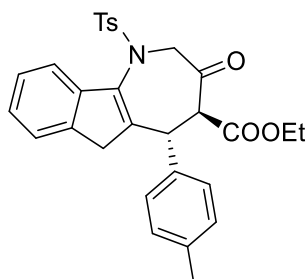

**Ethyl 3-oxo-5-(*p*-tolyl)-1-tosyl-1,2,3,4,5,6-hexahydroindeno[1,2-*b*]azepine-4-carboxylate (3g)**

White solid: 100 mg (yield 97%); mp 162-164 °C; IR (KBr) 2981, 1737, 1708, 1370, 1341, 1272, 1162, 1090, 813, 768, 670 cm<sup>-1</sup>; <sup>1</sup>H NMR (400 MHz, CDCl<sub>3</sub>) δ 7.92 (d, *J* = 8.4 Hz, 2H), 7.42 (d, *J* = 8.0 Hz, 2H), 7.22 (d, *J* = 7.6 Hz, 3H), 7.16 (t, *J* = 6.2 Hz, 2H), 7.09 (d, *J* = 8.0 Hz, 2H), 7.05 (d, *J* = 7.2 Hz, 1H), 4.89 (d, *J* = 18.4 Hz, 1H), 4.79 (d, *J* = 11.6 Hz, 1H), 4.25 (d, *J* = 12.0 Hz, 1H), 4.14 (d, *J* = 18.4 Hz, 1H), 4.08 – 3.94 (m, 2H), 3.11 (s, 2H), 2.50 (s, 3H), 2.31 (s, 3H), 1.07 (t, *J* = 7.0 Hz, 3H) ppm. <sup>13</sup>C{<sup>1</sup>H} NMR (100 MHz, CDCl<sub>3</sub>) δ 202.3, 168.0, 144.7, 143.6, 141.6, 140.8, 137.6, 137.2, 137.1, 136.4, 130.3, 129.4, 128.5, 127.7, 126.3, 125.8, 123.7, 120.1, 61.6, 61.1, 59.4, 46.4, 39.6, 21.7, 21.1, 13.9 ppm. HRMS (ESI-TOF) *m/z* [M + H]<sup>+</sup> calcd for C<sub>30</sub>H<sub>30</sub>NO<sub>5</sub>S<sup>+</sup> 516.1839, found 516.1840.

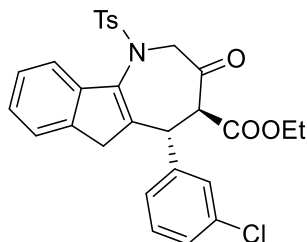**Ethyl 5-(3-chlorophenyl)-3-oxo-1-tosyl-1,2,3,4,5,6-hexahydroindeno[1,2-*b*]azepine-4-carboxylate (3h)**

White solid: 80 mg (yield 75%); mp 195-197 °C; IR (KBr) 2945, 1744, 1711, 1367, 1263, 1169, 1091, 817, 767, 668 cm<sup>-1</sup>; <sup>1</sup>H NMR (400 MHz, CDCl<sub>3</sub>) δ 7.92 (d, *J* = 8.0 Hz, 2H), 7.44 (d, *J* = 8.0 Hz, 2H), 7.37 (s, 1H), 7.33 – 7.28 (m, 1H), 7.26 – 7.21 (m, 3H), 7.20 – 7.15 (m, 2H), 7.05 – 6.99 (m, 1H), 4.92 (d, *J* = 18.8 Hz, 1H), 4.69 (d, *J* = 11.6 Hz, 1H), 4.26 (d, *J* = 12.0 Hz, 1H), 4.15 (d, *J* = 18.4 Hz, 1H), 4.09 – 3.98 (m, 2H), 3.12 (s, 2H), 2.49 (s, 3H), 1.09 (t, *J* = 7.1 Hz, 3H) ppm. <sup>13</sup>C{<sup>1</sup>H} NMR (100 MHz, CDCl<sub>3</sub>) δ 201.9, 167.7, 144.9, 142.5, 142.3, 141.4, 140.7, 137.2, 137.0, 134.5, 130.4, 130.1, 128.7, 127.9, 127.6, 127.1, 126.5, 126.0, 123.8, 120.3, 61.7, 61.4, 59.1, 46.3, 39.5, 21.7, 13.9 ppm. HRMS (ESI-TOF) *m/z* [M + H]<sup>+</sup> calcd for C<sub>29</sub>H<sub>27</sub>ClNO<sub>5</sub>S<sup>+</sup> 536.1293, found 536.1271.

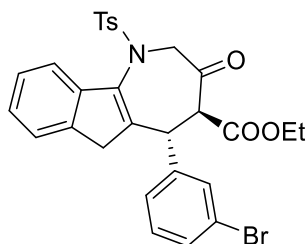**Ethyl 5-(3-bromophenyl)-3-oxo-1-tosyl-1,2,3,4,5,6-hexahydroindeno[1,2-*b*]azepine-4-carboxylate (3i)**

White solid: 62 mg (yield 53%); mp 186-188 °C; IR (KBr) 2945, 1743, 1711, 1367, 1264, 1169, 1092, 767, 668, 573 cm<sup>-1</sup>; <sup>1</sup>H NMR (400 MHz, CDCl<sub>3</sub>) δ 7.92 (d, *J* = 8.0 Hz, 2H), 7.52 (s, 1H), 7.45 (d, *J* = 8.0 Hz, 2H), 7.38 (d, *J* = 7.6 Hz, 1H), 7.34 (d, *J* = 8.0 Hz, 1H), 7.26 – 7.23 (m, 1H), 7.22 – 7.14 (m, 3H), 7.06 – 7.00 (m, 1H), 4.91 (d, *J* = 18.4 Hz, 1H), 4.65 (d, *J* = 12.0 Hz, 1H), 4.25 (d, *J* = 12.0 Hz, 1H), 4.15 (d, *J* = 18.8 Hz, 1H), 4.09 – 3.94 (m, 2H), 3.11 (s, 2H), 2.49 (s, 3H), 1.09 (t, *J* = 7.2 Hz, 3H) ppm. <sup>13</sup>C{<sup>1</sup>H} NMR (100 MHz, CDCl<sub>3</sub>) δ 201.9, 167.7, 144.9, 142.8, 142.2, 141.4, 140.7, 137.3, 137.0, 131.5, 130.9, 130.4, 127.62, 127.56, 126.5, 126.0, 123.8, 122.7, 120.3, 61.6, 61.4, 59.2, 46.2, 39.5, 21.7, 13.9 ppm. HRMS (ESI-TOF) *m/z* [M + H]<sup>+</sup> calcd for C<sub>29</sub>H<sub>27</sub>BrNO<sub>5</sub>S<sup>+</sup> 580.0788, found 580.0801.



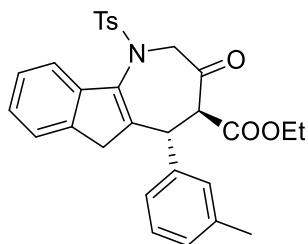

**Ethyl 3-oxo-5-(*m*-tolyl)-1-tosyl-1,2,3,4,5,6-hexahydroindeno[1,2-*b*]azepine-4-carboxylate (3j)**

White solid: 100 mg (yield 97%); mp 176-178 °C; IR (KBr) 2911, 1746, 1712, 1367, 1264, 1170, 1093, 768, 702, 669 cm<sup>-1</sup>; <sup>1</sup>H NMR (400 MHz, CDCl<sub>3</sub>) δ 7.93 (d, *J* = 8.0 Hz, 2H), 7.43 (d, *J* = 8.0 Hz, 2H), 7.23 (d, *J* = 6.8 Hz, 1H), 7.20 – 7.11 (m, 5H), 7.05 (t, *J* = 6.4 Hz, 2H), 4.89 (d, *J* = 18.8 Hz, 1H), 4.75 (d, *J* = 11.6 Hz, 1H), 4.24 (d, *J* = 11.6 Hz, 1H), 4.15 (d, *J* = 18.8 Hz, 1H), 4.07 – 3.94 (m, 4H), 3.11 (s, 2H), 2.49 (s, 3H), 2.33 (s, 3H), 1.06 (t, *J* = 7.2 Hz, 3H) ppm. <sup>13</sup>C{<sup>1</sup>H} NMR (100 MHz, CDCl<sub>3</sub>) δ 202.3, 167.9, 144.7, 143.4, 141.6, 140.8, 140.5, 138.4, 137.1, 136.5, 130.3, 129.3, 128.6, 128.4, 127.6, 126.4, 125.8, 123.7, 120.1, 61.6, 61.1, 59.4, 46.7, 39.6, 21.7, 21.5, 13.9 ppm. HRMS (ESI-TOF) *m/z* [M + H]<sup>+</sup> calcd for C<sub>30</sub>H<sub>30</sub>NO<sub>5</sub>S<sup>+</sup> 516.1839, found 516.1845.

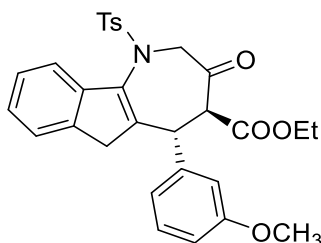

**Ethyl 5-(3-methoxyphenyl)-3-oxo-1-tosyl-1,2,3,4,5,6-hexahydroindeno[1,2-*b*]azepine-4-carboxylate (3k)**

Yellow solid: 76 mg (yield 72%); mp 162-164 °C; IR (KBr) 2909, 1743, 1172, 1367, 1257, 1170, 1091, 770, 668, 579 cm<sup>-1</sup>; <sup>1</sup>H NMR (400 MHz, CDCl<sub>3</sub>) δ 7.92 (d, *J* = 8.0 Hz, 2H), 7.42 (d, *J* = 8.0 Hz, 2H), 7.25 – 7.18 (m, 2H), 7.17 – 7.11 (m, 2H), 7.07 (s, 1H), 6.98 – 6.89 (m, 2H), 6.78 (dd, *J* = 7.8, 2.2 Hz, 1H), 4.95 (d, *J* = 11.6 Hz, 1H), 4.90 (d, *J* = 18.4 Hz, 1H), 4.29 (d, *J* = 12.0 Hz, 1H), 4.12 (d, *J* = 18.4 Hz, 1H), 4.09 – 3.97 (m, 2H), 3.80 (s, 3H), 3.14 (d, *J* = 1.6 Hz, 2H), 2.50 (s, 3H), 1.10 (t, *J* = 7.0 Hz, 3H) ppm. <sup>13</sup>C{<sup>1</sup>H} NMR (100 MHz, CDCl<sub>3</sub>) δ 202.3, 168.0, 160.0, 144.8, 143.6, 142.1, 141.5, 140.8, 137.3, 136.6, 130.3, 129.6, 127.6, 126.3, 125.8, 123.8, 121.1, 119.9, 113.8, 113.5, 61.7, 61.3, 59.3, 55.4, 46.7, 39.6, 21.7, 14.0 ppm. HRMS (ESI-TOF) *m/z* [M + H]<sup>+</sup> calcd for C<sub>30</sub>H<sub>30</sub>NO<sub>6</sub>S<sup>+</sup> 532.1788, found 532.1775.

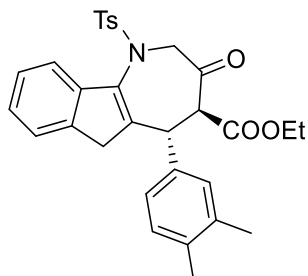

**Ethyl 5-(3,4-dimethylphenyl)-3-oxo-1-tosyl-1,2,3,4,5,6-hexahydroindeno[1,2-*b*]azepine-4-carboxylate (3m)**

White solid: 99 mg (yield 93%); mp 158-160 °C; IR (KBr) 2912, 1744, 1720, 1369, 1340, 1267, 1162, 826, 815, 671 cm<sup>-1</sup>; <sup>1</sup>H NMR (400 MHz, CDCl<sub>3</sub>) δ 7.93 (d, *J* = 8.4 Hz, 2H), 7.42 (d, *J* = 8.0 Hz,

2H), 7.24 – 7.12 (m, 4H), 7.06 (d,  $J = 7.6$  Hz, 1H), 7.03 (s, 2H), 4.87 (d,  $J = 18.8$  Hz, 1H), 4.72 (d,  $J = 11.6$  Hz, 1H), 4.21 (d,  $J = 10.8$  Hz, 1H), 4.14 (d,  $J = 18.4$  Hz, 1H), 4.08 – 3.93 (m, 2H), 3.11 (s, 2H), 2.49 (s, 3H), 2.24 (s, 3H), 2.21 (s, 3H), 1.07 (t,  $J = 7.2$  Hz, 3H) ppm.  $^{13}\text{C}\{^1\text{H}\}$  NMR (100 MHz,  $\text{CDCl}_3$ )  $\delta$  202.4, 168.0, 144.7, 143.7, 141.7, 140.8, 138.0, 137.1, 136.9, 136.3, 135.8, 130.3, 129.9, 129.7, 127.6, 126.3, 126.0, 125.7, 123.7, 120.1, 61.6, 61.1, 59.5, 46.3, 39.6, 21.7, 19.9, 19.4, 13.9 ppm. HRMS (ESI-TOF)  $m/z$   $[\text{M} + \text{H}]^+$  calcd for  $\text{C}_{31}\text{H}_{32}\text{NO}_5\text{S}^+$  530.1996, found 530.2009.

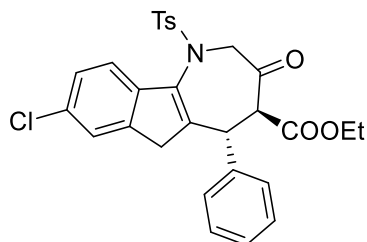

**Ethyl 8-chloro-3-oxo-5-phenyl-1-tosyl-1,2,3,4,5,6-hexahydroindeno[1,2-*b*]azepine-4-carboxylate**

**(3n)**

Yellow solid: 96 mg (yield 85%); mp 178-180 °C; IR (KBr) 2922, 1744, 1712, 1365, 1265, 1169, 1092, 817, 668, 594  $\text{cm}^{-1}$ ;  $^1\text{H}$  NMR (400 MHz,  $\text{CDCl}_3$ )  $\delta$  7.90 (d,  $J = 8.0$  Hz, 2H), 7.43 (d,  $J = 8.4$  Hz, 2H), 7.33 – 7.26 (m, 4H), 7.26 – 7.21 (m, 1H), 7.19 (s, 1H), 7.15 (dd,  $J = 8.4, 1.6$  Hz, 1H), 6.95 (d,  $J = 8.0$  Hz, 1H), 4.90 (d,  $J = 18.8$  Hz, 1H), 4.75 (d,  $J = 12.0$  Hz, 1H), 4.26 (d,  $J = 12.0$  Hz, 1H), 4.14 (d,  $J = 18.4$  Hz, 1H), 4.05 – 3.95 (m, 2H), 3.09 (d,  $J = 2.8$  Hz, 2H), 2.49 (s, 3H), 1.05 (t,  $J = 7.0$  Hz, 3H) ppm.  $^{13}\text{C}\{^1\text{H}\}$  NMR (100 MHz,  $\text{CDCl}_3$ )  $\delta$  202.0, 167.8, 145.0, 143.6, 142.4, 140.3, 140.1, 136.9, 136.1, 131.9, 130.4, 128.8, 128.6, 127.7, 127.6, 126.7, 124.2, 121.1, 61.6, 61.2, 59.3, 46.7, 39.4, 21.7, 13.9 ppm. HRMS (ESI-TOF)  $m/z$   $[\text{M} + \text{H}]^+$  calcd for  $\text{C}_{29}\text{H}_{27}\text{ClNO}_5\text{S}^+$  536.1293, found 536.1301.

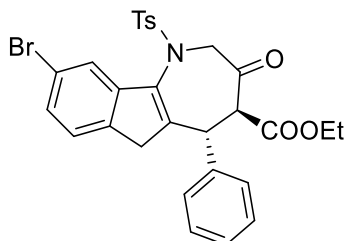

**Ethyl 9-bromo-3-oxo-5-phenyl-1-tosyl-1,2,3,4,5,6-hexahydroindeno[1,2-*b*]azepine-4-carboxylate**

**(3o)**

White solid: 110 mg (yield 95%); mp 113-115 °C; IR (KBr) 2974, 1744, 1616, 1360, 1346, 1269, 1161, 699, 672, 552  $\text{cm}^{-1}$ ;  $^1\text{H}$  NMR (400 MHz,  $\text{CDCl}_3$ )  $\delta$  7.88 (d,  $J = 8.0$  Hz, 2H), 7.47 – 7.40 (m, 4H), 7.31 (t,  $J = 7.2$  Hz, 2H), 7.28 – 7.24 (m, 1H), 7.22 (dd,  $J = 8.0, 1.6$  Hz, 1H), 7.05 (d,  $J = 8.0$  Hz, 1H), 6.71 – 6.61 (m, 1H), 5.02 (s, 1H), 4.99 (d,  $J = 8.0$  Hz, 1H), 4.30 (d,  $J = 11.6$  Hz, 1H), 4.11 (d,  $J = 18.4$  Hz, 1H), 4.07 – 3.96 (m, 1H), 3.06 (s, 1H), 2.52 (s, 2H), 1.07 (t,  $J = 7.2$  Hz, 1H) ppm.  $^{13}\text{C}\{^1\text{H}\}$  NMR (100 MHz,  $\text{CDCl}_3$ )  $\delta$  202.2, 167.9, 145.7, 145.2, 143.3, 140.3, 139.5, 137.3, 135.6, 130.4, 128.9, 128.8, 128.5, 127.7, 127.6, 125.1, 123.1, 120.4, 61.8, 61.3, 59.2, 46.9, 39.3, 21.8, 13.9 ppm. HRMS (ESI-TOF)  $m/z$   $[\text{M} + \text{H}]^+$  calcd for  $\text{C}_{29}\text{H}_{27}\text{BrNO}_5\text{S}^+$  580.0788, found 580.0809.

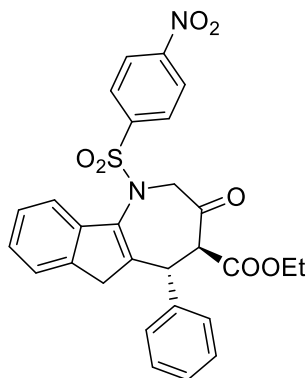

**Ethyl 1-((4-nitrophenyl)sulfonyl)-3-oxo-5-phenyl-1,2,3,4,5,6-hexahydroindeno[1,2-*b*]azepine-4-carboxylate (3p)**

White solid: 73 mg (yield 69%); mp 171-173 °C; IR (KBr) 3096, 1737, 1713, 1532, 1371, 1350, 1167, 1091, 737, 626, 599  $\text{cm}^{-1}$ ;  $^1\text{H}$  NMR (400 MHz,  $\text{CDCl}_3$ )  $\delta$  8.53 – 8.44 (m, 2H), 8.22 (d,  $J = 8.8$  Hz, 2H), 7.38 (d,  $J = 7.2$  Hz, 2H), 7.34 – 7.29 (m, 2H), 7.29 – 7.26 (m, 1H), 7.24 (s, 1H), 7.20 – 7.11 (m, 2H), 6.75 (d,  $J = 7.2$  Hz, 1H), 4.96 (d,  $J = 18.4$  Hz, 1H), 4.80 (d,  $J = 12.0$  Hz, 1H), 4.34 (d,  $J = 12.0$  Hz, 1H), 4.21 (d,  $J = 18.4$  Hz, 1H), 4.08 – 3.94 (m, 2H), 3.16 (s, 2H), 1.04 (t,  $J = 7.2$  Hz, 3H) ppm.  $^{13}\text{C}\{^1\text{H}\}$  NMR (100 MHz,  $\text{CDCl}_3$ )  $\delta$  201.2, 167.6, 150.6, 145.7, 144.5, 140.8, 140.8, 140.1, 136.0, 128.9, 128.6, 127.9, 126.5, 126.2, 124.9, 124.1, 119.3, 61.8, 61.5, 59.4, 46.8, 39.7, 13.9 ppm. HRMS (ESI-TOF)  $m/z$   $[\text{M} + \text{H}]^+$  calcd for  $\text{C}_{29}\text{H}_{25}\text{N}_2\text{O}_7\text{S}^+$  533.1377, found 533.1393.

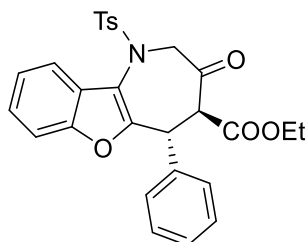

**Ethyl 3-oxo-5-phenyl-1-tosyl-2,3,4,5-tetrahydro-1*H*-benzofuro[3,2-*b*]azepine-4-carboxylate (4a)**

Yellow solid: 85 mg (yield 84%); mp 156-158 °C; IR (KBr) 2962, 1728, 1452, 1363, 1267, 1166, 1101, 755, 670, 544  $\text{cm}^{-1}$ ;  $^1\text{H}$  NMR (400 MHz,  $\text{CDCl}_3$ )  $\delta$  7.89 (d,  $J = 8.0$  Hz, 2H), 7.58 (d,  $J = 8.0$  Hz, 1H), 7.49 (d,  $J = 6.8$  Hz, 2H), 7.42 (d,  $J = 8.0$  Hz, 2H), 7.36 – 7.26 (m, 4H), 7.22 – 7.11 (m, 2H), 5.16 (d,  $J = 11.6$  Hz, 1H), 5.00 (d,  $J = 18.4$  Hz, 1H), 4.80 (d,  $J = 11.6$  Hz, 1H), 4.16 (d,  $J = 18.4$  Hz, 1H), 4.10 – 3.99 (m, 2H), 2.51 (s, 2H), 1.09 (t,  $J = 7.2$  Hz, 3H) ppm.  $^{13}\text{C}\{^1\text{H}\}$  NMR (100 MHz,  $\text{CDCl}_3$ )  $\delta$  201.9, 167.8, 144.9, 143.4, 141.2, 137.24, 137.20, 135.8, 130.3, 128.8, 128.7, 127.9, 127.7, 125.3, 124.4, 122.4, 122.1, 62.0, 61.4, 59.4, 46.1, 21.7, 13.9 ppm. HRMS (ESI-TOF)  $m/z$   $[\text{M} + \text{H}]^+$  calcd for  $\text{C}_{28}\text{H}_{26}\text{NO}_6\text{S}^+$  504.1475, found 504.1490.

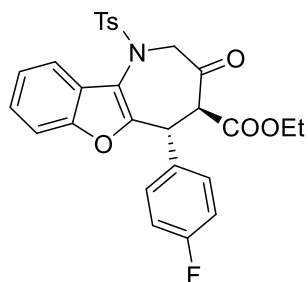

**Ethyl 5-(4-fluorophenyl)-3-oxo-1-tosyl-2,3,4,5-tetrahydro-1*H*-benzofuro[3,2-*b*]azepine-4-**

**carboxylate (4b)**

White solid: 85 mg (yield 81%); mp 174-176 °C; IR (KBr) 2964, 1748, 1606, 1517, 1344, 1235, 1169, 825, 677, 560  $\text{cm}^{-1}$ ;  $^1\text{H}$  NMR (400 MHz,  $\text{CDCl}_3$ )  $\delta$  7.87 (d,  $J = 8.4$  Hz, 2H), 7.42 (d,  $J = 8.0$  Hz, 2H), 7.30 – 7.26 (m, 1H), 7.25 – 7.17 (m, 3H), 7.16 – 7.10 (m, 2H), 6.95 (t,  $J = 8.6$  Hz, 2H), 5.12 (d,  $J = 18.8$  Hz, 1H), 4.64 (q,  $J = 12.4$  Hz, 2H), 4.23 (d,  $J = 18.4$  Hz, 1H), 4.14 – 3.99 (m, 2H), 2.51 (s, 3H), 1.12 (t,  $J = 7.2$  Hz, 3H) ppm.  $^{13}\text{C}\{^1\text{H}\}$  NMR (100 MHz,  $\text{CDCl}_3$ )  $\delta$  201.3, 167.0, 162.2 (d,  $J = 245.5$  Hz), 153.6, 152.1, 145.1, 136.5, 133.8, 130.5 (d,  $J = 8.2$  Hz), 130.4, 127.9, 125.5, 125.0, 123.4, 120.1, 119.2, 115.6 (d,  $J = 21.5$  Hz), 111.6, 62.7, 61.7, 58.2, 43.7, 21.8, 14.0 ppm.  $^{19}\text{F}$  NMR (376 MHz,  $\text{CDCl}_3$ )  $\delta$  -114.10 ppm. HRMS (ESI-TOF)  $m/z$   $[\text{M} + \text{H}]^+$  calcd for  $\text{C}_{28}\text{H}_{25}\text{FNO}_6\text{S}^+$  522.1381, found 522.1384.

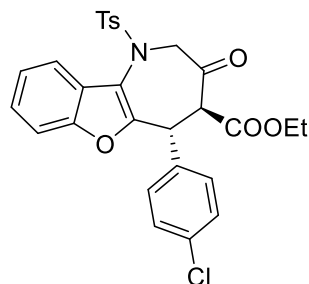**Ethyl 5-(4-chlorophenyl)-3-oxo-1-tosyl-2,3,4,5-tetrahydro-1H-benzofuro[3,2-b]azepine-4-carboxylate (4c)**

White solid: 100 mg (yield 93%); mp 154-156 °C; IR (KBr) 2950, 1736, 1337, 1228, 1162, 1083, 814, 748, 672  $\text{cm}^{-1}$ ;  $^1\text{H}$  NMR (400 MHz,  $\text{CDCl}_3$ )  $\delta$  7.87 (d,  $J = 8.4$  Hz, 2H), 7.42 (d,  $J = 8.0$  Hz, 2H), 7.28 (s, 1H), 7.26 – 7.20 (m, 3H), 7.20 – 7.12 (m, 4H), 5.12 (d,  $J = 18.8$  Hz, 1H), 4.62 (q,  $J = 12.1$  Hz, 2H), 4.24 (d,  $J = 18.58$  Hz, 1H), 4.15 – 3.98 (m, 2H), 2.51 (s, 3H), 1.14 (t,  $J = 7.2$  Hz, 3H) ppm.  $^{13}\text{C}\{^1\text{H}\}$  NMR (100 MHz,  $\text{CDCl}_3$ )  $\delta$  201.2, 167.0, 153.6, 151.8, 145.1, 136.6, 136.4, 133.8, 130.4, 130.2, 128.9, 127.9, 125.5, 125.0, 123.4, 120.1, 119.3, 111.6, 62.9, 61.7, 57.9, 43.8, 21.8, 14.0 ppm. HRMS (ESI-TOF)  $m/z$   $[\text{M} + \text{H}]^+$  calcd for  $\text{C}_{28}\text{H}_{25}\text{ClNO}_6\text{S}^+$  538.1086, found 538.1072.

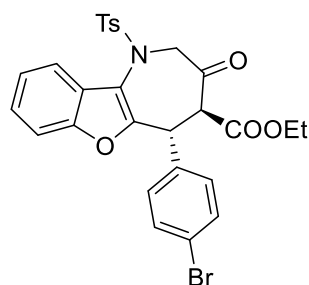**Ethyl 5-(4-bromophenyl)-3-oxo-1-tosyl-2,3,4,5-tetrahydro-1H-benzofuro[3,2-b]azepine-4-carboxylate (4d)**

White solid: 105 mg (yield 90%); mp 134-136 °C; IR (KBr) 2953, 1737, 1337, 1288, 1163, 1082, 815, 672, 556  $\text{cm}^{-1}$ ;  $^1\text{H}$  NMR (400 MHz,  $\text{CDCl}_3$ )  $\delta$  7.87 (d,  $J = 8.0$  Hz, 2H), 7.49 – 7.35 (m, 4H), 7.30 – 7.26 (m, 1H), 7.26 – 7.21 (m, 1H), 7.19 – 7.13 (m, 2H), 7.11 (d,  $J = 8.4$  Hz, 2H), 5.12 (d,  $J = 18.4$  Hz, 1H), 4.63 (q,  $J = 13.2$  Hz, 2H), 4.24 (d,  $J = 18.4$  Hz, 1H), 4.16 – 3.98 (m, 2H), 2.51 (s, 3H), 1.14 (t,  $J = 7.2$  Hz, 3H) ppm.  $^{13}\text{C}\{^1\text{H}\}$  NMR (100 MHz,  $\text{CDCl}_3$ )  $\delta$  201.2, 167.0, 153.6, 151.7, 145.1, 137.1, 136.4, 131.8, 130.5, 130.4, 127.8, 125.5, 125.0, 123.5, 122.0, 120.1, 119.3, 111.6, 62.7, 61.7, 57.9, 43.8, 21.8, 14.0 ppm. HRMS (ESI-TOF)  $m/z$   $[\text{M} + \text{H}]^+$  calcd for  $\text{C}_{28}\text{H}_{25}\text{BrNO}_6\text{S}^+$  582.0580, found 582.0598.

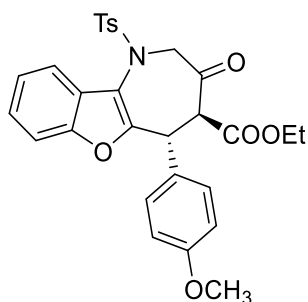

**Ethyl 5-(4-methoxyphenyl)-3-oxo-1-tosyl-2,3,4,5-tetrahydro-1H-benzofuro[3,2-*b*]azepine-4-carboxylate (4e)**

White solid: 93 mg (yield 87%); mp 145-147 °C; IR (KBr) 2989, 1742, 1606, 1513, 1257, 1165, 826, 674, 553  $\text{cm}^{-1}$ ;  $^1\text{H}$  NMR (400 MHz,  $\text{CDCl}_3$ )  $\delta$  7.87 (d,  $J = 8.4$  Hz, 2H), 7.42 (d,  $J = 8.0$  Hz, 2H), 7.28 (s, 1H), 7.25 – 7.20 (m, 2H), 7.18 – 7.12 (m, 1H), 7.10 (d,  $J = 8.8$  Hz, 2H), 6.78 (d,  $J = 8.8$  Hz, 2H), 5.11 (d,  $J = 18.8$  Hz, 1H), 4.65 – 4.50 (m, 2H), 4.23 (d,  $J = 18.4$  Hz, 1H), 4.12 – 3.96 (m, 2H), 3.77 (s, 3H), 2.50 (s, 3H), 1.12 (t,  $J = 7.1$  Hz, 3H) ppm.  $^{13}\text{C}\{^1\text{H}\}$  NMR (100 MHz,  $\text{CDCl}_3$ )  $\delta$  201.5, 167.1, 159.0, 153.5, 152.5, 145.0, 136.4, 130.4, 130.1, 129.8, 127.9, 125.3, 125.2, 123.3, 120.1, 118.9, 111.6, 62.7, 61.5, 58.4, 55.2, 43.8, 21.8, 14.0 ppm. HRMS (ESI-TOF)  $m/z$   $[\text{M} + \text{H}]^+$  calcd for  $\text{C}_{29}\text{H}_{28}\text{NO}_7\text{S}^+$  534.1581, found 534.1572.

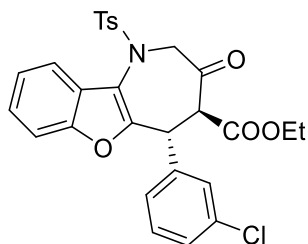

**Ethyl 5-(3-chlorophenyl)-3-oxo-1-tosyl-2,3,4,5-tetrahydro-1H-benzofuro[3,2-*b*]azepine-4-carboxylate (4f)**

White solid: 92 mg (yield 86%); mp 150-152 °C; IR (KBr) 2980, 1741, 1449, 1346, 1163, 1092, 751, 667, 648  $\text{cm}^{-1}$ ;  $^1\text{H}$  NMR (400 MHz,  $\text{CDCl}_3$ )  $\delta$  7.88 (d,  $J = 8.4$  Hz, 2H), 7.44 (d,  $J = 8.0$  Hz, 3H), 7.28 (d,  $J = 8.4$  Hz, 3H), 7.26 – 7.12 (m, 9H), 5.12 (d,  $J = 18.8$  Hz, 1H), 4.57 (d,  $J = 12.4$  Hz, 1H), 4.44 (d,  $J = 12.0$  Hz, 1H), 4.26 (d,  $J = 18.4$  Hz, 1H), 2.50 (s, 3H), 1.12 (t,  $J = 7.2$  Hz, 3H) ppm.  $^{13}\text{C}\{^1\text{H}\}$  NMR (100 MHz,  $\text{CDCl}_3$ )  $\delta$  201.2, 166.8, 153.6, 151.2, 145.1, 139.9, 136.2, 134.4, 130.5, 129.9, 128.5, 128.2, 127.7, 127.3, 125.6, 125.1, 123.5, 120.4, 119.5, 111.6, 62.6, 61.7, 57.9, 43.9, 21.8, 13.9 ppm. HRMS (ESI-TOF)  $m/z$   $[\text{M} + \text{H}]^+$  calcd for  $\text{C}_{28}\text{H}_{25}\text{ClNO}_6\text{S}^+$  538.1086, found 538.1078.

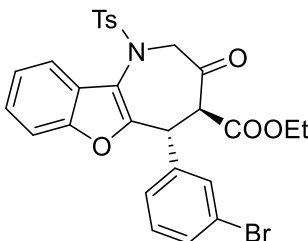

**Ethyl 5-(3-bromophenyl)-3-oxo-1-tosyl-2,3,4,5-tetrahydro-1H-benzofuro[3,2-*b*]azepine-4-carboxylate (4g)**

White solid: 90 mg (yield 77%); mp 159-141 °C; IR (KBr) 2991, 1732, 1453, 1365, 1270, 1166, 751, 672, 546  $\text{cm}^{-1}$ ;  $^1\text{H}$  NMR (400 MHz,  $\text{CDCl}_3$ )  $\delta$  7.88 (d,  $J = 8.4$  Hz, 2H), 7.45 (d,  $J = 8.0$  Hz, 2H), 7.41 –

7.36 (m, 2H), 7.33 – 7.26 (m, 2H), 7.26 – 7.23 (m, 1H), 7.22 – 7.14 (m, 3H), 5.10 (d,  $J = 18.8$  Hz, 1H), 4.55 (d,  $J = 12.0$  Hz, 1H), 4.41 (d,  $J = 12.0$  Hz, 1H), 4.25 (d,  $J = 18.4$  Hz, 1H), 4.11 – 3.99 (m, 2H), 2.50 (s, 3H), 1.12 (t,  $J = 7.2$  Hz, 3H) ppm.  $^{13}\text{C}\{^1\text{H}\}$  NMR (100 MHz,  $\text{CDCl}_3$ )  $\delta$  201.1, 166.8, 153.6, 151.2, 145.1, 140.2, 136.2, 131.5, 131.2, 130.6, 130.2, 128.7, 127.72, 127.71, 125.6, 125.1, 123.5, 122.6, 120.4, 119.6, 111.6, 62.6, 61.7, 58.0, 43.9, 21.8, 13.9 ppm. HRMS (ESI-TOF)  $m/z$   $[\text{M} + \text{H}]^+$  calcd for  $\text{C}_{28}\text{H}_{25}\text{BrNO}_6\text{S}^+$  582.0580, found 582.0580.

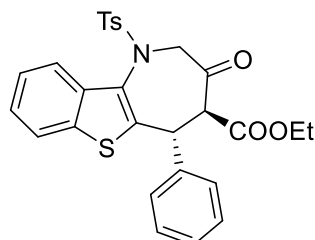

**Ethyl 3-oxo-5-phenyl-1-tosyl-2,3,4,5-tetrahydro-1H-benzo[4,5]thieno[3,2-b]azepine-4-carboxylate (4h)**

White solid: 80 mg (yield 77%); mp 175-177 °C; IR (KBr) 2985, 1737, 1344, 1281, 1163, 1091, 814, 758, 697  $\text{cm}^{-1}$ ;  $^1\text{H}$  NMR (400 MHz,  $\text{CDCl}_3$ )  $\delta$  7.89 (d,  $J = 8.4$  Hz, 2H), 7.58 (d,  $J = 8.0$  Hz, 1H), 7.49 (d,  $J = 7.2$  Hz, 2H), 7.42 (d,  $J = 8.4$  Hz, 2H), 7.36 – 7.27 (m, 4H), 7.21 – 7.13 (m, 2H), 5.16 (d,  $J = 12.0$  Hz, 1H), 5.00 (d,  $J = 18.4$  Hz, 1H), 4.80 (d,  $J = 12.0$  Hz, 1H), 4.16 (d,  $J = 18.4$  Hz, 1H), 4.12 – 3.99 (m, 2H), 2.51 (s, 3H), 1.09 (t,  $J = 7.0$  Hz, 3H) ppm.  $^{13}\text{C}\{^1\text{H}\}$  NMR (100 MHz,  $\text{CDCl}_3$ )  $\delta$  201.9, 167.8, 144.9, 143.4, 141.2, 137.2, 137.2, 135.8, 130.3, 128.8, 128.7, 127.9, 127.7, 125.3, 124.4, 122.4, 122.1, 62.0, 61.4, 59.4, 46.1, 21.7, 13.9 ppm. HRMS (ESI-TOF)  $m/z$   $[\text{M} + \text{H}]^+$  calcd for  $\text{C}_{28}\text{H}_{26}\text{NO}_5\text{S}_2^+$  520.1247, found 520.1230.

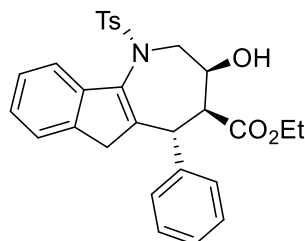

**Ethyl 3-hydroxy-5-phenyl-1-tosyl-1,2,3,4,5,6-hexahydroindeno[1,2-b]azepine-4-carboxylate (5)**

White solid: 55 mg (yield 55%); mp 172-174 °C; IR (KBr) 3530, 2982, 2879, 1709, 1595, 1453, 1341, 1641, 1096, 1024, 770, 701, 673  $\text{cm}^{-1}$ ;  $^1\text{H}$  NMR (400 MHz,  $\text{CDCl}_3$ )  $\delta$  7.79 (dd,  $J = 39.8, 7.4$  Hz, 4H), 7.34 (d,  $J = 8.0$  Hz, 2H), 7.28 (d,  $J = 7.2$  Hz, 3H), 7.24 – 7.21 (m, 4H), 6.86 (s, 1H), 4.40 (d,  $J = 9.2$  Hz, 2H), 3.84 – 3.72 (m, 3H), 3.54 (d,  $J = 11.6$  Hz, 2H), 3.14 (s, 2H), 2.46 (s, 2H), 0.95 – 0.87 (m, 3H) ppm.  $^{13}\text{C}\{^1\text{H}\}$  NMR (100 MHz,  $\text{CDCl}_3$ )  $\delta$  174.8, 144.0, 142.1, 141.1, 138.2, 137.6, 129.9, 128.7, 128.6, 128.3, 127.5, 127.2, 126.5, 126.2, 125.2, 123.5, 121.5, 120.6, 68.8, 60.9, 50.5, 44.3, 39.9, 21.6, 13.6 ppm. HRMS (ESI-TOF)  $m/z$   $[\text{M} + \text{Na}]^+$  calcd for  $\text{C}_{29}\text{H}_{30}\text{NO}_5\text{S}^+$  504.1839, found 504.1874.

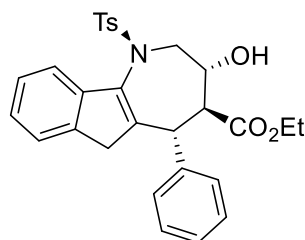

**Ethyl 3-hydroxy-5-phenyl-1-tosyl-1,2,3,4,5,6-hexahydroindeno[1,2-b]azepine-4-carboxylate (6)**

White solid: 25 mg (yield 25%); mp 194-196 °C; IR (KBr) 3452, 2979, 2931, 1704, 1596, 1459,

1362, 1166, 1024, 814, 765, 663  $\text{cm}^{-1}$ ;  $^1\text{H}$  NMR (400 MHz,  $\text{CDCl}_3$ )  $\delta$  8.00 – 7.71 (m, 2H), 7.67 – 7.35 (m, 3H), 7.34 – 7.27 (m, 2H), 7.24 – 6.53 (m, 5H), 4.51 (d,  $J = 14.8$  Hz, 1H), 4.41 – 3.93 (m, 2H), 3.81 – 3.63 (m, 2H), 3.26 – 2.80 (m, 3H), 2.69 – 2.42 (m, 5H), 0.79 (t,  $J = 7.0$  Hz, 3H) ppm.  $^{13}\text{C}\{^1\text{H}\}$  NMR (100 MHz,  $\text{CDCl}_3$ )  $\delta$  172.7, 145.2, 144.1, 142.0, 140.5, 139.0, 138.0, 137.5, 129.9, 128.8, 128.3, 127.7, 127.4, 126.5, 125.3, 123.3, 121.0, 71.2, 60.6, 55.3, 53.7, 43.5, 40.2, 21.7, 13.6 ppm. HRMS (ESI-TOF)  $m/z$   $[\text{M} + \text{Na}]^+$  calcd for  $\text{C}_{29}\text{H}_{30}\text{NO}_5\text{S}^+$  504.1839, found 504.1855.

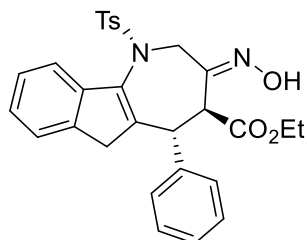

**Ethyl (*E*)-3-(hydroxyimino)-5-phenyl-1-tosyl-1,2,3,4,5,6-hexahydroindeno[1,2-*b*]azepine-4-carboxylate (7)**

White solid: 40 mg (yield 52%); mp 235-237  $^{\circ}\text{C}$ ; IR (KBr) 3308, 2984, 1731, 1338, 1161, 1093, 852, 729, 668  $\text{cm}^{-1}$ ;  $^1\text{H}$  NMR (400 MHz,  $\text{DMSO-}d_6$ )  $\delta$  11.48 (s, 1H), 7.95 (d,  $J = 8.4$  Hz, 2H), 7.54 (d,  $J = 8.4$  Hz, 2H), 7.35 – 7.23 (m, 6H), 7.17 – 7.09 (m, 2H), 6.93 – 6.88 (m, 1H), 4.85 (d,  $J = 18.8$  Hz, 1H), 4.59 (d,  $J = 18.8$  Hz, 1H), 4.29 (d,  $J = 11.6$  Hz, 1H), 4.14 (d,  $J = 12.0$  Hz, 1H), 3.91 – 3.77 (m, 2H), 3.35 (d,  $J = 23.2$  Hz, 1H), 2.81 (d,  $J = 23.2$  Hz, 1H), 2.45 (s, 3H), 0.93 (t,  $J = 7.0$  Hz, 3H) ppm.  $^{13}\text{C}\{^1\text{H}\}$  NMR (100 MHz,  $\text{DMSO-}d_6$ )  $\delta$  168.8, 153.2, 144.4, 144.0, 141.8, 141.7, 140.7, 136.9, 135.0, 130.4, 128.5, 128.4, 127.2, 127.2, 126.1, 125.1, 123.7, 119.5, 60.0, 50.5, 50.2, 48.2, 21.1, 13.8 ppm. HRMS (ESI-TOF)  $m/z$   $[\text{M} + \text{Na}]^+$  calcd for  $\text{C}_{29}\text{H}_{29}\text{N}_2\text{O}_5\text{S}^+$  517.1792, found 517.1812.

## 7. NMR spectra of all new compounds

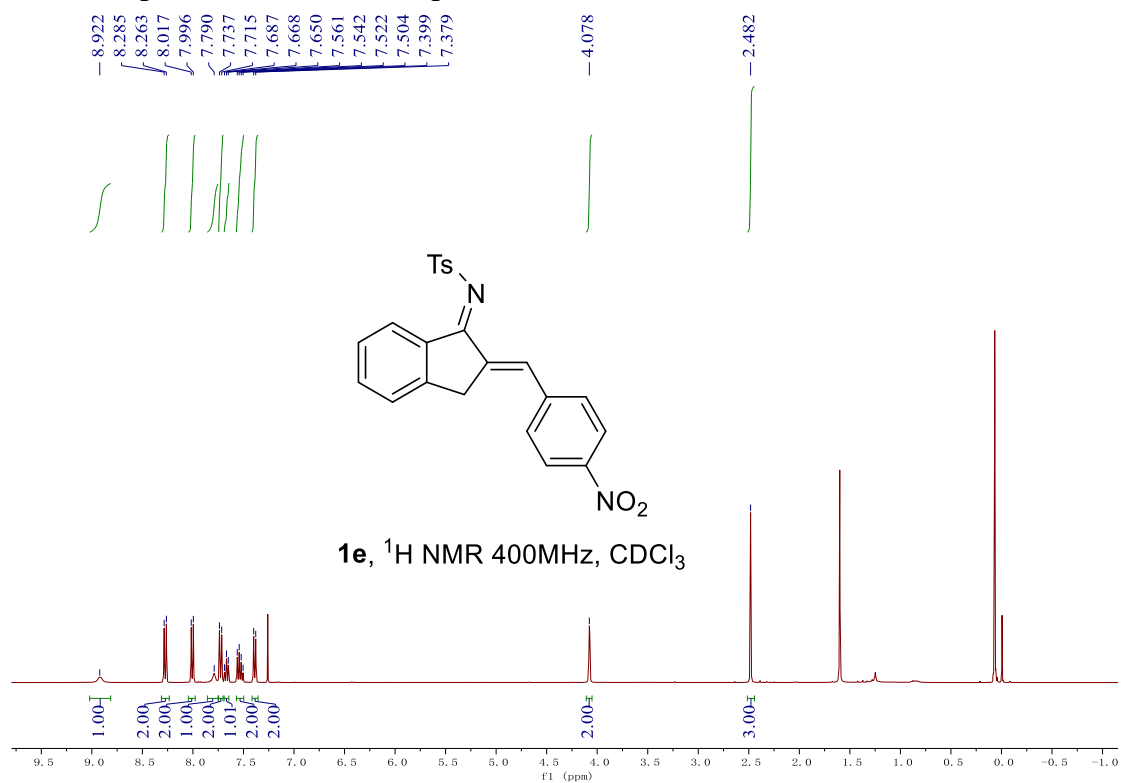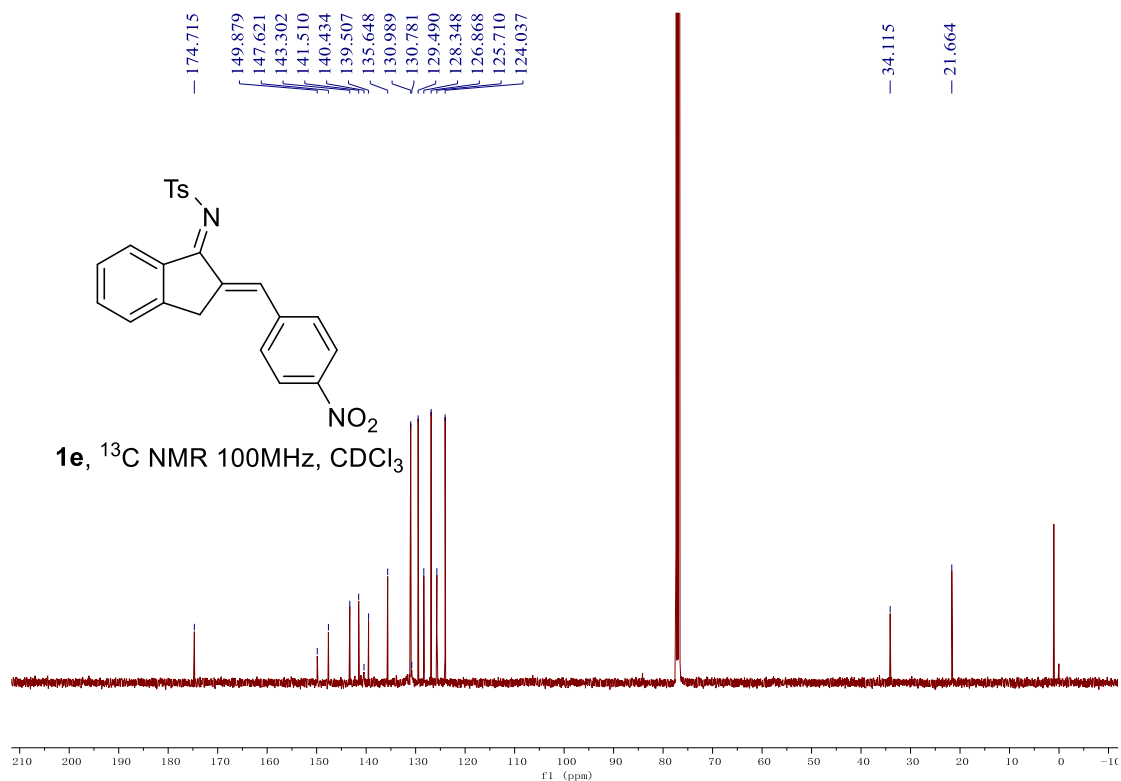



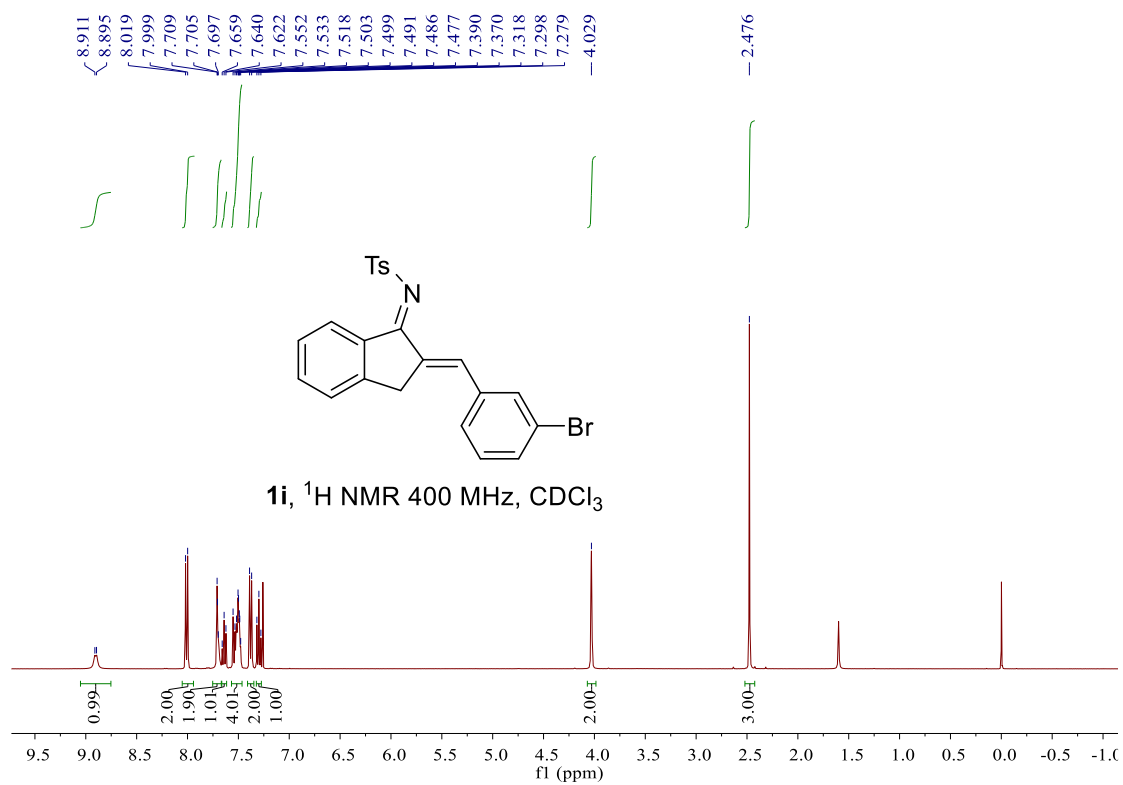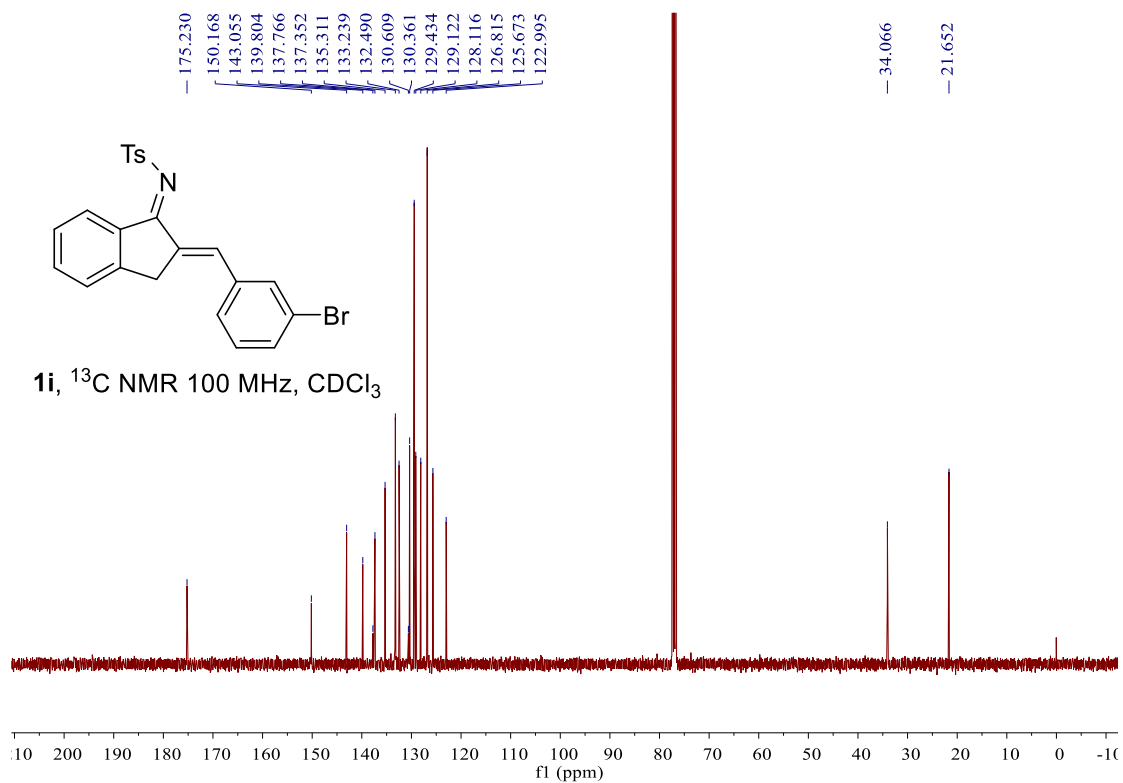

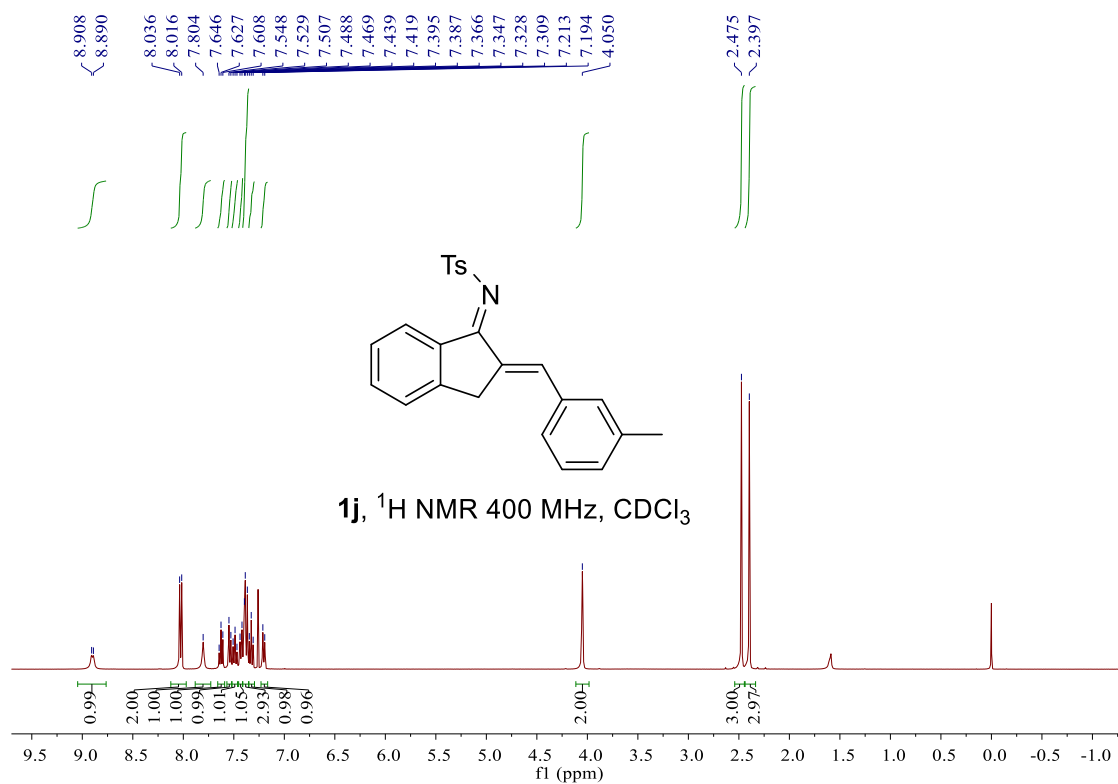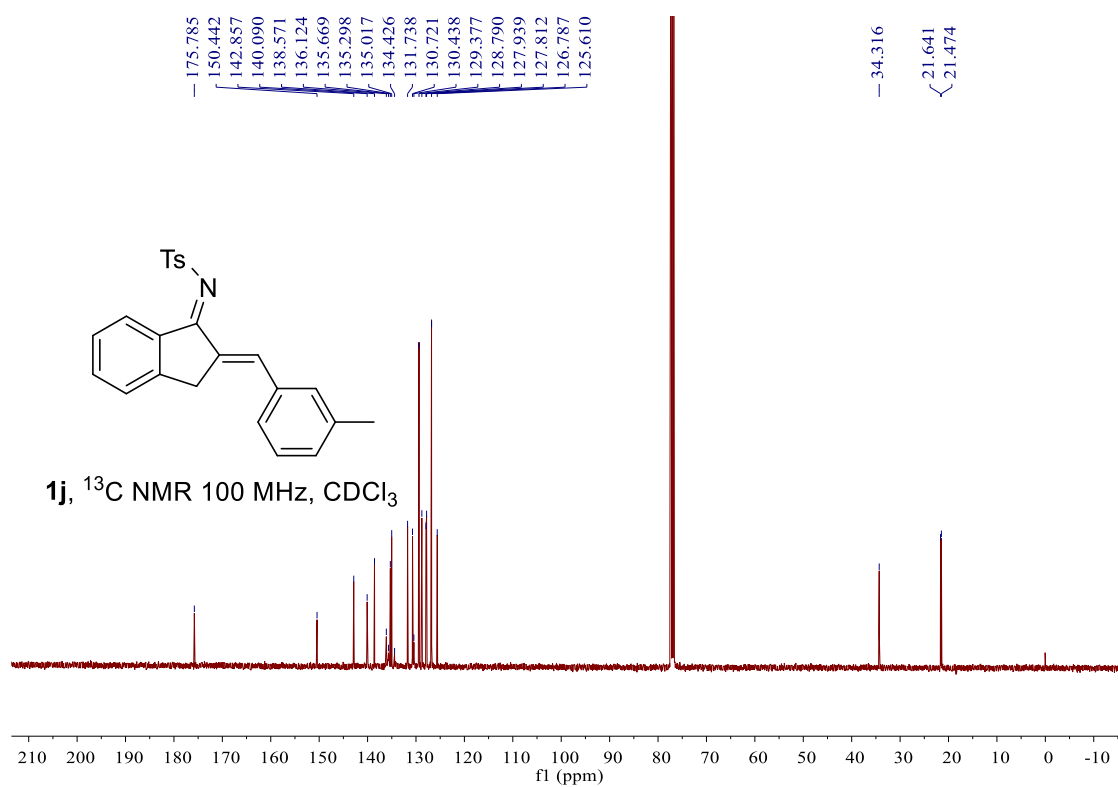

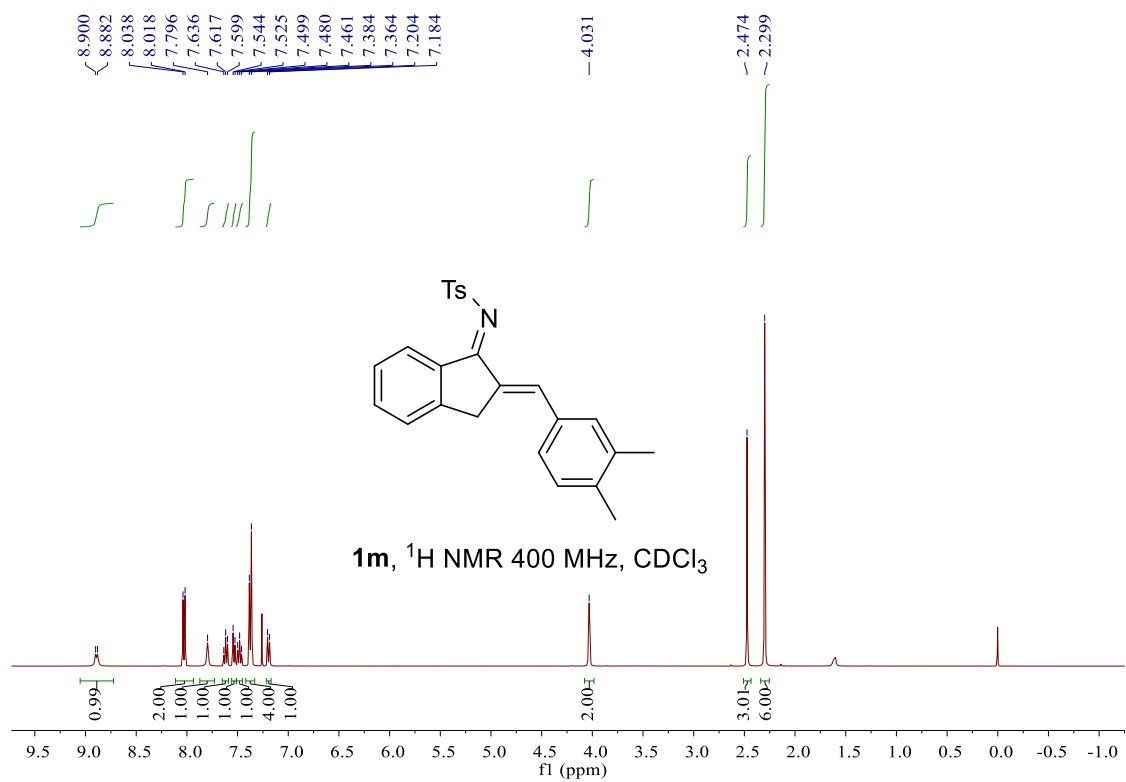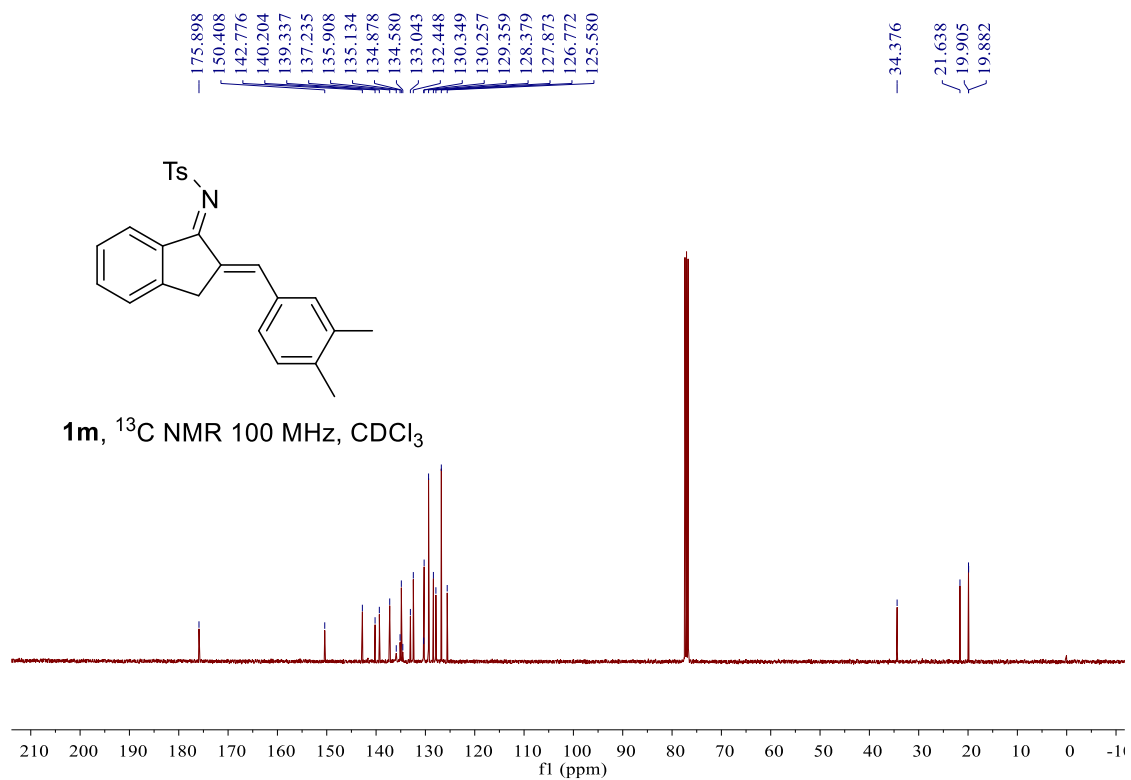

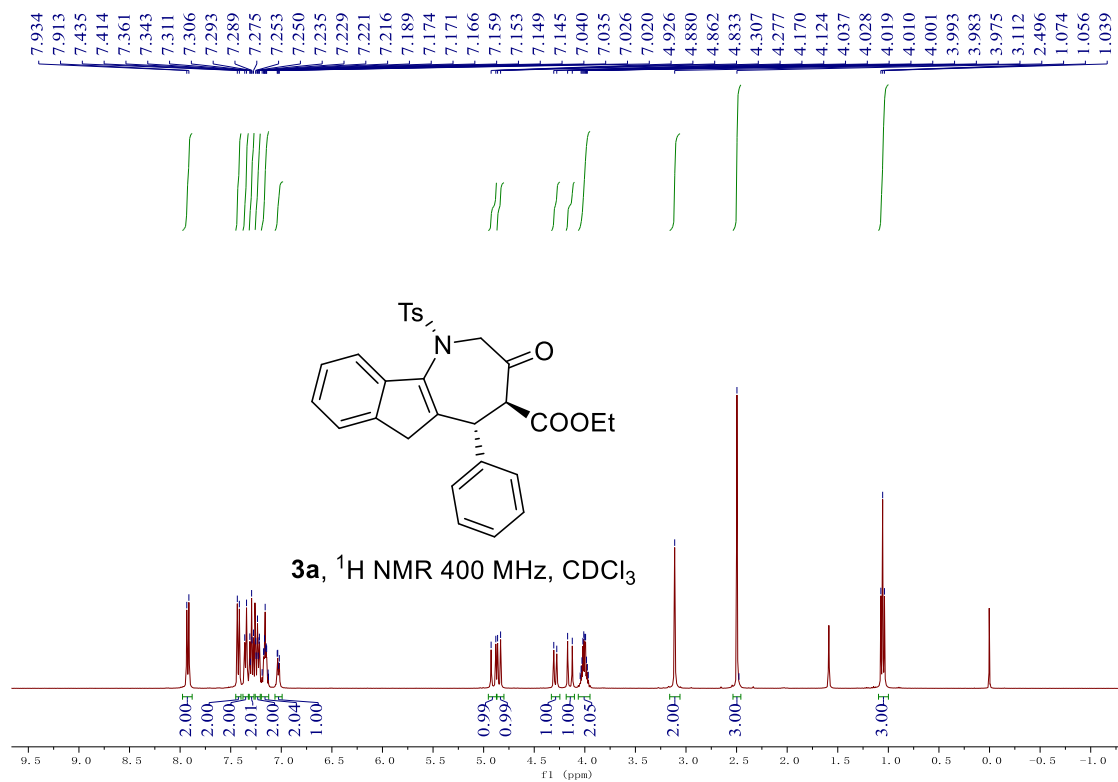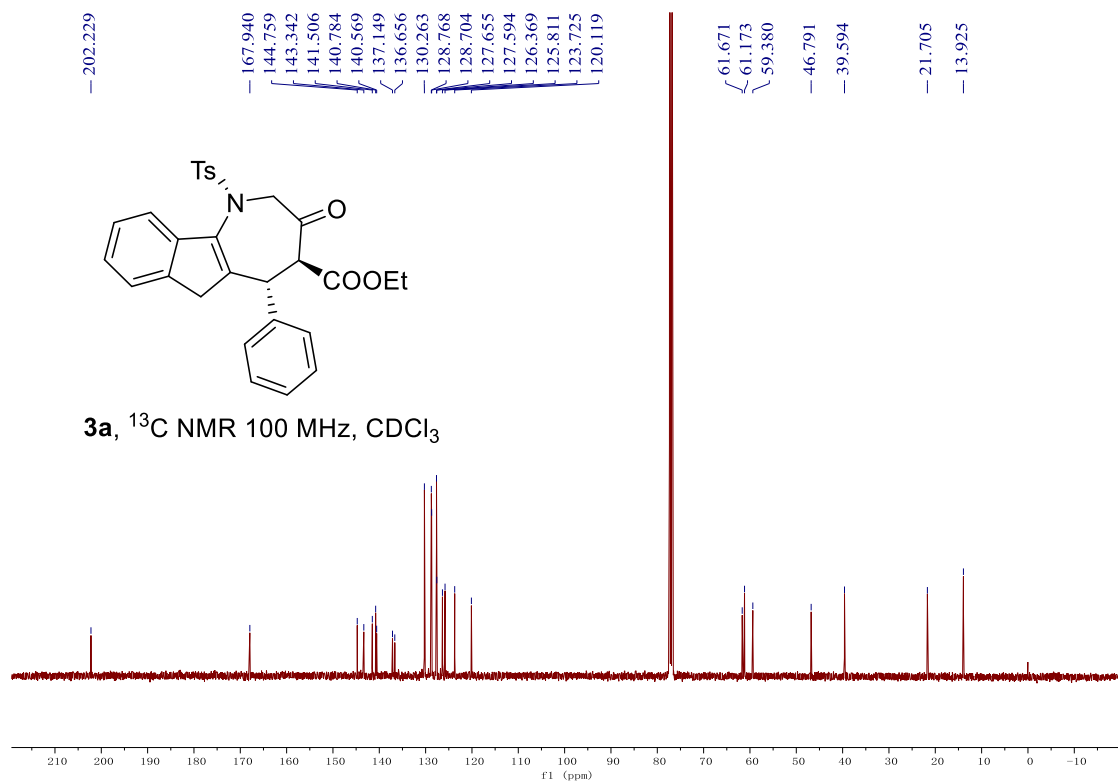

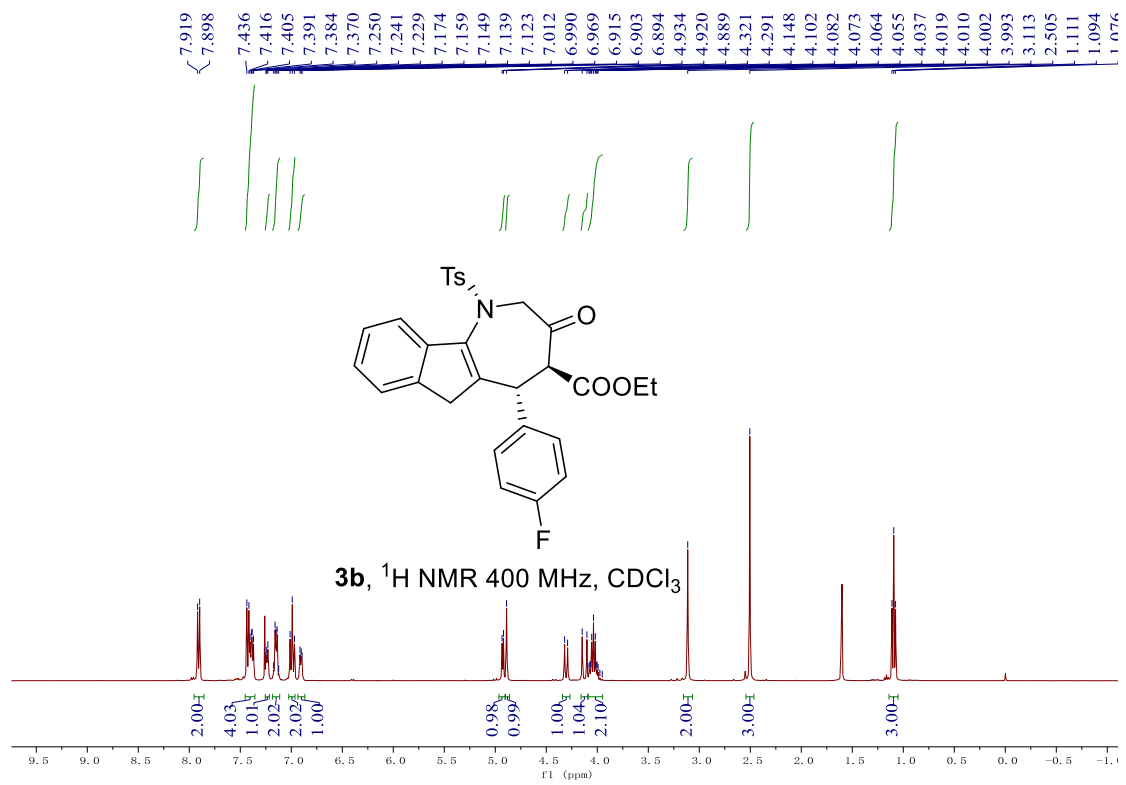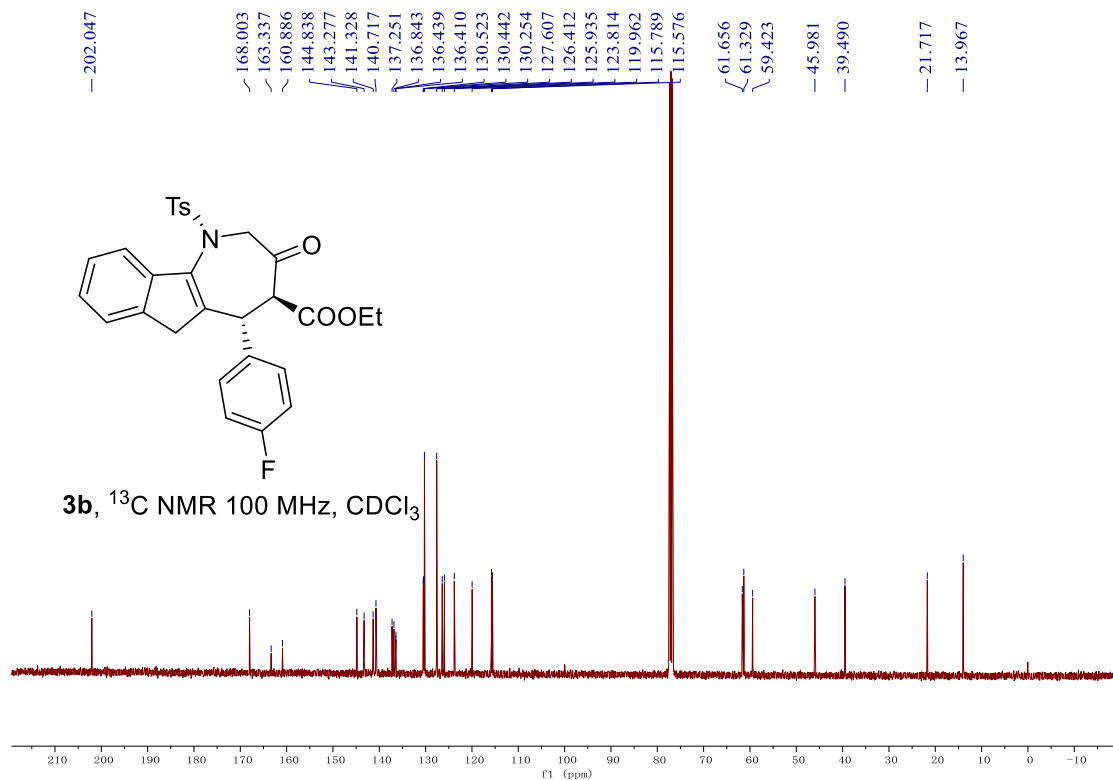

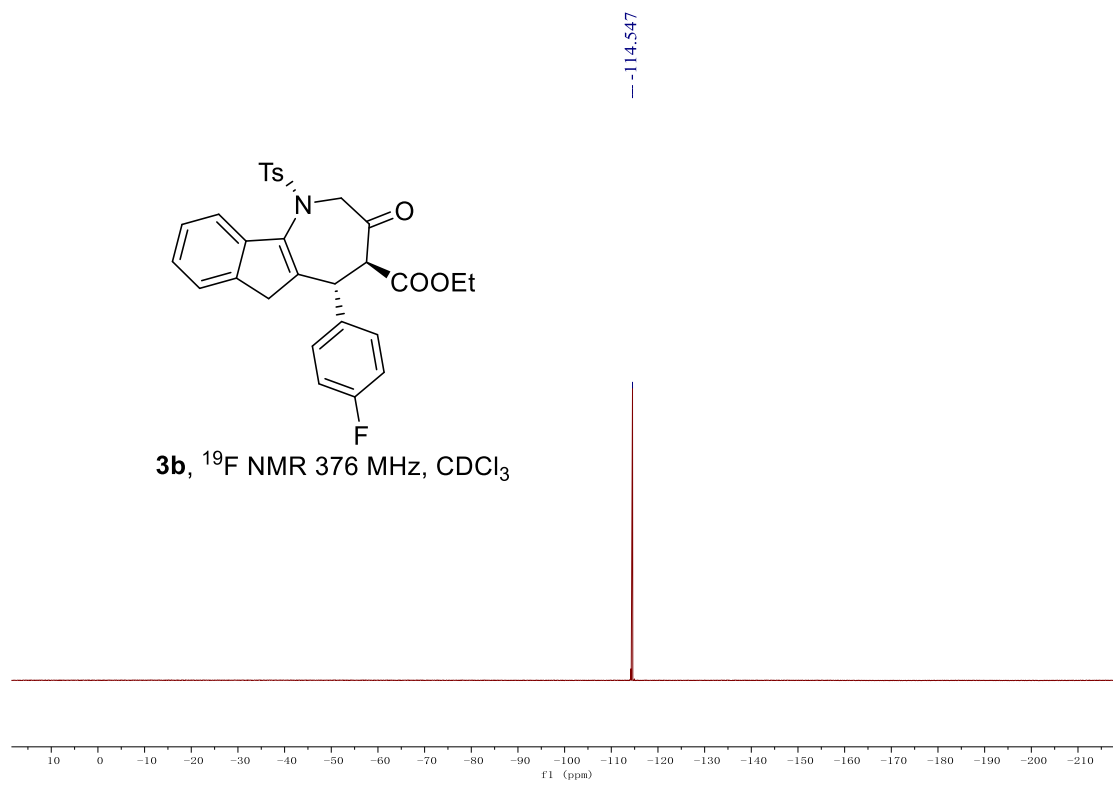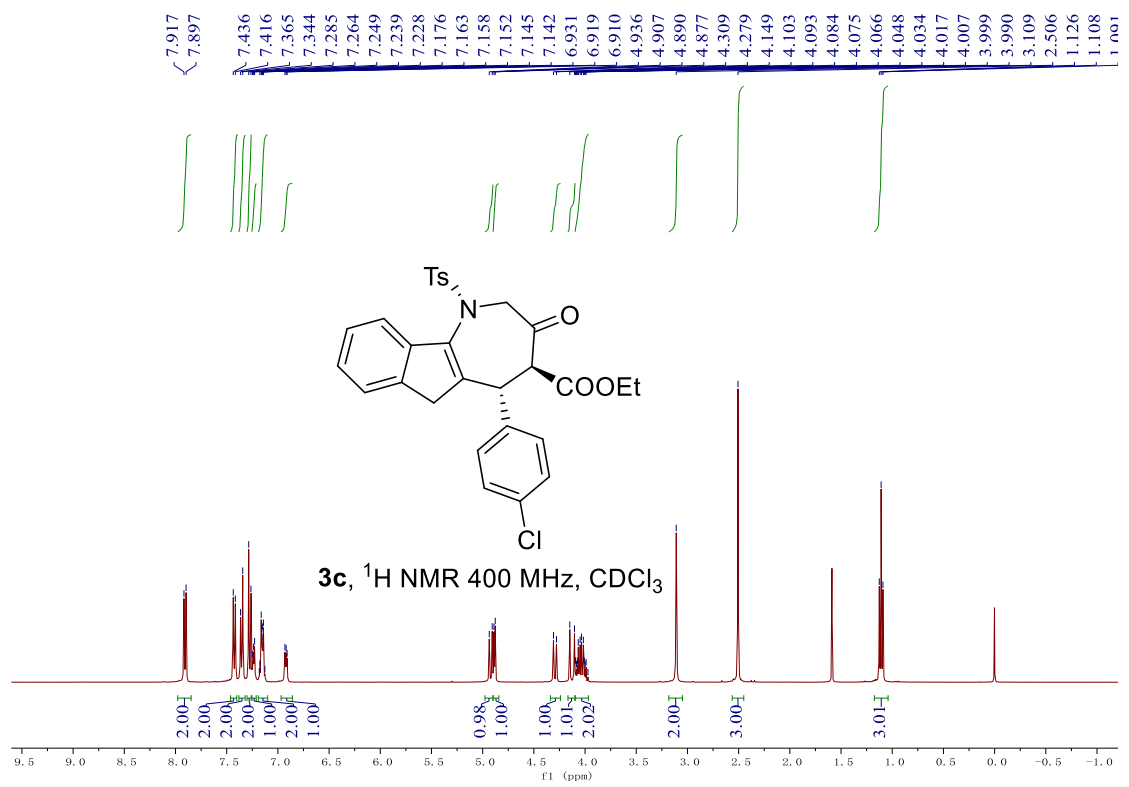

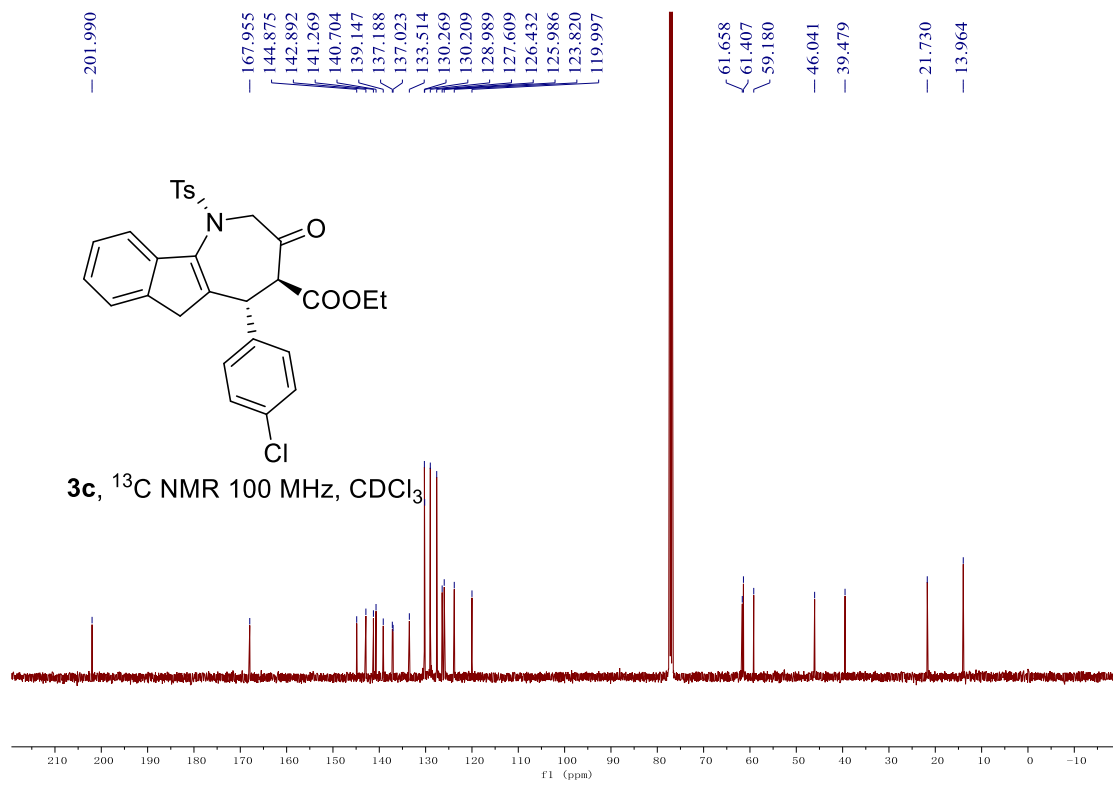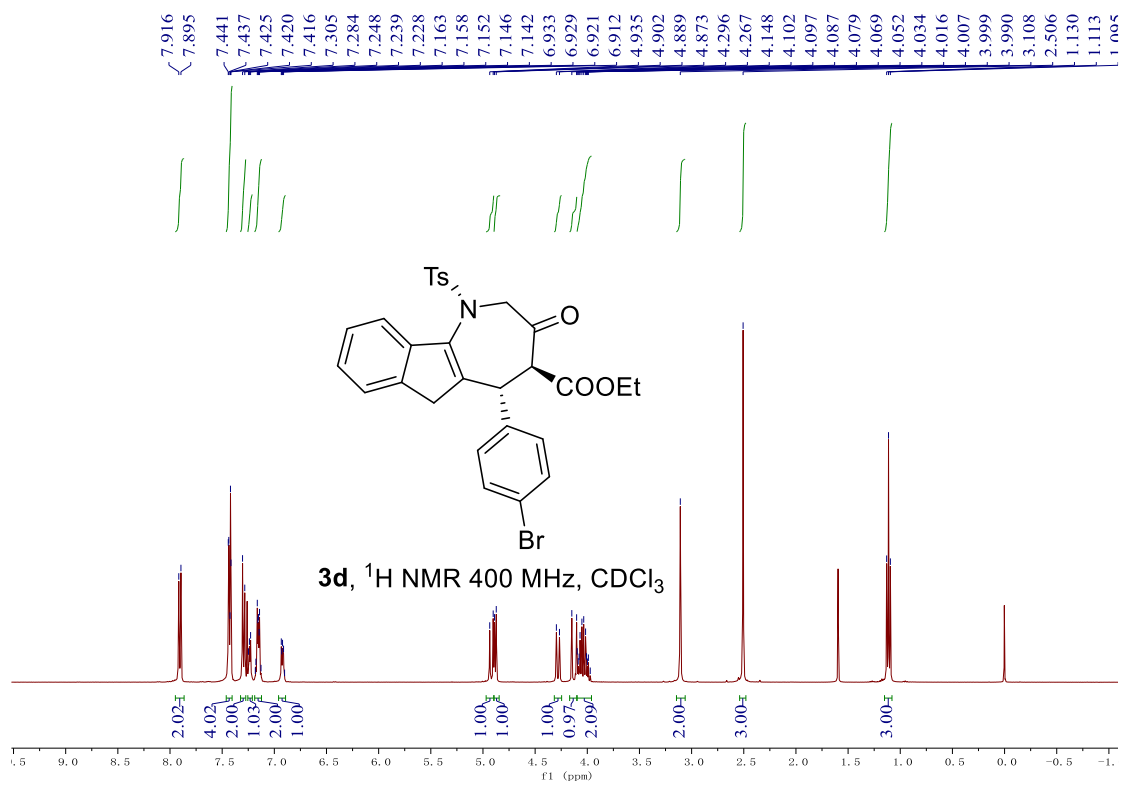

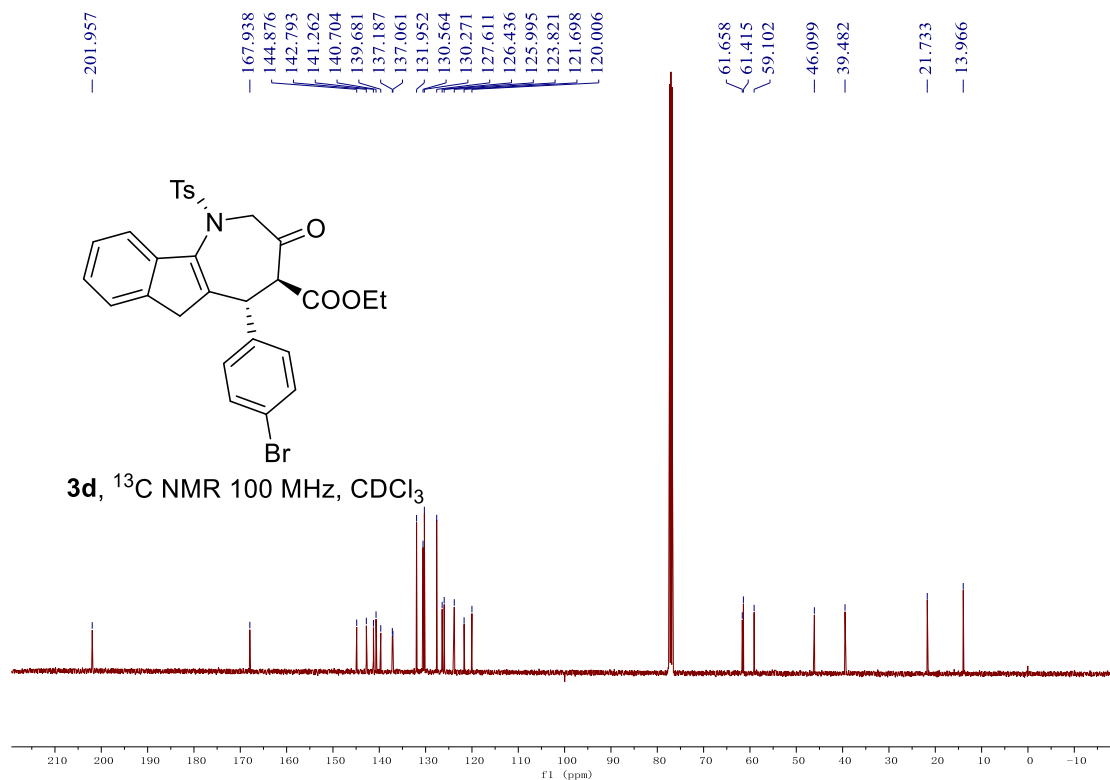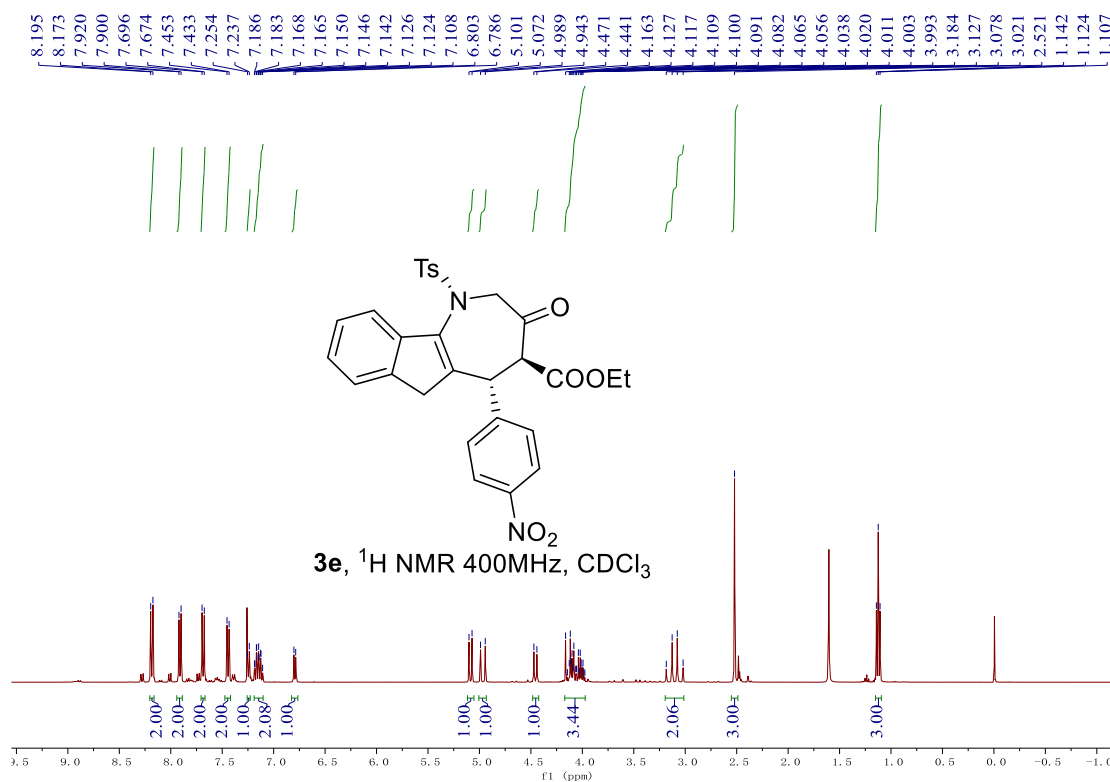



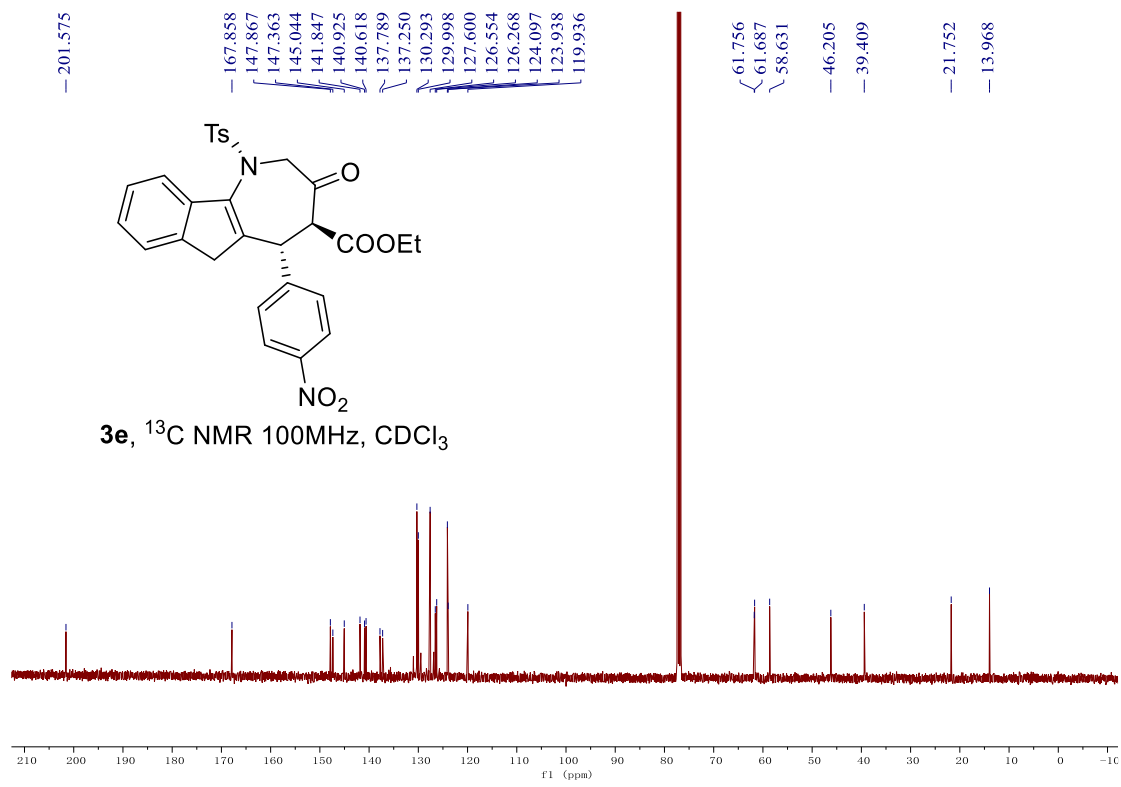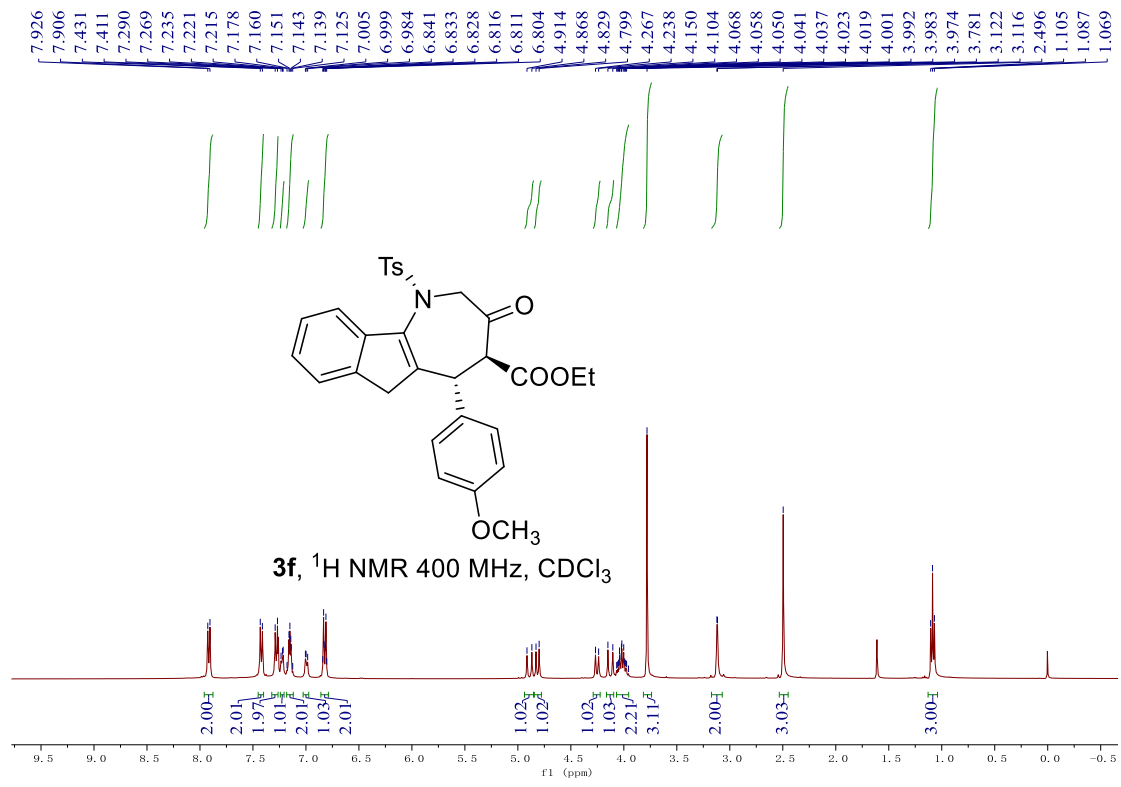

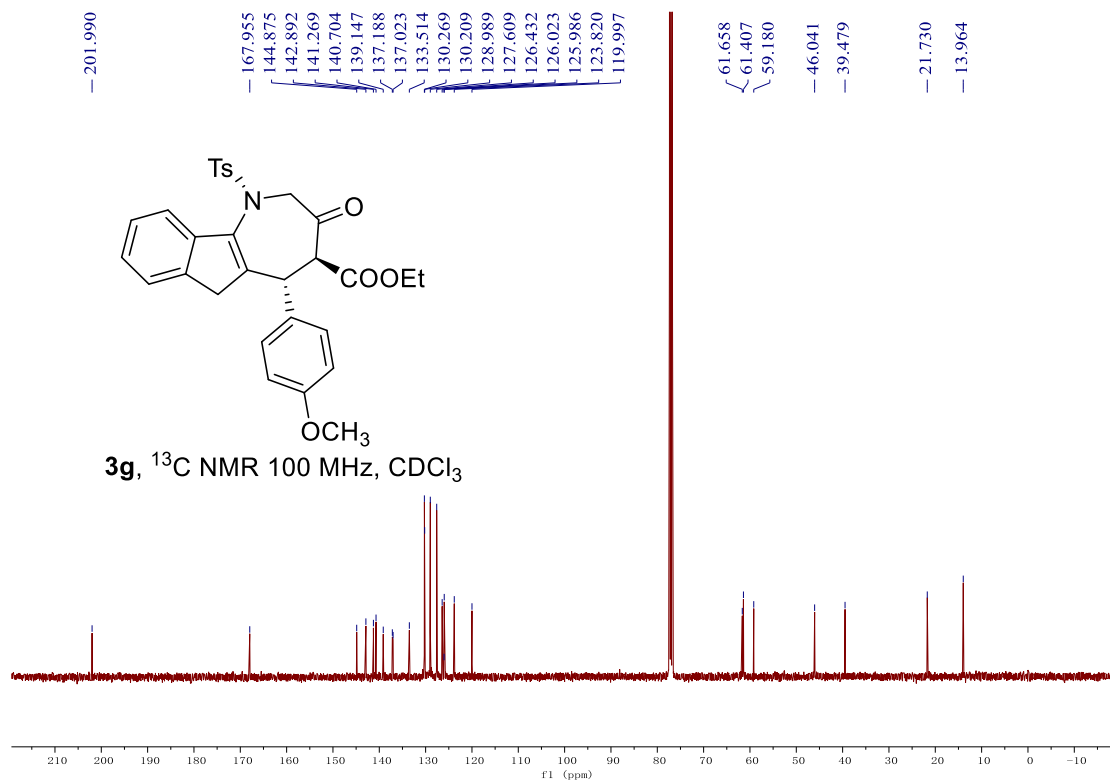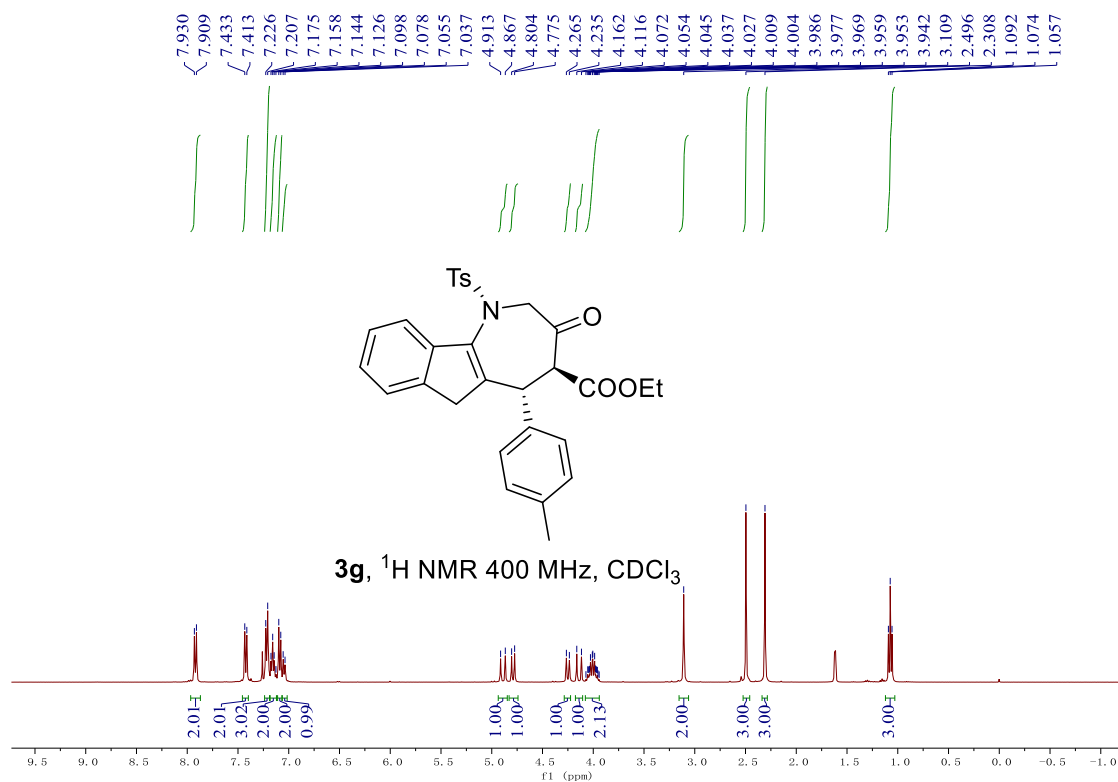

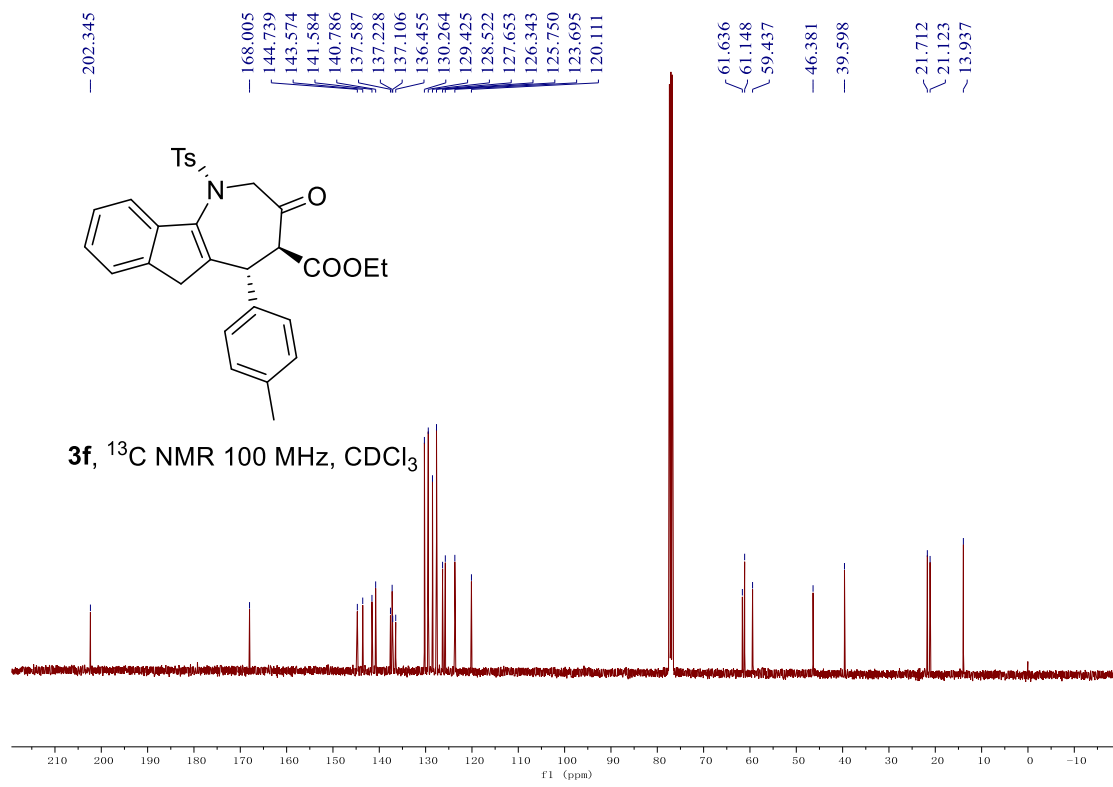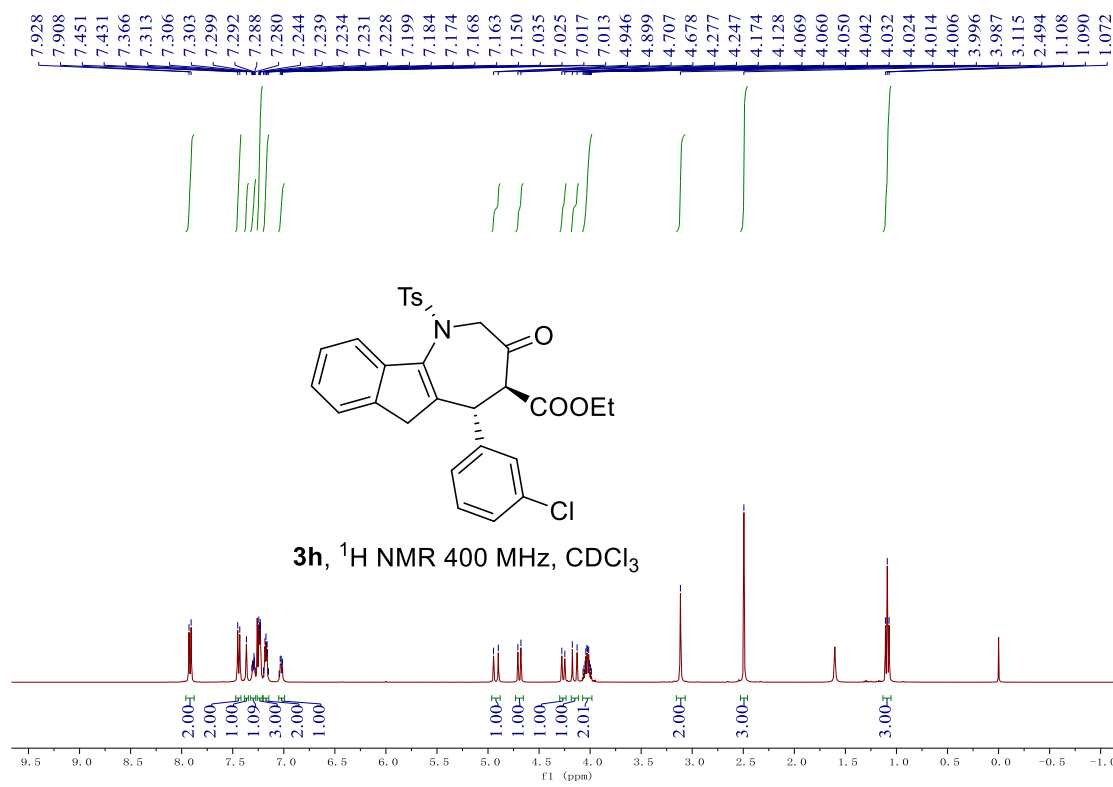

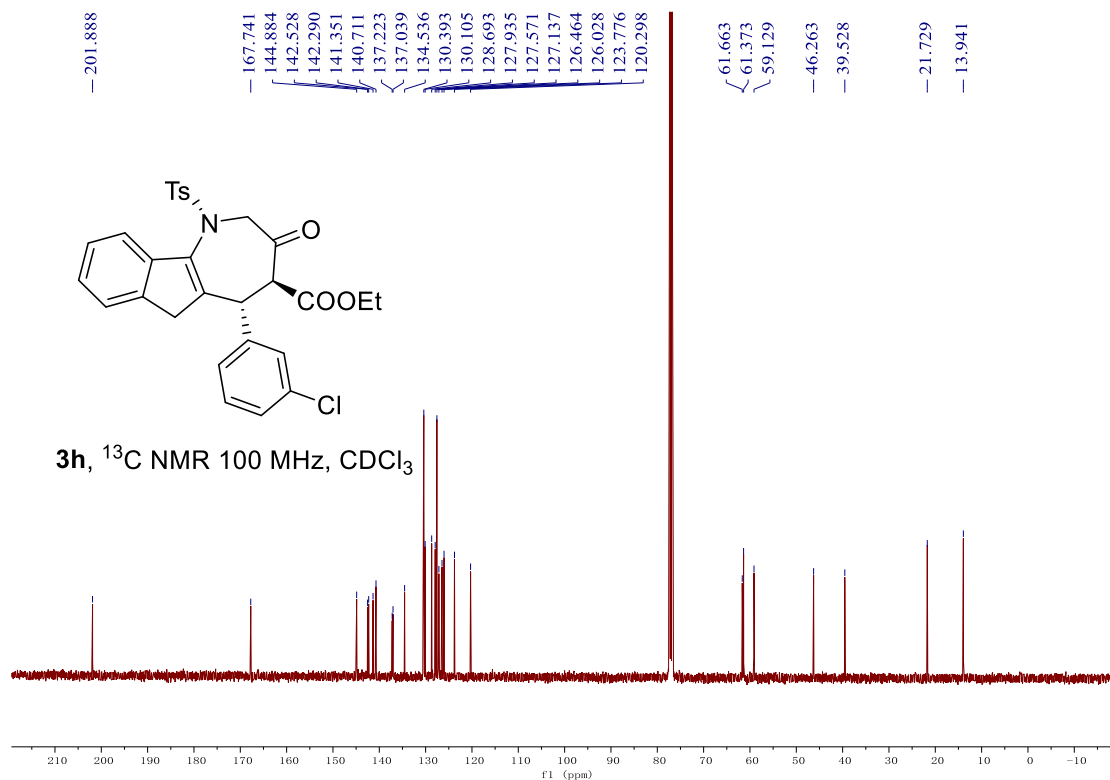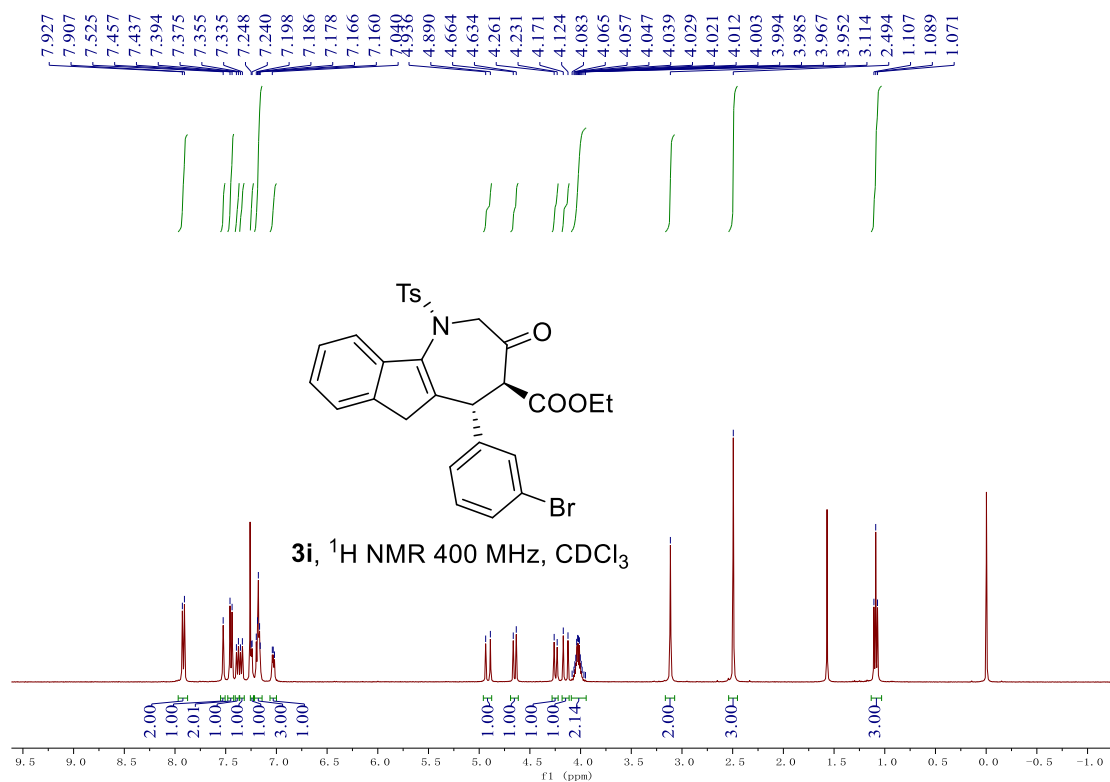

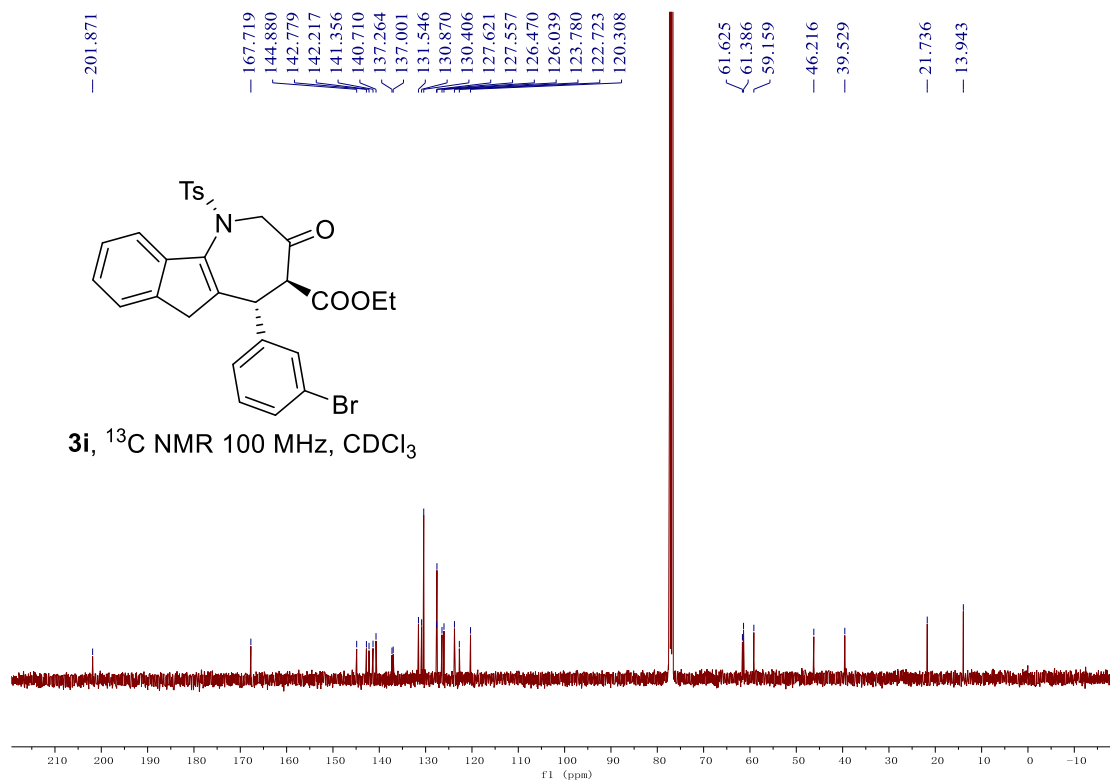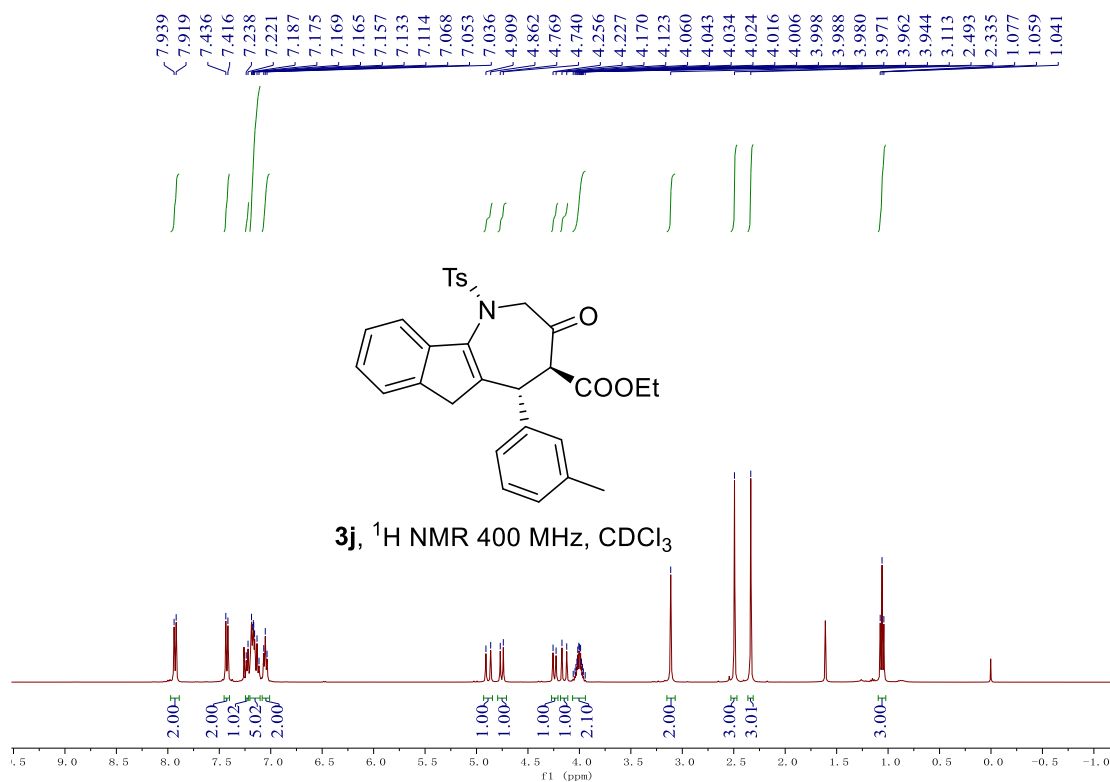

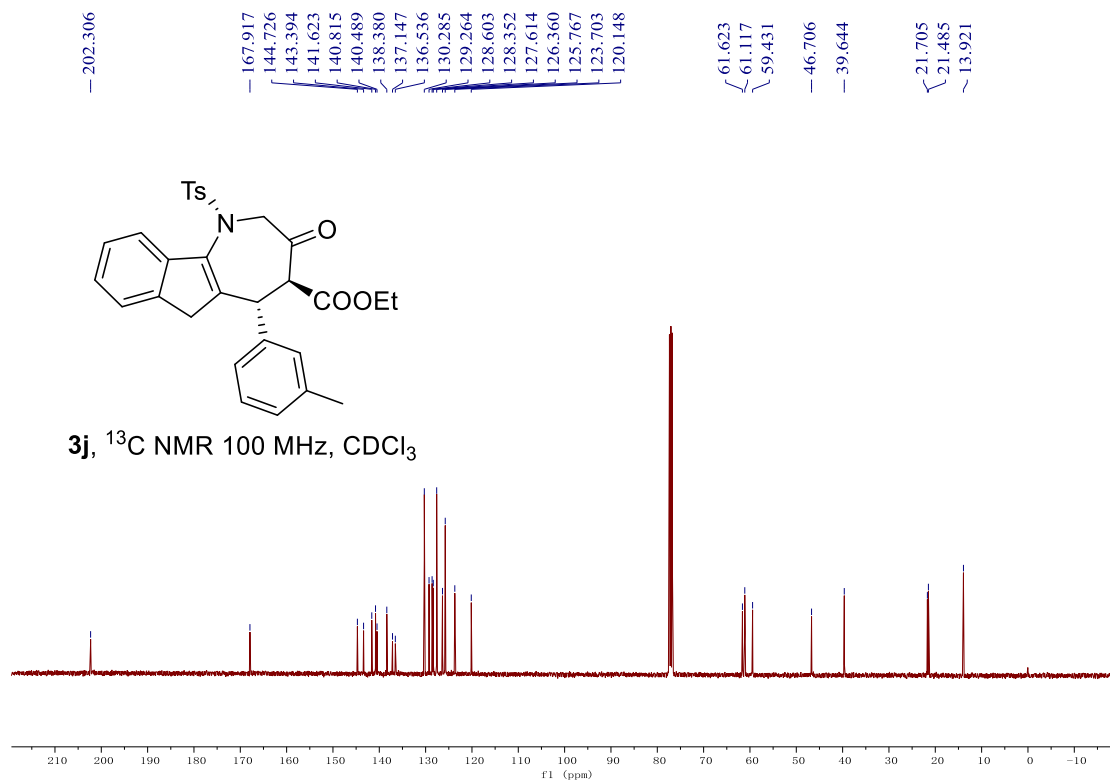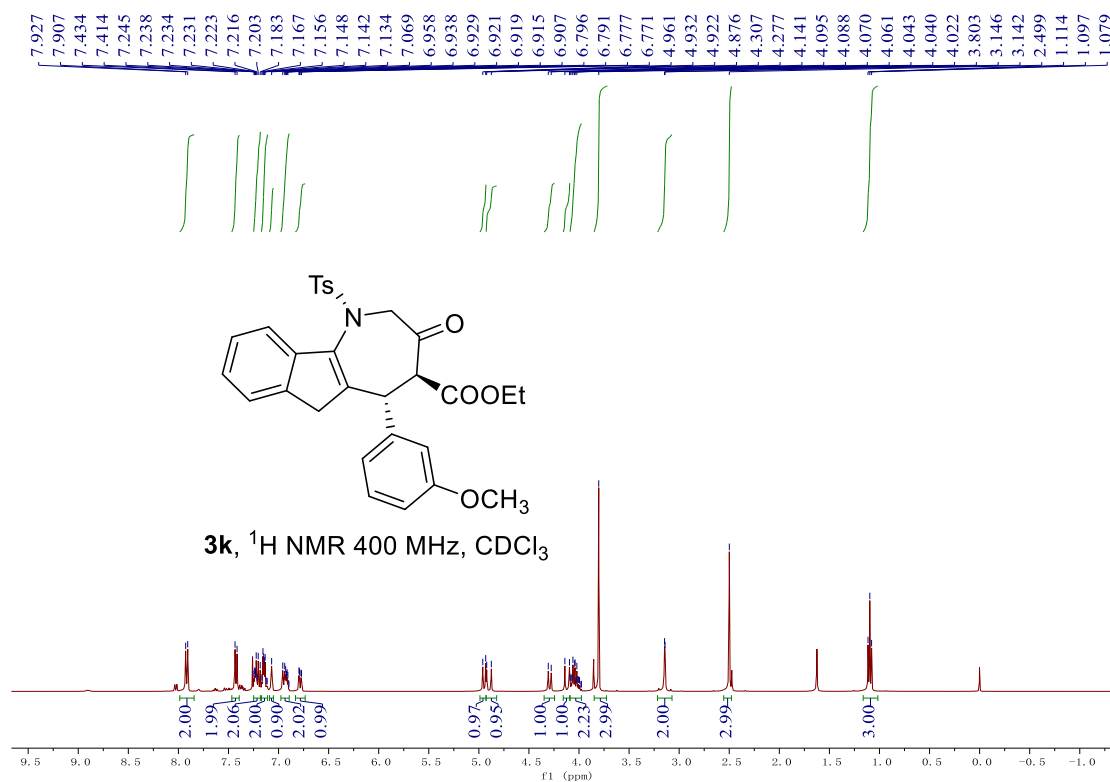

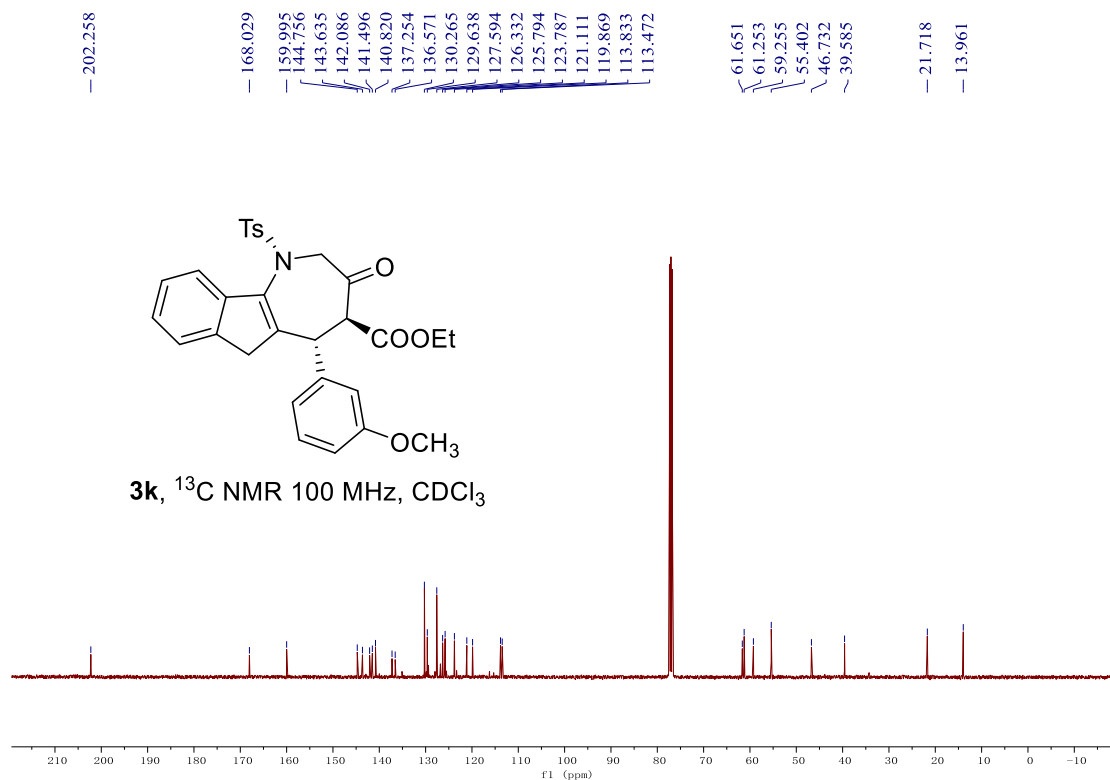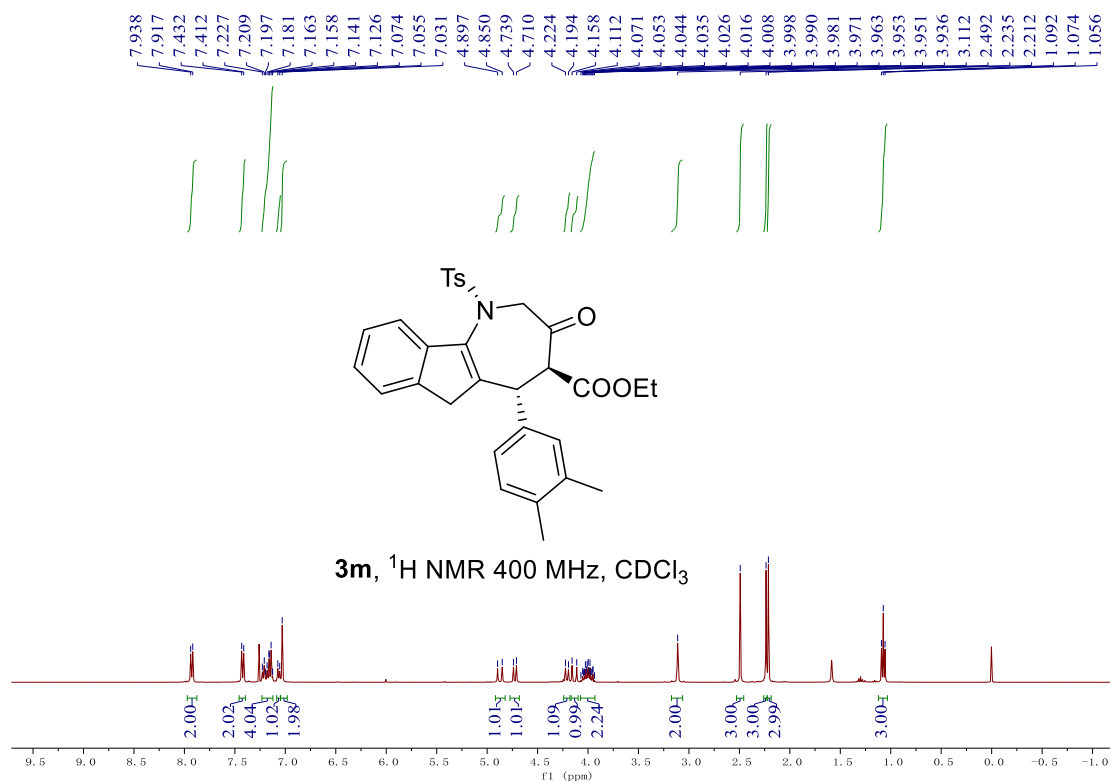

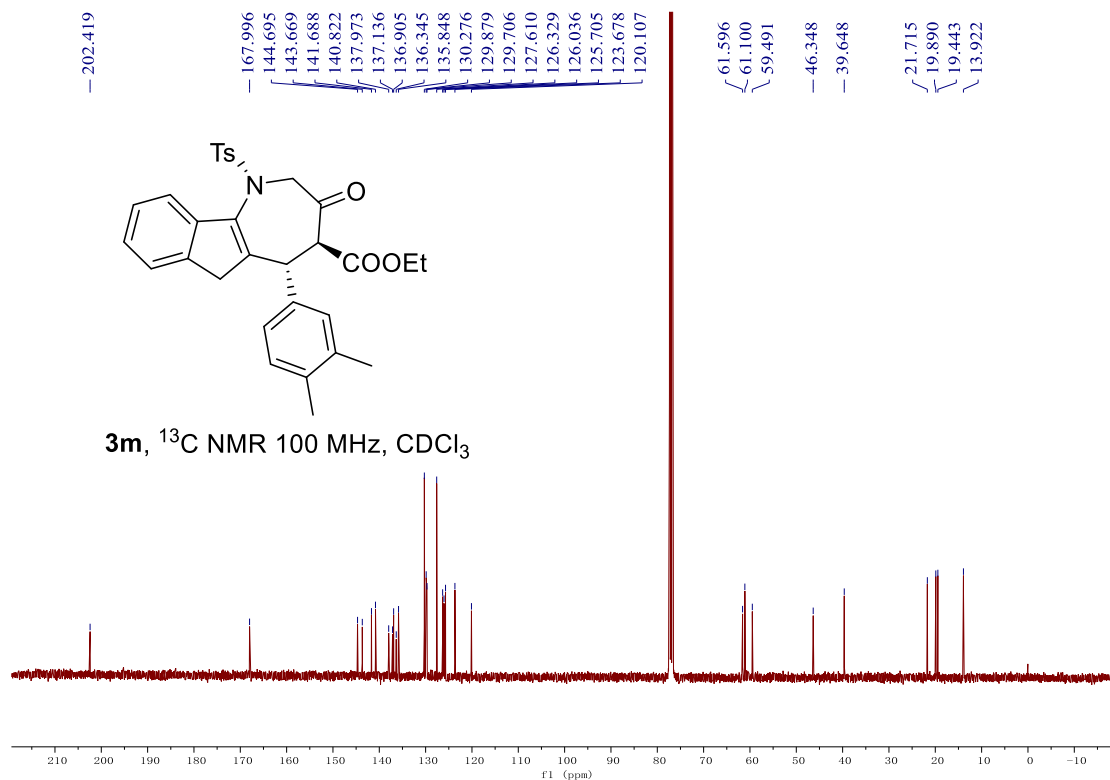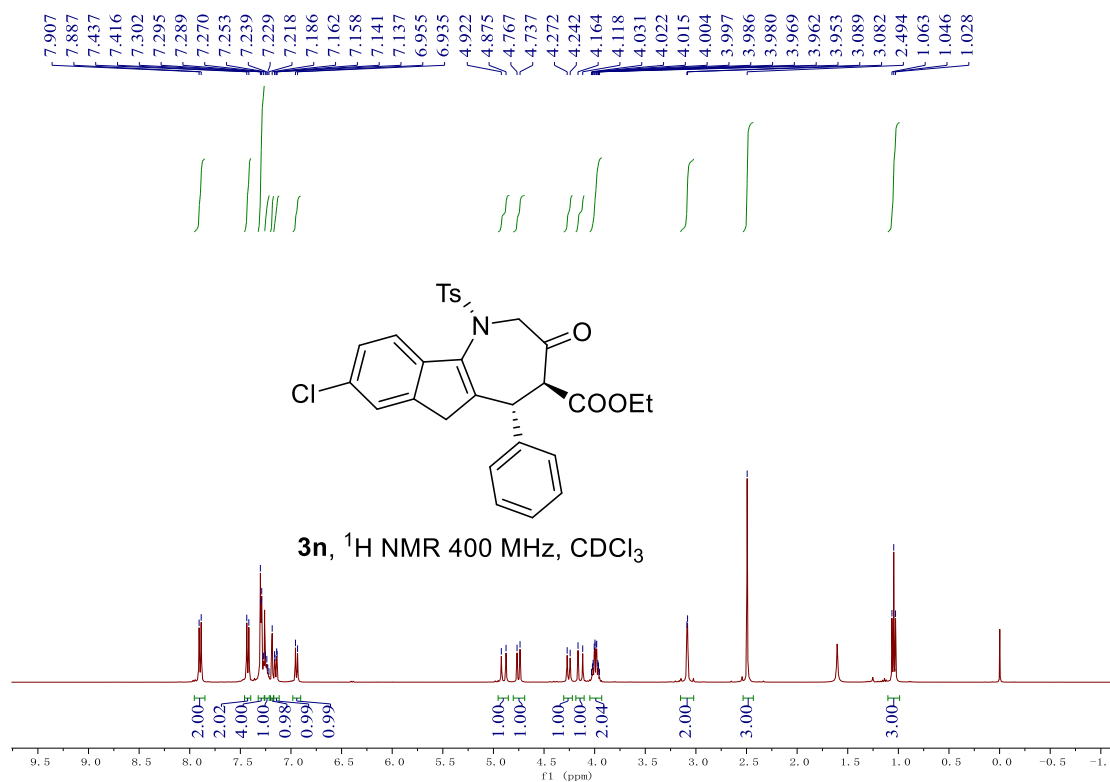



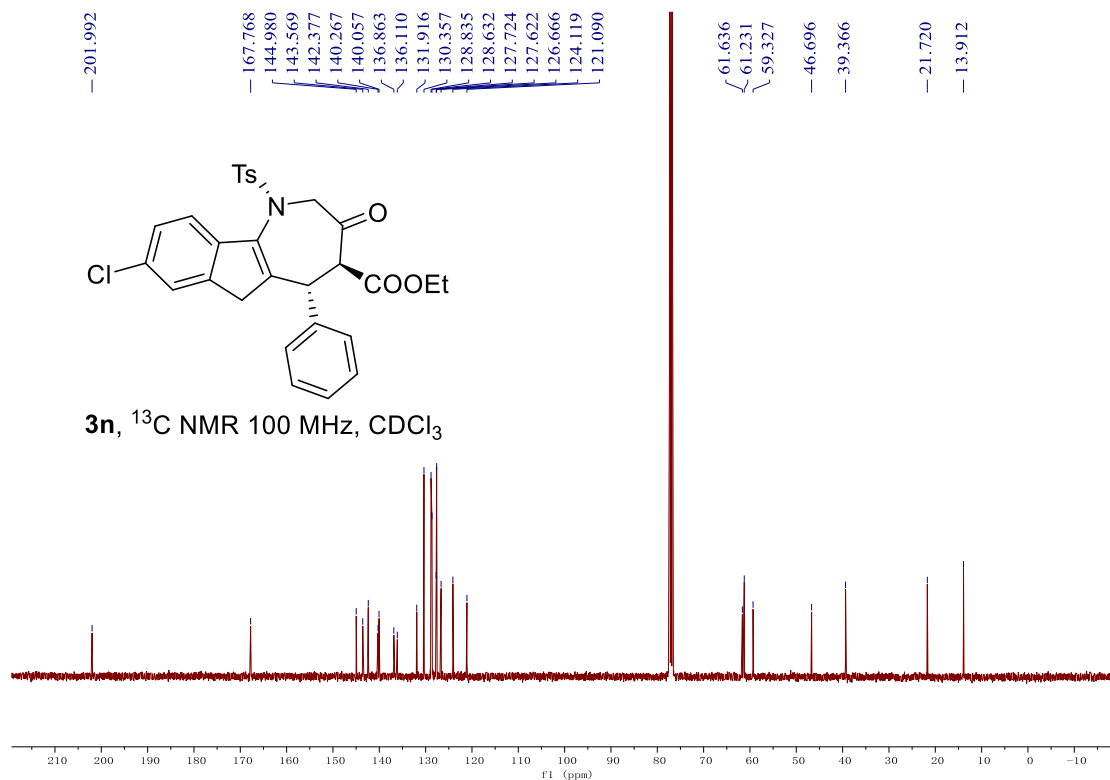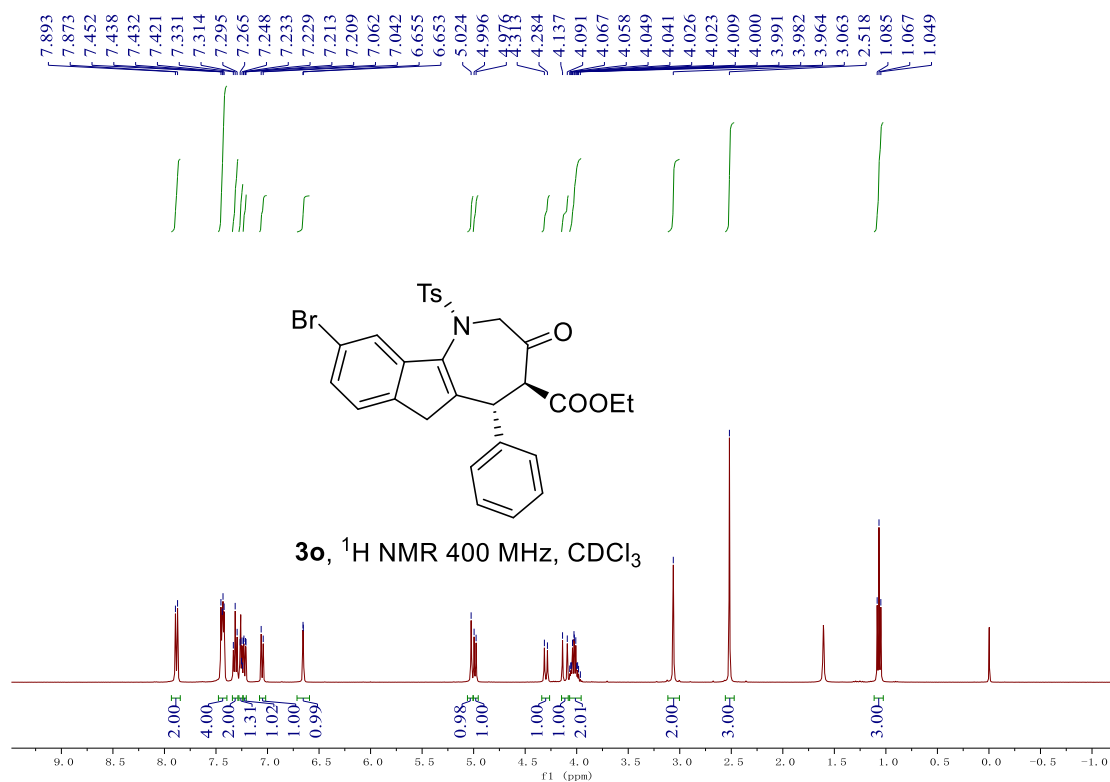

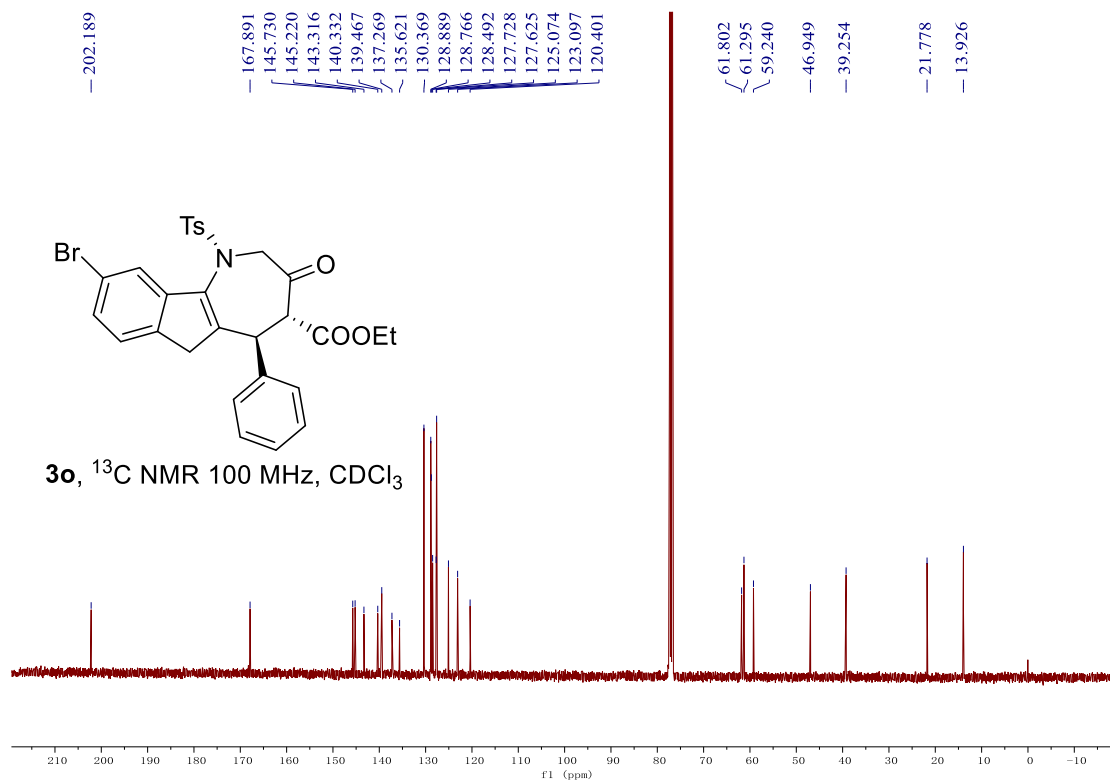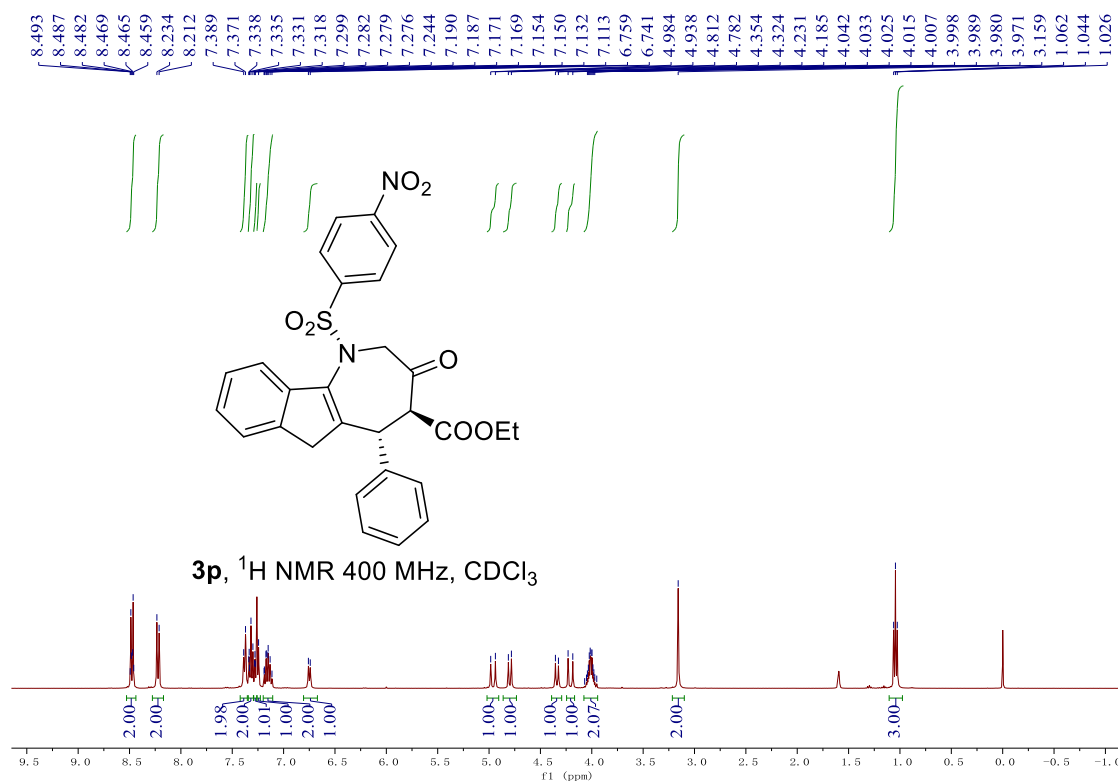

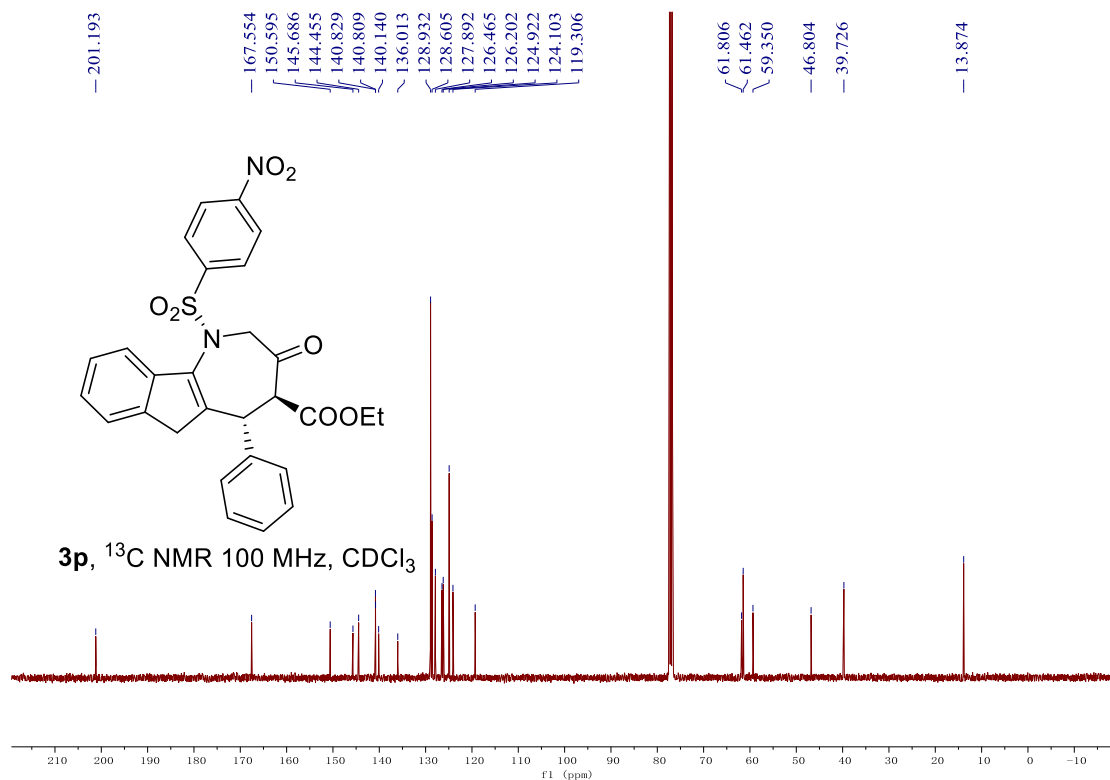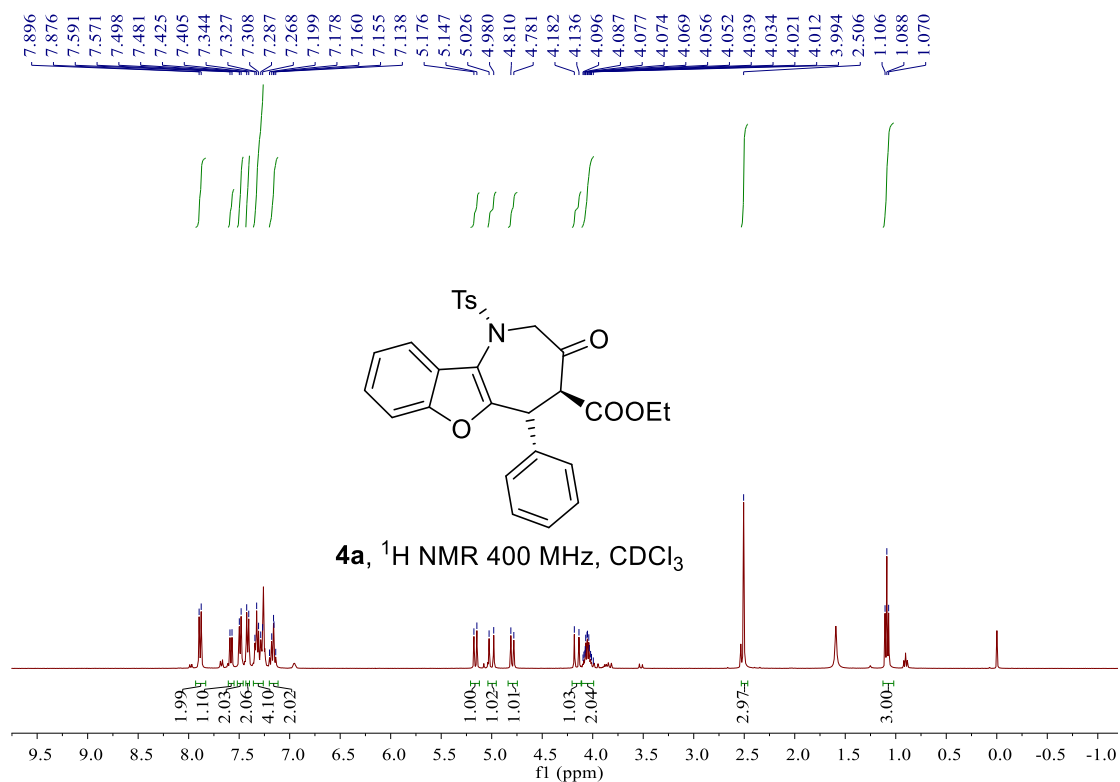

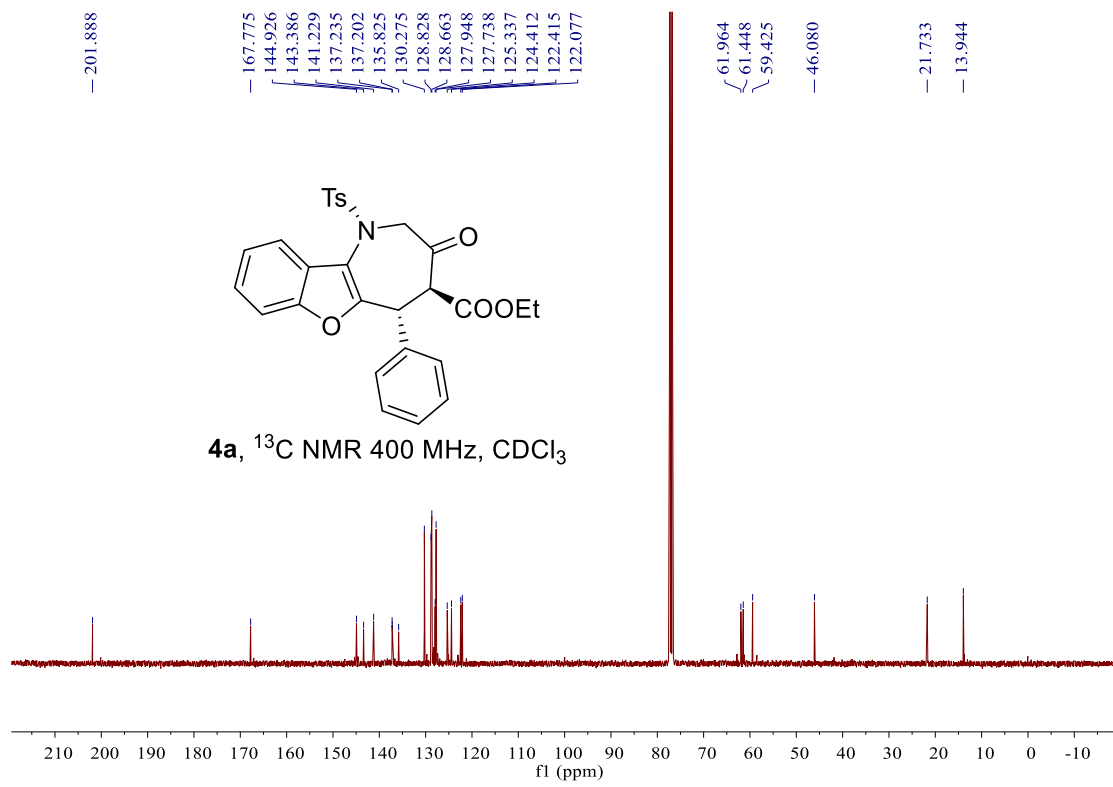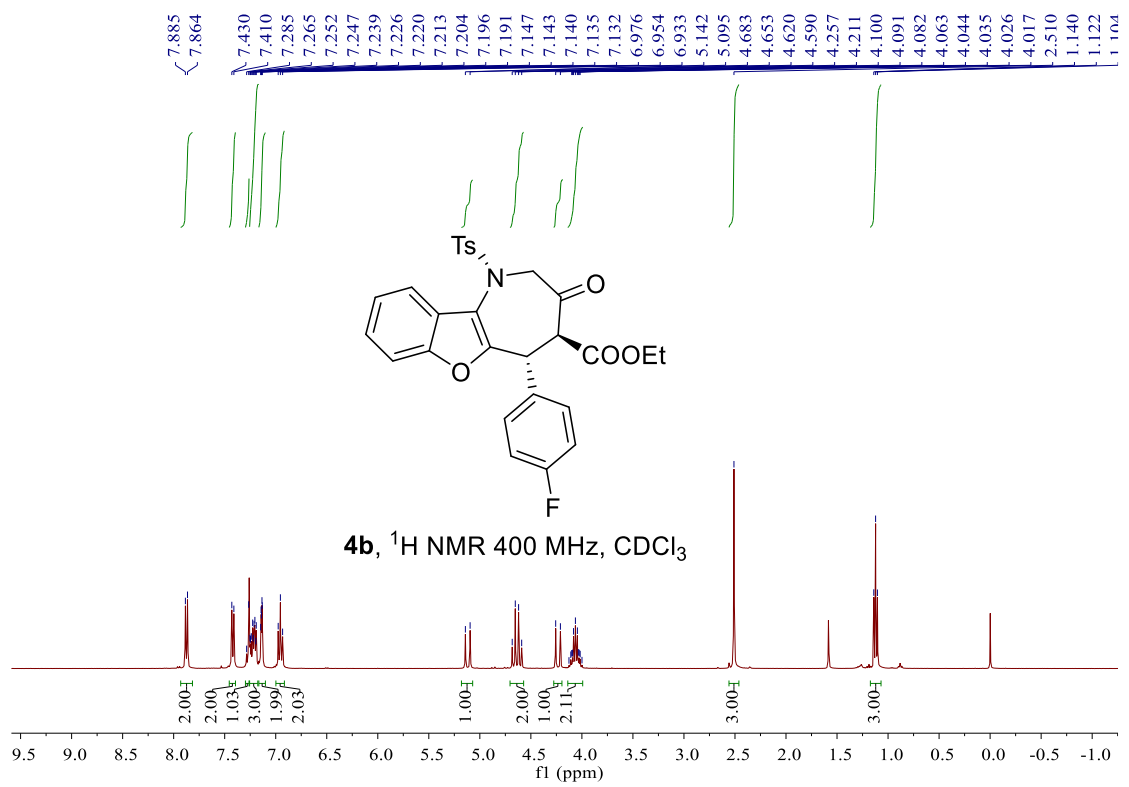

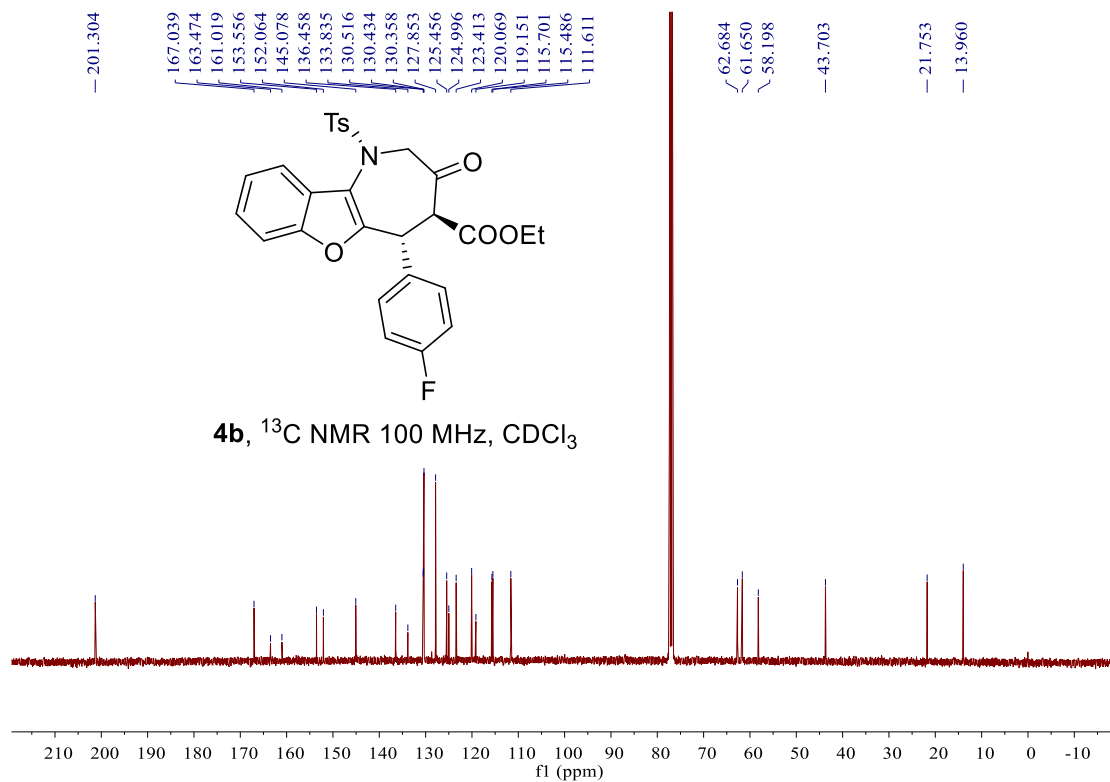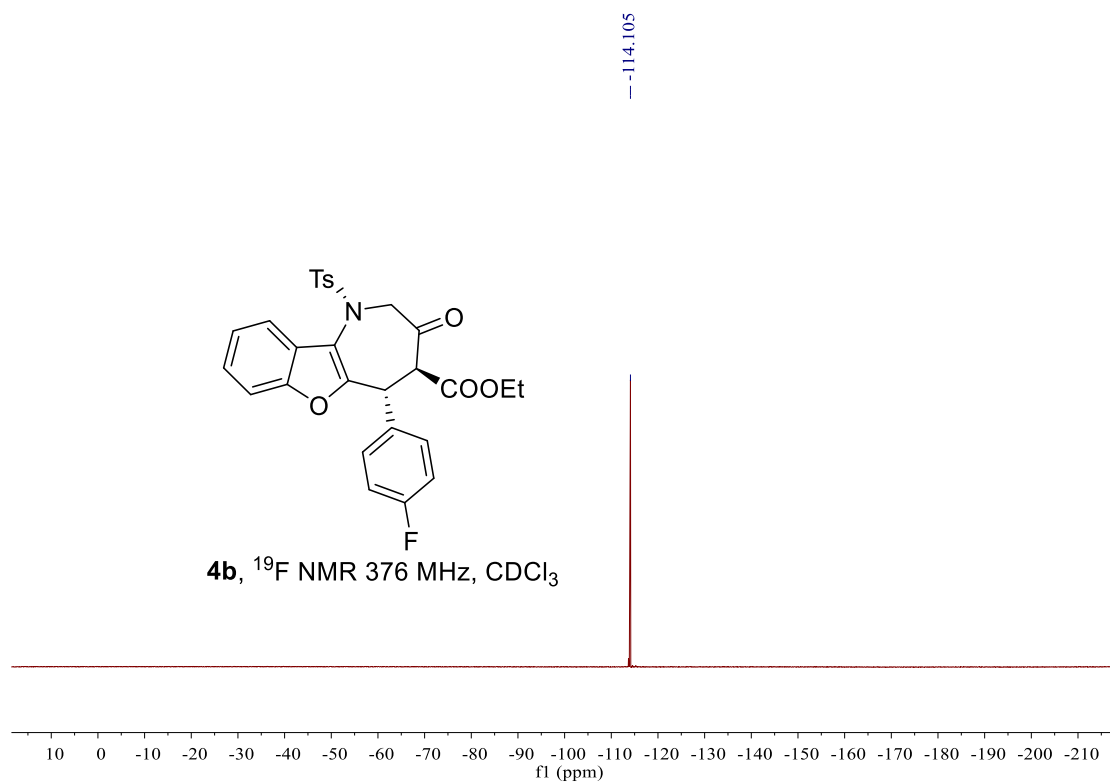

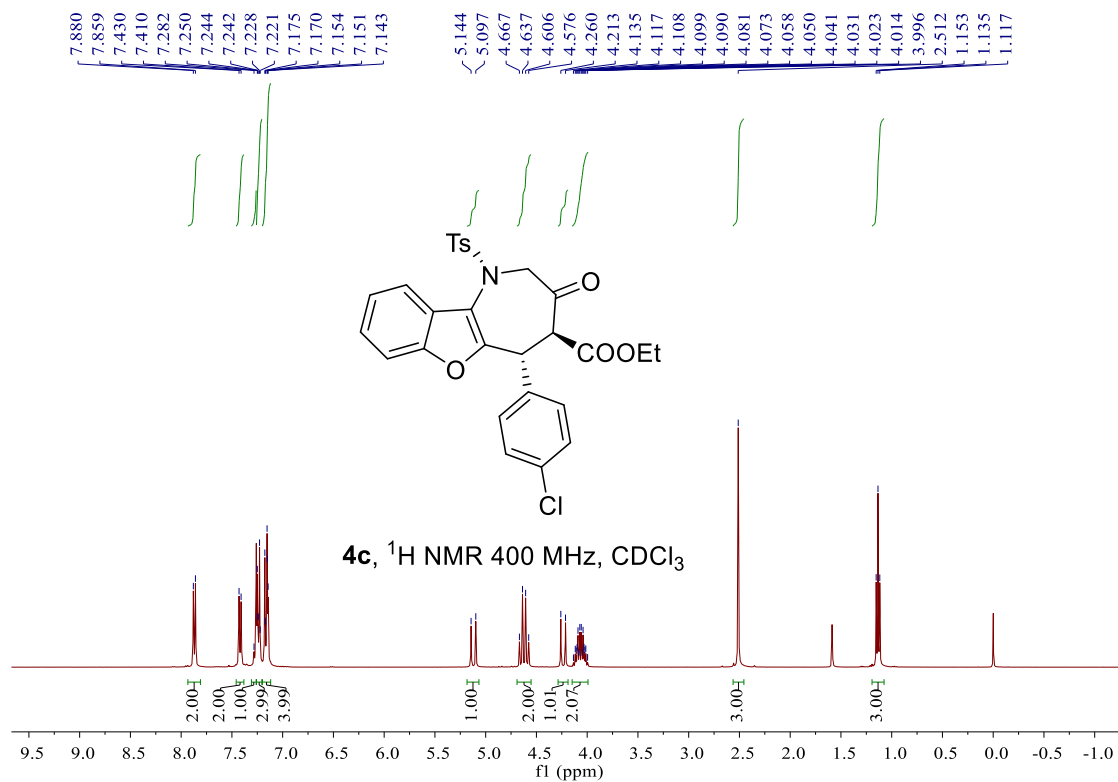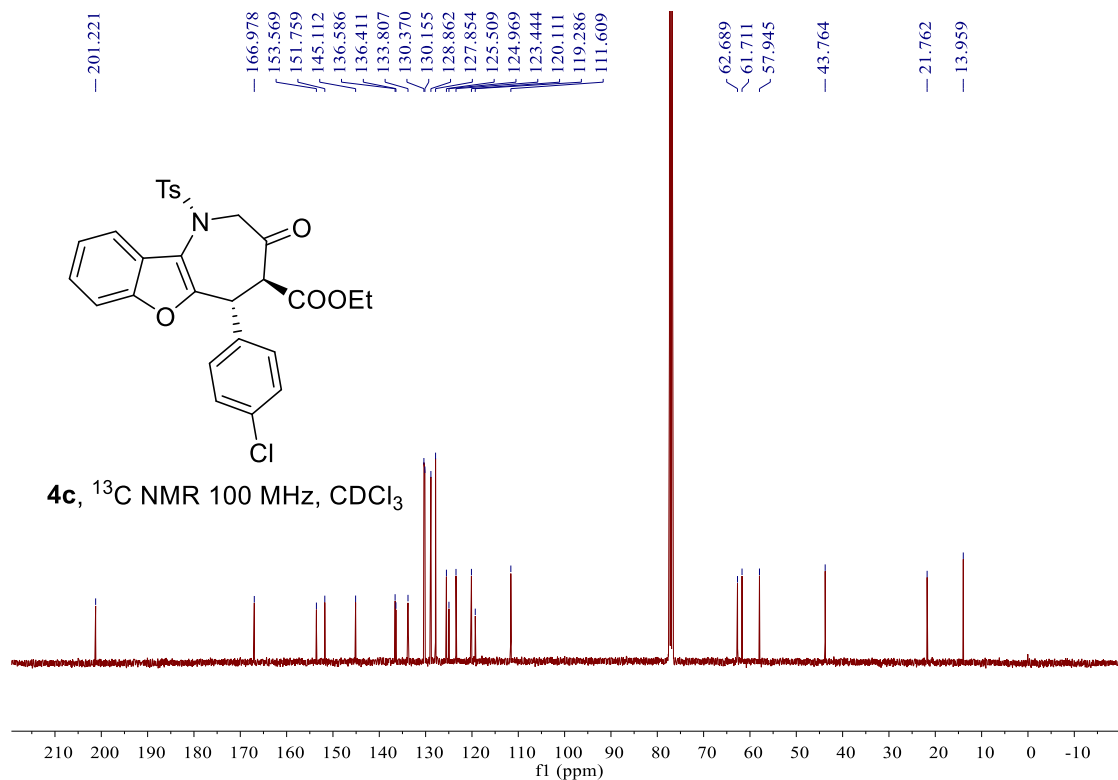

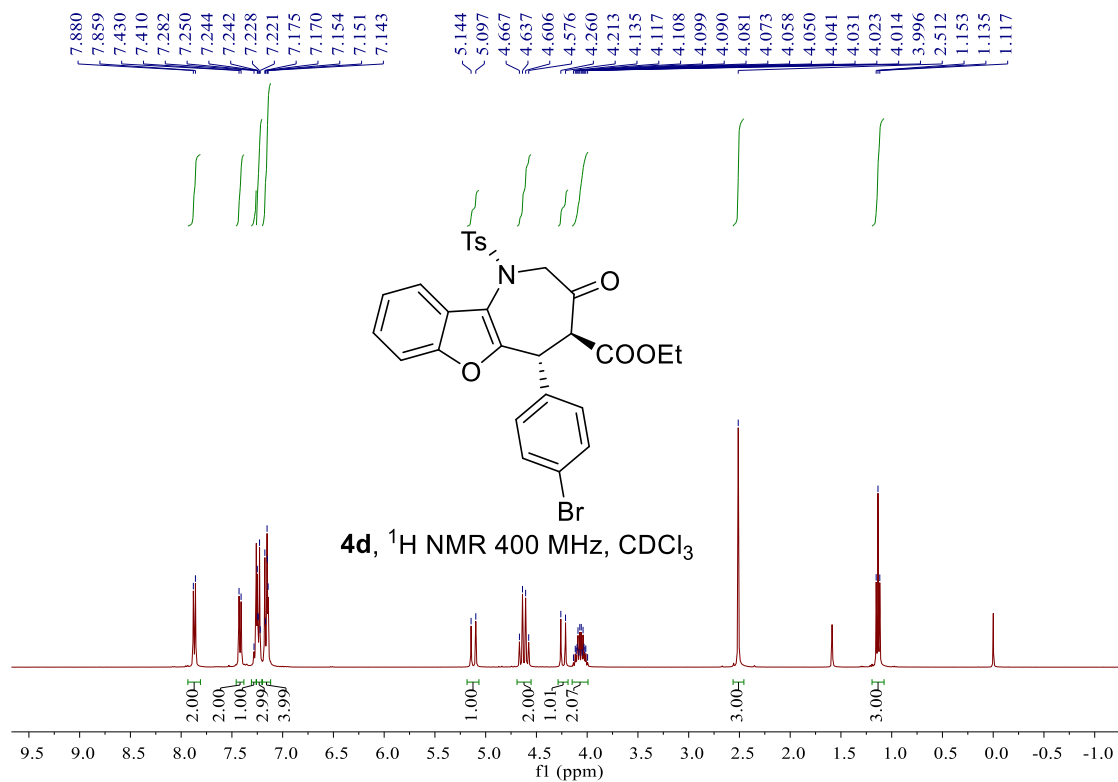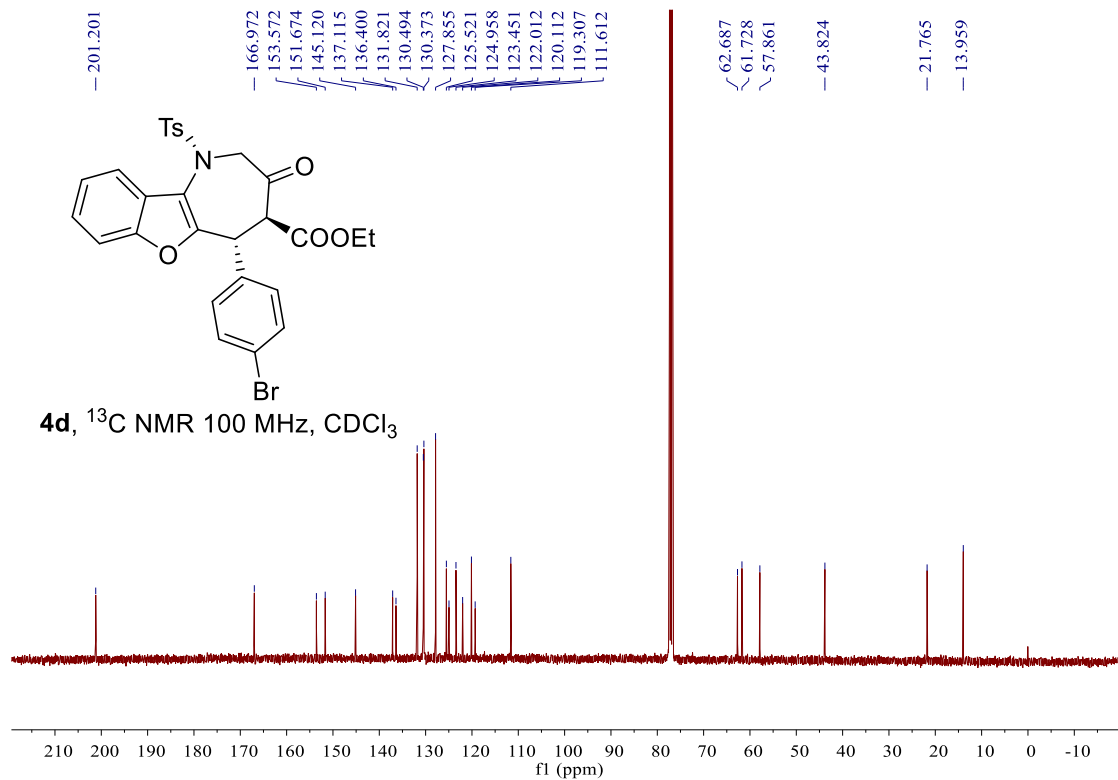

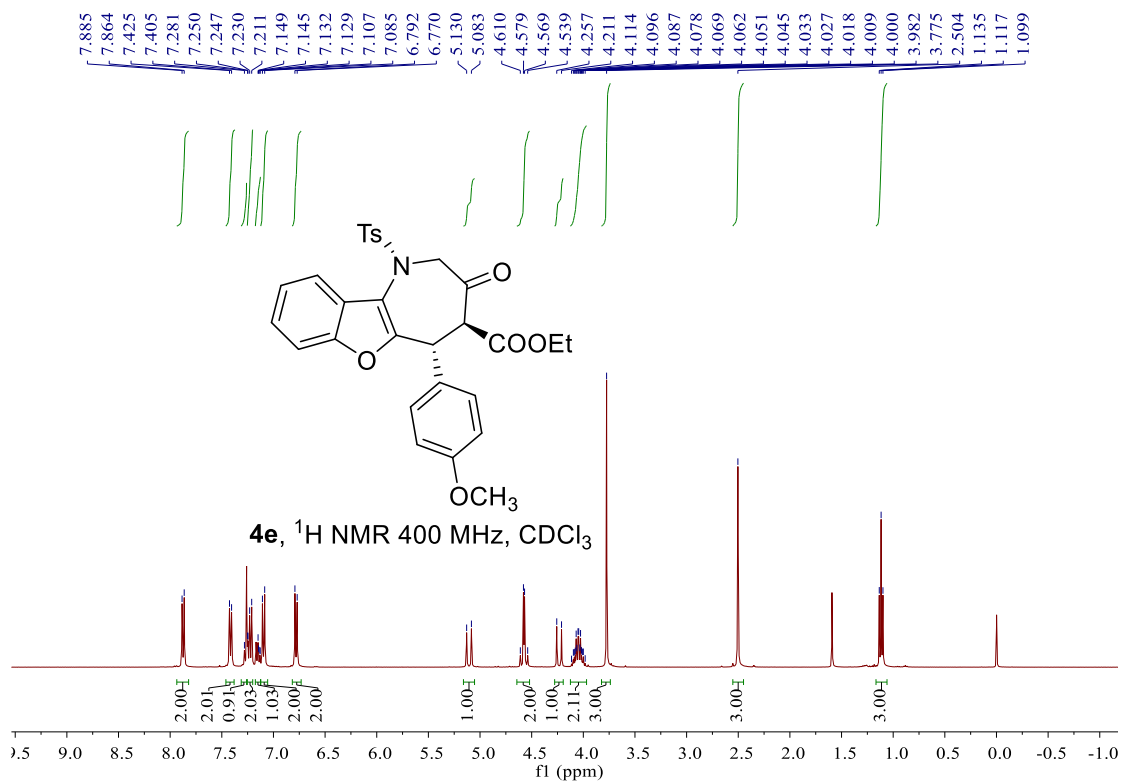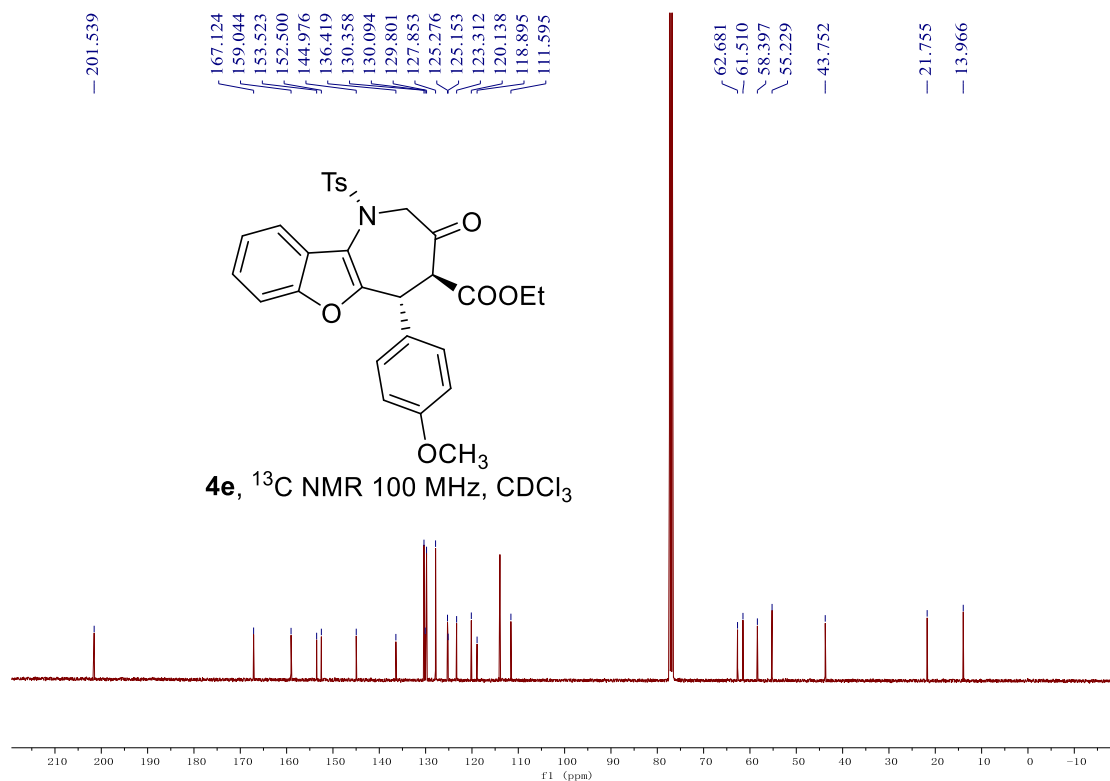



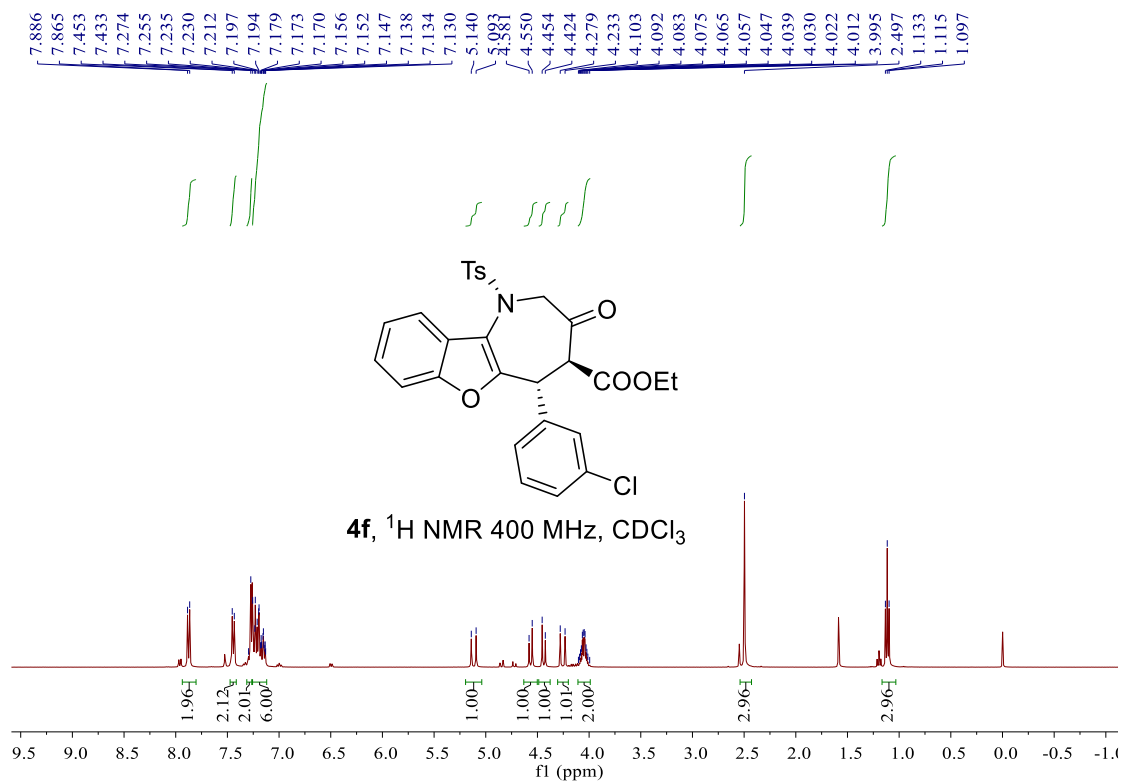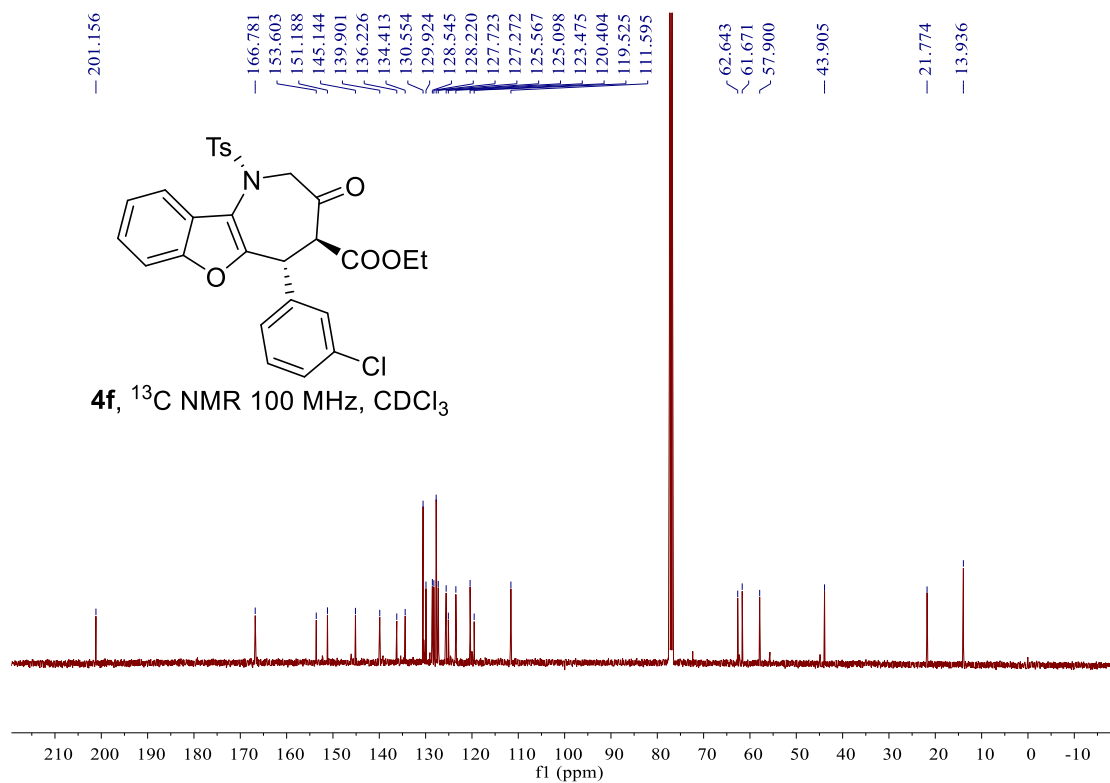

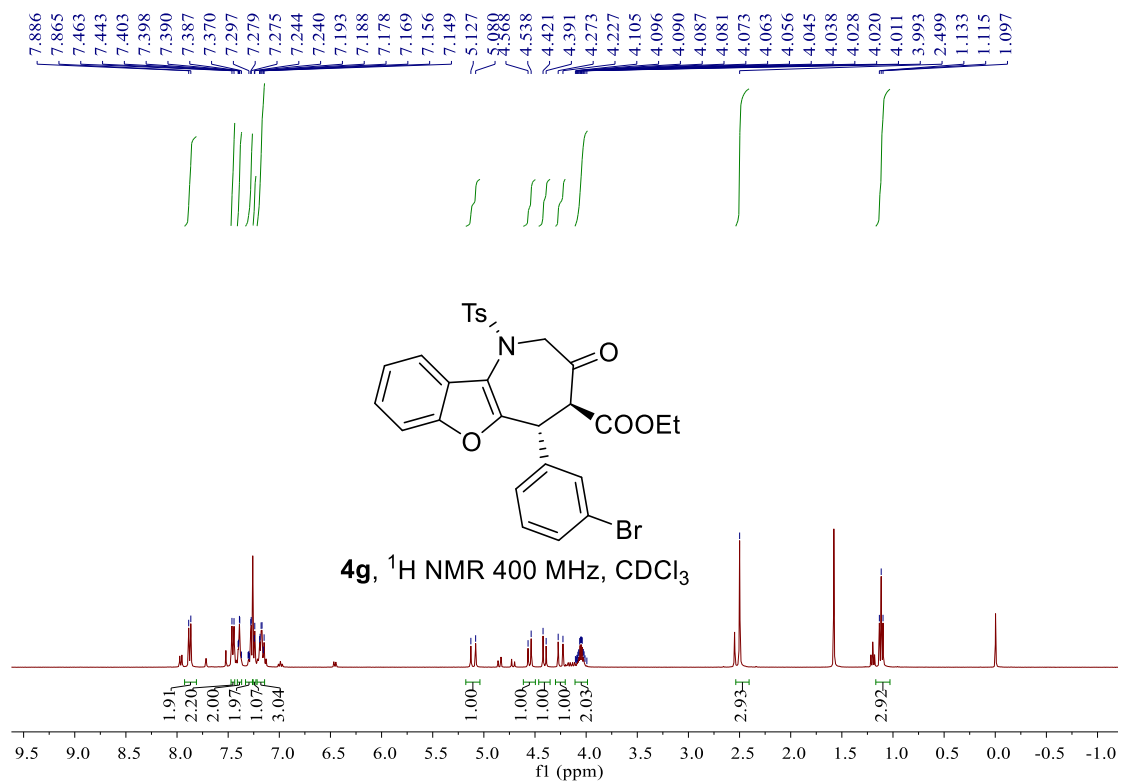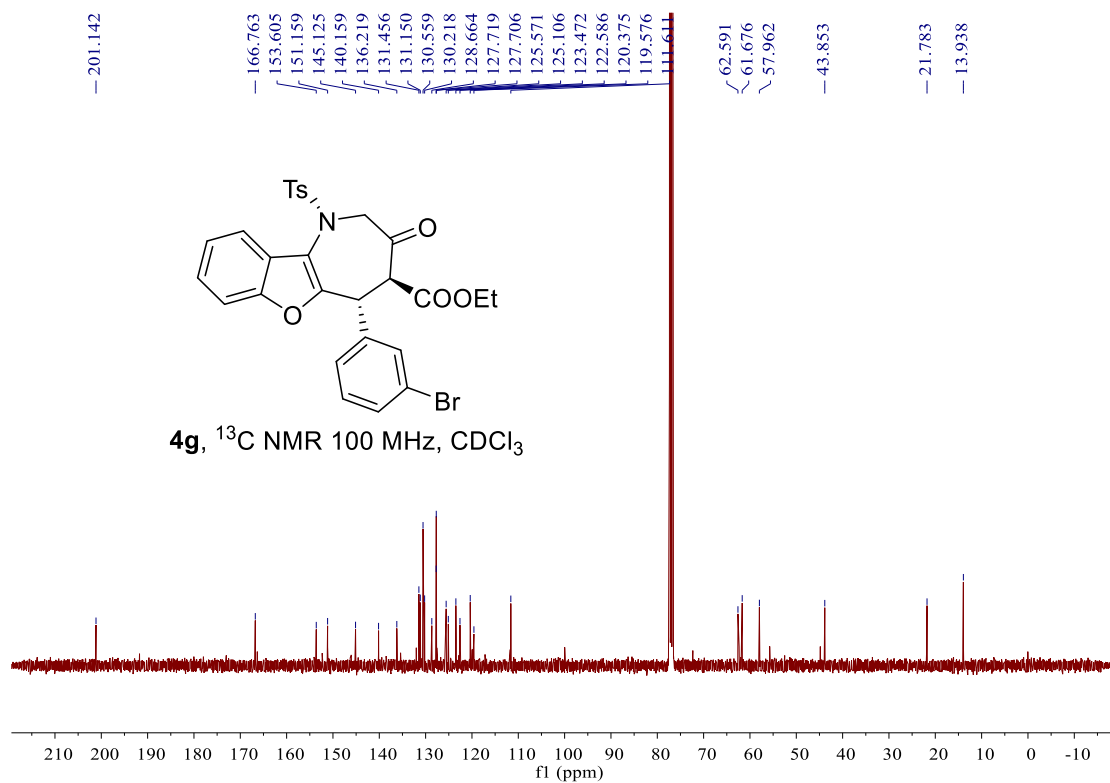

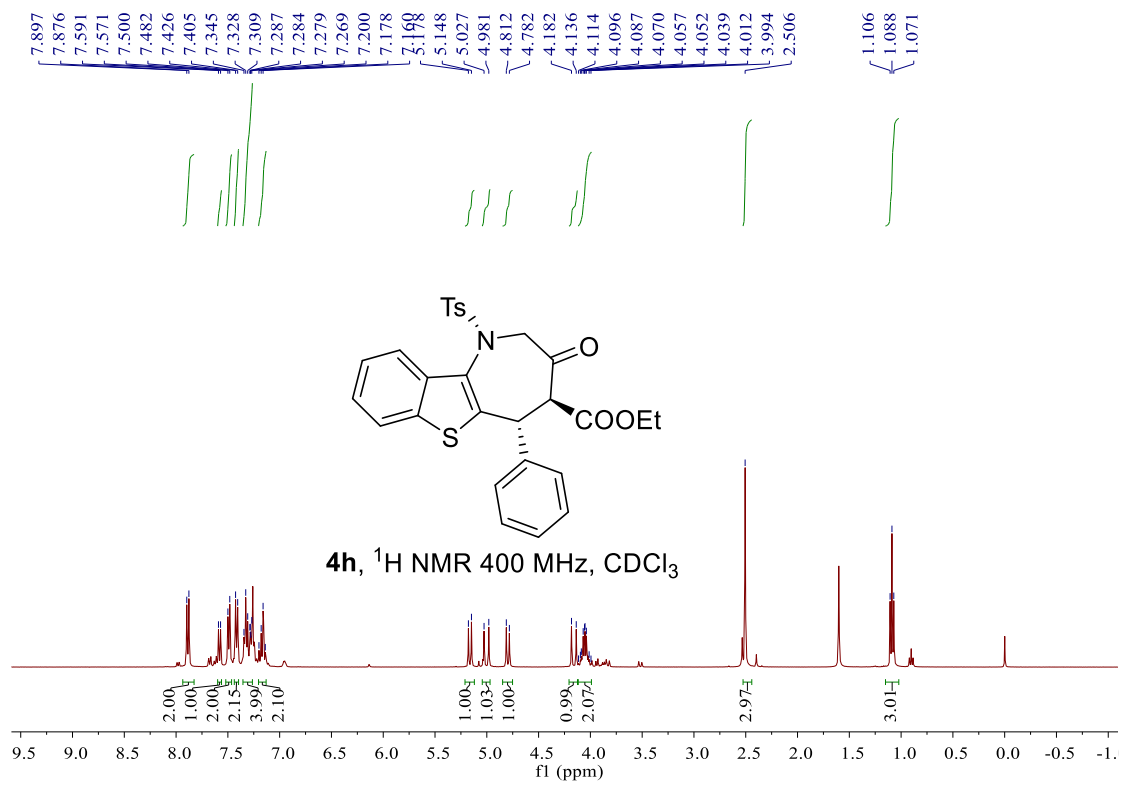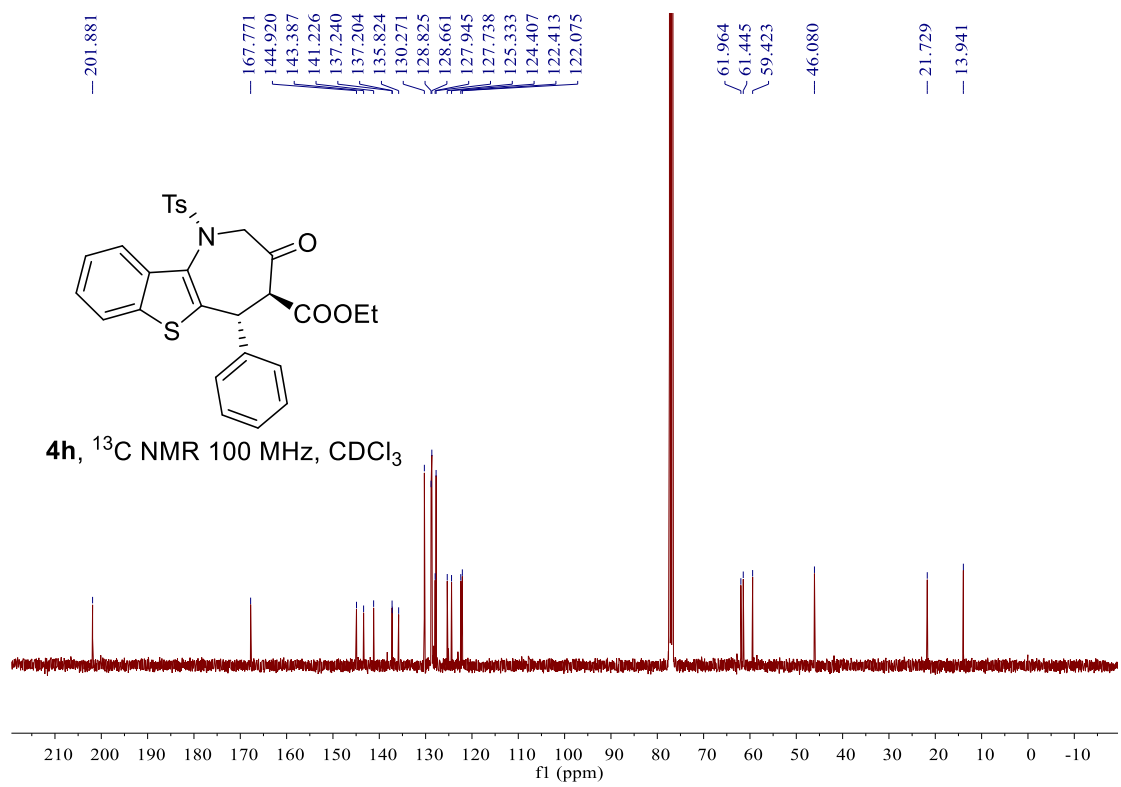

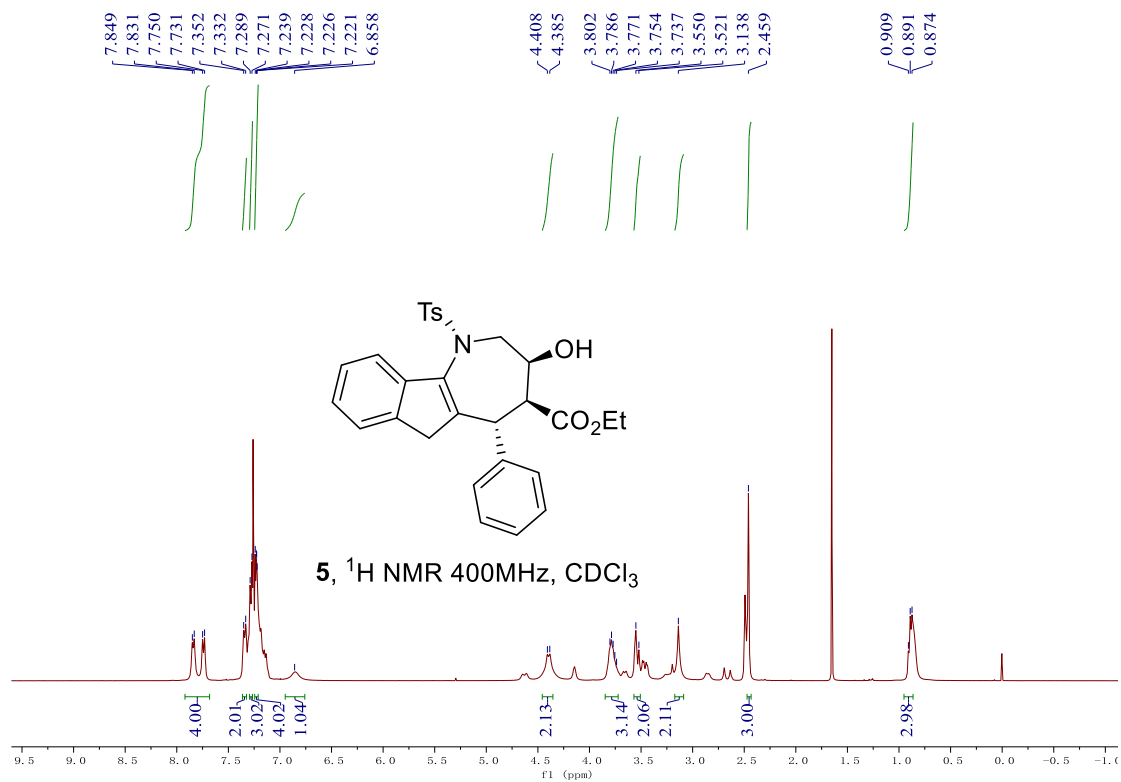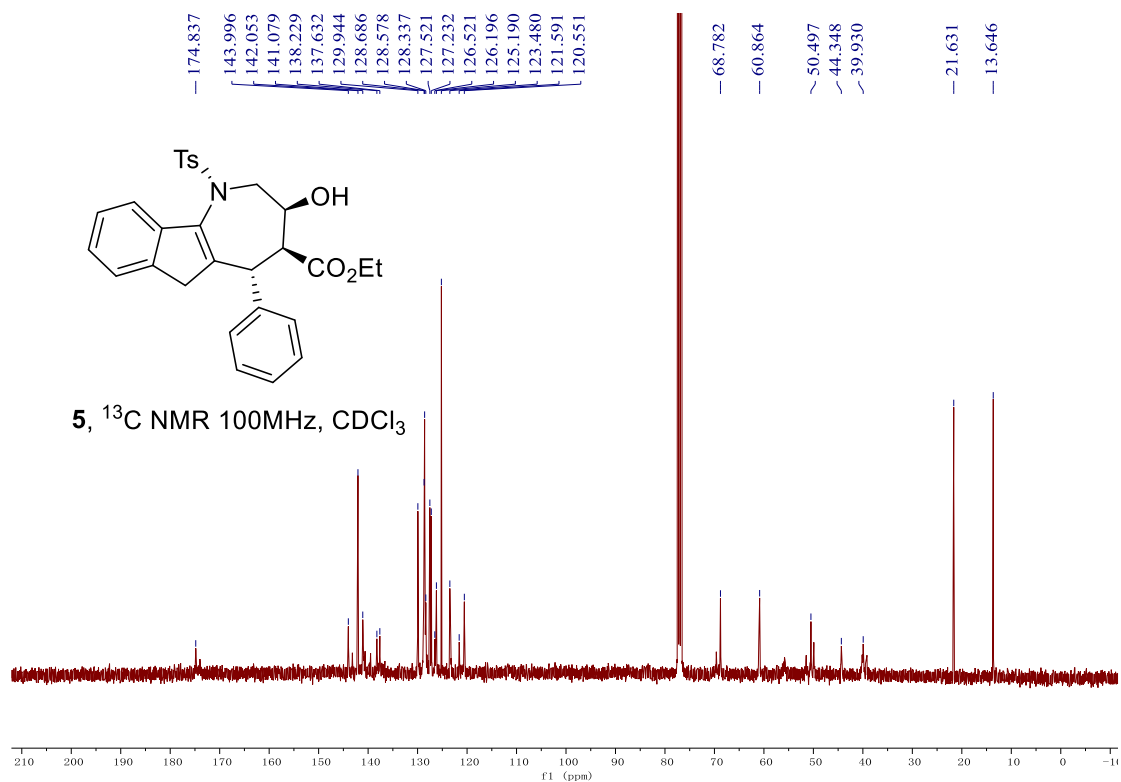

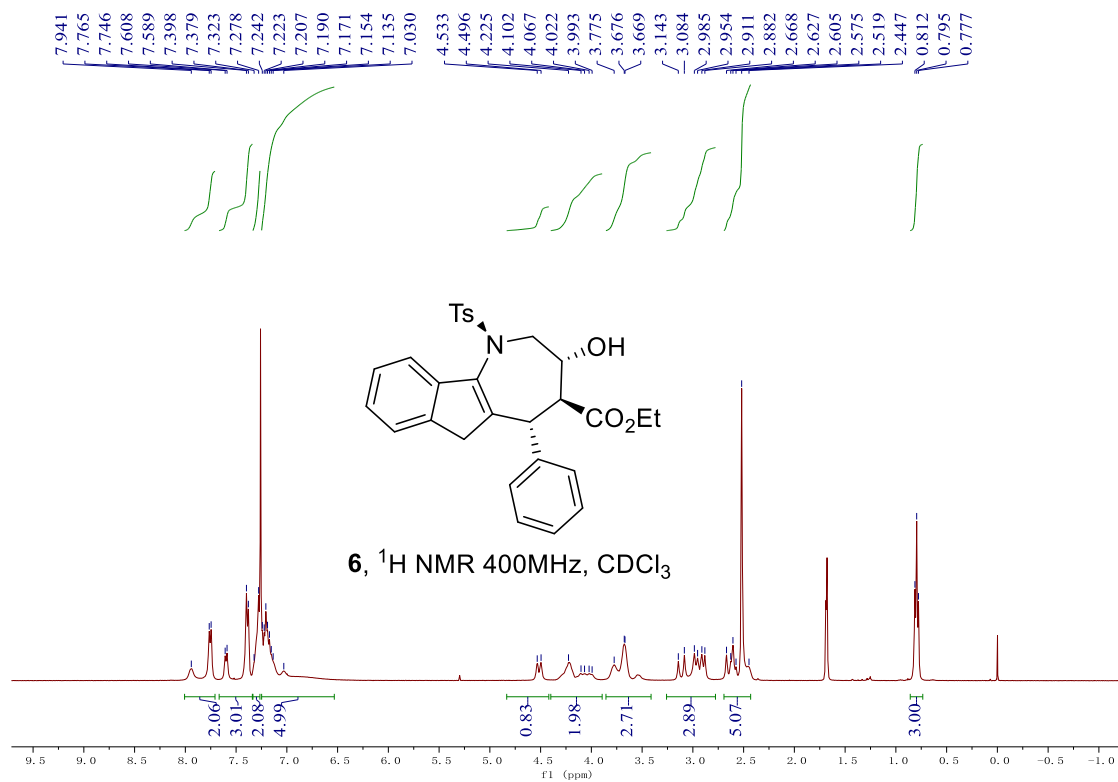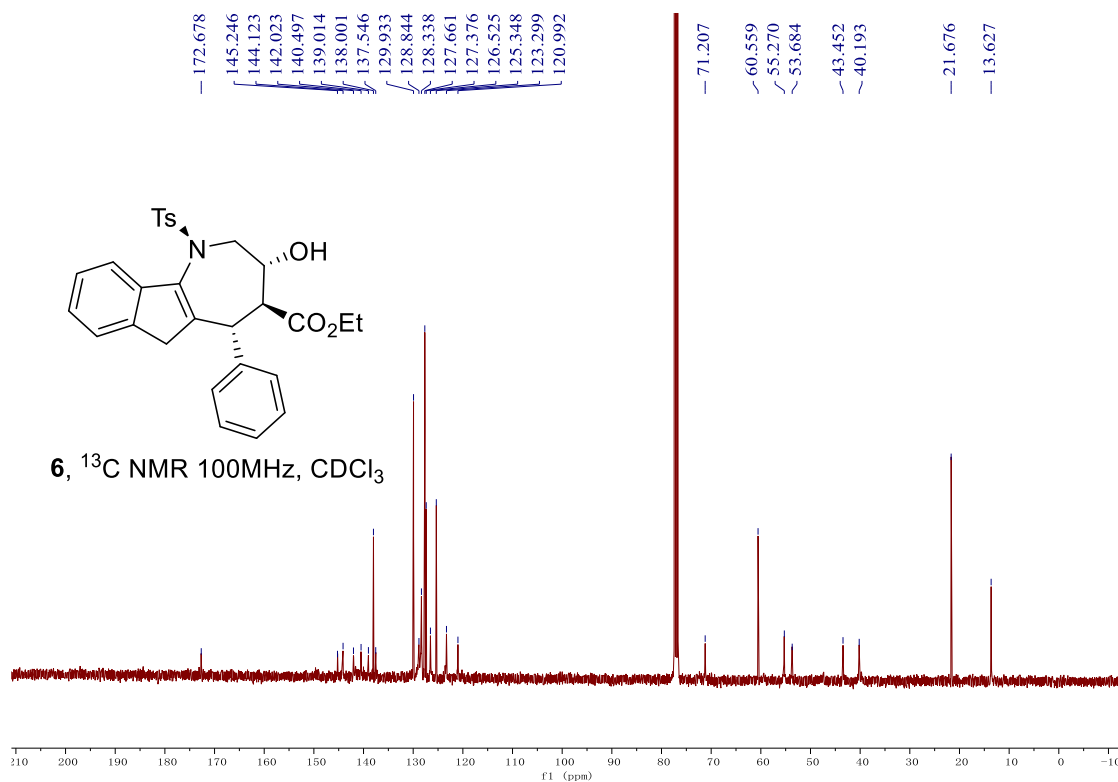

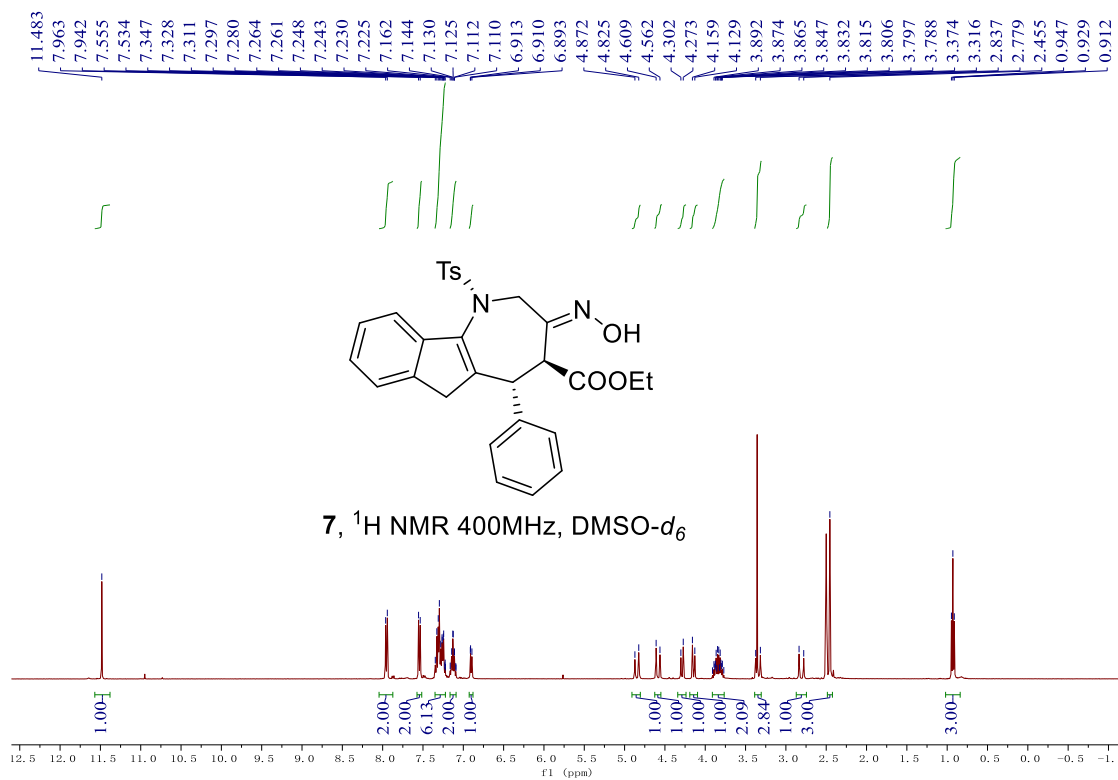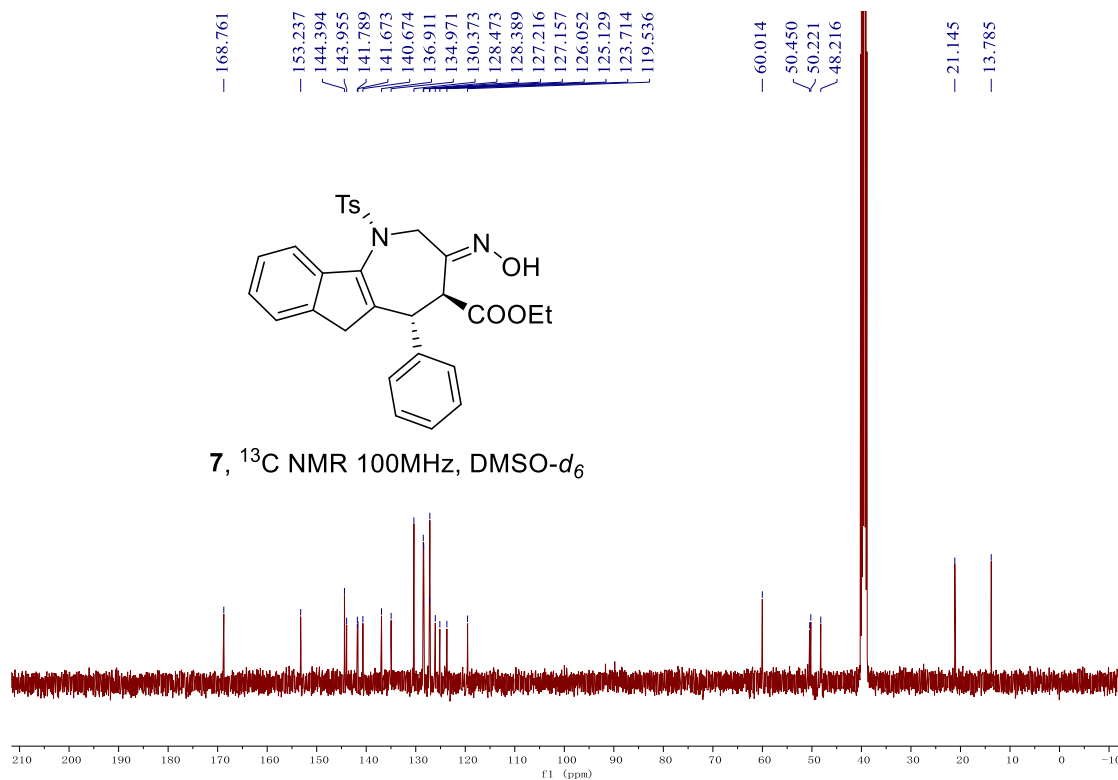

## 8. NOESY spectra of 7

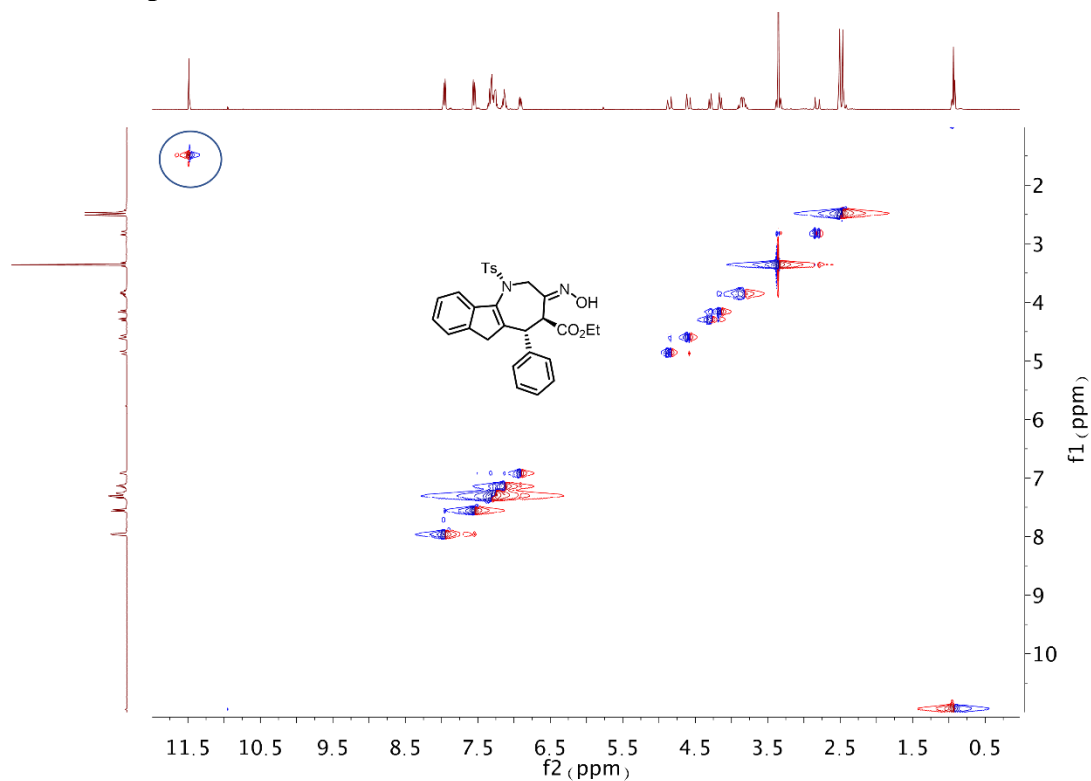

## 9. References

- (1) K. Verma and P. Banerjee, Synthesis of Indenopyridine Derivatives *via* MgI<sub>2</sub>-Promoted [2+4] Cycloaddition Reaction of *In-situ* Generated 2-Styrylmalonate from Donor-Acceptor Cyclopropanes and Chalconimines, *Adv. Synth. Catal.*, 2018, **360**, 3687-3692.
- (2) S. P. Midya, E. Gopi, N. Satam and I. N. N. Namboothiri, Synthesis of fused cyanopyrroles and spirocyclopropanes *via* addition of *N*-ylides to chalconimines, *Org. Biomol. Chem.*, 2017, **15**, 3616-3627.

## 10. X-ray crystal structures

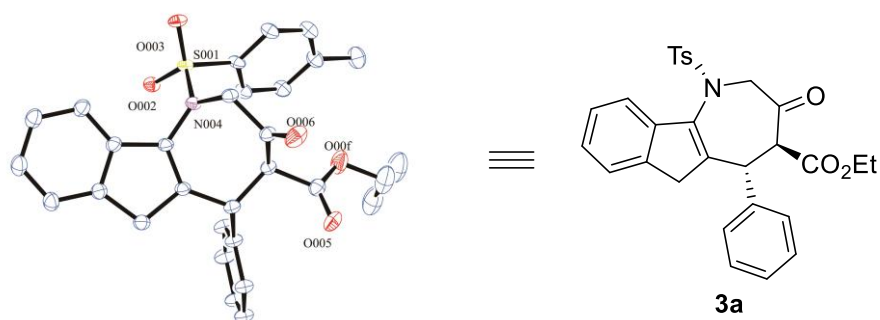

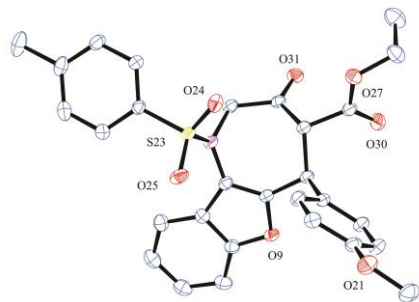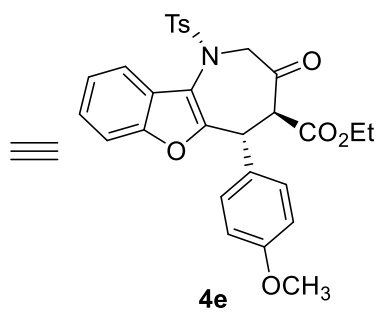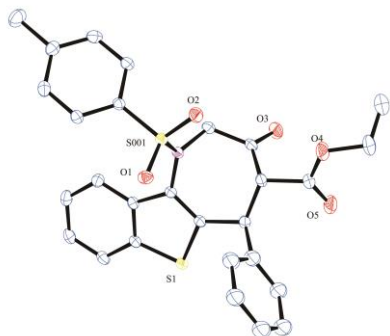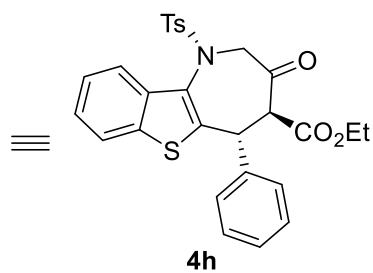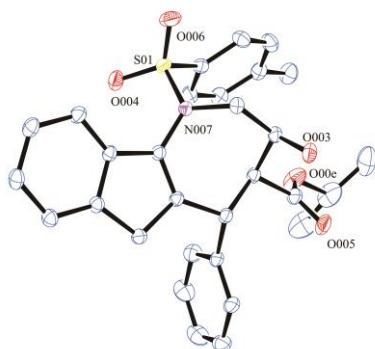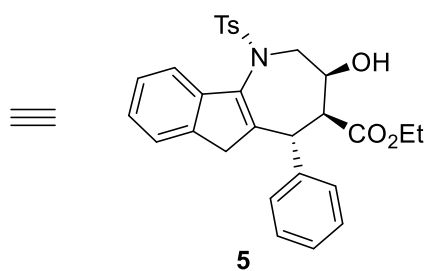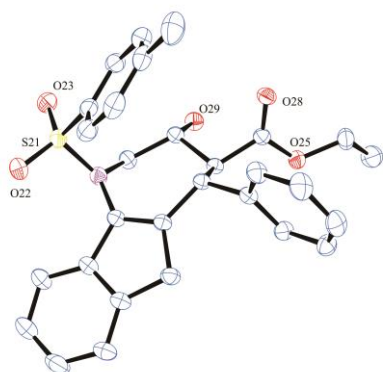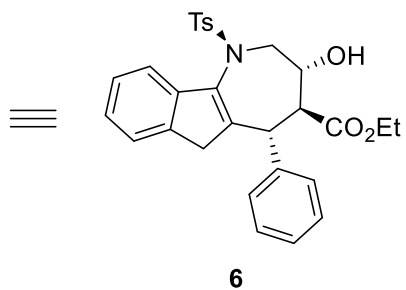

Supplement: d1ob01749g1.pdf [file d1ob01749g1.pdf]
